# Supplementary material
Source: PubMed Central journal article supplement (PMC7115653)
Supplement: mmc1.pdf [file mmc1.pdf]

## Supporting information

### Synthesis and structure-activity relationship studies of water-soluble $\beta$ -cyclodextrin-glycyrrhetic acid conjugates as potential anti-influenza virus agents

Shuobin Liang<sup>a,1</sup>, Man Li<sup>a,1</sup>, Hongwei Jin<sup>a</sup>, Yongmin Zhang<sup>c</sup>, Lihe Zhang<sup>a</sup>, Demin Zhou<sup>a</sup>, Sulong Xiao<sup>a,b\*</sup>

<sup>a</sup>State Key Laboratory of Natural and Biomimetic Drugs, School of Pharmaceutical Sciences, Peking University, Beijing 100191, China

<sup>b</sup>State Key Laboratory of Phytochemistry and Plant Resources in West China, Kunming Institute of Botany, Chinese Academy of Sciences, Kunming 650201, China

<sup>c</sup>Sorbonne Université Institut Parisien de Chimie Moléculaire, CNRS UMR 8232, 4 place Jussieu, 75005 Paris, France

1. Synthesis of compounds **7**, **8**, **14-17** and **36** P4
2. Selected <sup>1</sup>H, <sup>13</sup>C NMR and HRMS spectra P9

| NMR or HRMS                               | Page |
|-------------------------------------------|------|
| <sup>1</sup> H NMR of compound <b>9</b>   | S9   |
| <sup>13</sup> C NMR of compound <b>9</b>  | S9   |
| HRMS of compound <b>9</b>                 | S10  |
| <sup>1</sup> H NMR of compound <b>10</b>  | S10  |
| <sup>13</sup> C NMR of compound <b>10</b> | S11  |
| HRMS of compound <b>10</b>                | S11  |
| <sup>1</sup> H NMR of compound <b>11</b>  | S12  |
| <sup>13</sup> C NMR of compound <b>11</b> | S12  |
| HRMS of compound <b>11</b>                | S13  |
| <sup>1</sup> H NMR of compound <b>12</b>  | S13  |
| <sup>13</sup> C NMR of compound <b>12</b> | S14  |
| HRMS of compound <b>12</b>                | S14  |

|                                           |     |
|-------------------------------------------|-----|
| <sup>1</sup> H NMR of compound <b>18</b>  | S15 |
| <sup>13</sup> C NMR of compound <b>18</b> | S15 |
| HSQC of compound <b>18</b>                | S16 |
| H-H COSY of compound <b>18</b>            | S16 |
| HRMS of compound <b>18</b>                | S17 |
| <sup>1</sup> H NMR of compound <b>19</b>  | S17 |
| <sup>13</sup> C NMR of compound <b>19</b> | S18 |
| HSQC of compound <b>19</b>                | S18 |
| HRMS of compound <b>19</b>                | S19 |
| <sup>1</sup> H NMR of compound <b>20</b>  | S19 |
| <sup>13</sup> C NMR of compound <b>20</b> | S20 |
| HSQC of compound <b>20</b>                | S20 |
| HRMS of compound <b>20</b>                | S21 |

|                                           |     |
|-------------------------------------------|-----|
| <sup>1</sup> H NMR of compound <b>21</b>  | S21 |
| <sup>13</sup> C NMR of compound <b>21</b> | S22 |
| HSQC of compound <b>21</b>                | S22 |
| HRMS of compound <b>21</b>                | S23 |
| <sup>1</sup> H NMR of compound <b>22</b>  | S23 |
| <sup>13</sup> C NMR of compound <b>22</b> | S24 |
| HSQC of compound <b>22</b>                | S24 |
| HRMS of compound <b>22</b>                | S25 |
| <sup>1</sup> H NMR of compound <b>23</b>  | S25 |
| <sup>13</sup> C NMR of compound <b>23</b> | S26 |
| HSQC of compound <b>23</b>                | S26 |
| HRMS of compound <b>23</b>                | S27 |
| <sup>1</sup> H NMR of compound <b>24</b>  | S27 |
| <sup>13</sup> C NMR of compound <b>24</b> | S28 |
| HSQC of compound <b>24</b>                | S28 |
| HRMS of compound <b>24</b>                | S29 |
| <sup>1</sup> H NMR of compound <b>25</b>  | S29 |
| <sup>13</sup> C NMR of compound <b>25</b> | S30 |
| HSQC of compound <b>25</b>                | S30 |
| HRMS of compound <b>25</b>                | S31 |
| <sup>1</sup> H NMR of compound <b>26</b>  | S31 |
| <sup>13</sup> C NMR of compound <b>26</b> | S32 |
| HSQC of compound <b>26</b>                | S32 |
| HRMS of compound <b>26</b>                | S33 |
| <sup>1</sup> H NMR of compound <b>27</b>  | S33 |
| <sup>13</sup> C NMR of compound <b>27</b> | S34 |
| HSQC of compound <b>27</b>                | S34 |
| HRMS of compound <b>27</b>                | S35 |
| <sup>1</sup> H NMR of compound <b>28</b>  | S35 |

|                                           |     |
|-------------------------------------------|-----|
| <sup>13</sup> C NMR of compound <b>28</b> | S36 |
| HRMS of compound <b>28</b>                | S36 |
| <sup>1</sup> H NMR of compound <b>29</b>  | S37 |
| <sup>13</sup> C NMR of compound <b>29</b> | S37 |
| HRMS of compound <b>29</b>                | S38 |
| <sup>1</sup> H NMR of compound <b>30</b>  | S38 |
| <sup>13</sup> C NMR of compound <b>30</b> | S39 |
| HSQC of compound <b>30</b>                | S39 |
| HRMS of compound <b>30</b>                | S40 |
| <sup>1</sup> H NMR of compound <b>31</b>  | S40 |
| <sup>13</sup> C NMR of compound <b>31</b> | S41 |
| HSQC of compound <b>31</b>                | S41 |
| HRMS of compound <b>31</b>                | S42 |
| <sup>1</sup> H NMR of compound <b>32</b>  | S42 |
| <sup>13</sup> C NMR of compound <b>32</b> | S43 |
| HRMS of compound <b>32</b>                | S43 |
| <sup>1</sup> H NMR of compound <b>33</b>  | S44 |
| <sup>13</sup> C NMR of compound <b>33</b> | S44 |
| HSQC of compound <b>33</b>                | S45 |
| HRMS of compound <b>33</b>                | S45 |
| <sup>1</sup> H NMR of compound <b>34</b>  | S46 |
| <sup>13</sup> C NMR of compound <b>34</b> | S46 |
| HSQC of compound <b>34</b>                | S47 |
| HRMS of compound <b>34</b>                | S47 |
| <sup>1</sup> H NMR of compound <b>35</b>  | S48 |
| <sup>13</sup> C NMR of compound <b>35</b> | S48 |
| HSQC of compound <b>35</b>                | S49 |
| HRMS of compound <b>35</b>                | S49 |
| <sup>1</sup> H NMR of compound <b>37</b>  | S50 |

|                                           |     |
|-------------------------------------------|-----|
| <sup>13</sup> C NMR of compound <b>37</b> | S50 |
| HRMS of compound <b>37</b>                | S51 |
| <sup>1</sup> H NMR of compound <b>38</b>  | S51 |
| <sup>13</sup> C NMR of compound <b>38</b> | S52 |
| HSQC of compound <b>38</b>                | S52 |
| HRMS of compound <b>38</b>                | S53 |
| <sup>1</sup> H NMR of compound <b>39</b>  | S53 |

|                                           |     |
|-------------------------------------------|-----|
| <sup>13</sup> C NMR of compound <b>39</b> | S54 |
| HSQC of compound <b>39</b>                | S54 |
| HRMS of compound <b>39</b>                | S55 |
| <sup>1</sup> H NMR of compound <b>40</b>  | S55 |
| <sup>13</sup> C NMR of compound <b>40</b> | S56 |
| HSQC of compound <b>40</b>                | S56 |
| HRMS of compound <b>40</b>                | S57 |

## 1. Synthesis of compounds **7**, **8**, **14-17** and **36**

### 1.1 1H-benzotriazol-1-yl 3 $\beta$ -hydroxy-11-oxo-olean-12-en-30-oate (**7**)<sup>[1]</sup>

To a solution of glycyrrhetic acid **1** (4 g, 8.51 mmol) and TBTU (4 g, 12.4 mmol) in dry tetrahydrofuran (80 mL), DIPEA (2 mL, 1.21 mmol) was added. After continuous stirring at room temperature for 24 h, the solvent was removed by steaming. The residue was purified by column chromatography to give 4.5 g (90%) of compound **7** as a canary yellow solid.  $R_f = 0.13$  (petroleum ether:ethyl acetate = 1:1); <sup>1</sup>H NMR (400 MHz, CDCl<sub>3</sub>):  $\delta$  8.06 (d, 1H,  $J = 8.4$  Hz), 7.55 (t, 1H,  $J = 7.2$  Hz), 7.42 (t, 1H,  $J = 7.4$  Hz), 7.33 (d, 1H,  $J = 8.3$  Hz), 5.68 (s, 1H), 3.21 (dd, 1H,  $J = 10.8, 5.4$  Hz), 2.74 (td, 1H,  $J = 13.5, 3.4$  Hz), 2.32 (s, 1H), 2.14–0.94 (m, other aliphatic ring protons), 1.56, 1.41, 1.13, 1.11, 0.99, 0.91, 0.78 (s, each 3H, 7  $\times$  CH<sub>3</sub>), 0.68 (d, 1H,  $J = 11.6$  Hz); <sup>13</sup>C NMR (100 MHz, CDCl<sub>3</sub>):  $\delta$  199.94, 172.53, 167.70, 143.49, 128.93, 128.84, 128.52, 124.83, 120.55, 78.64, 61.80, 55.26, 48.20, 45.34, 44.33, 43.13, 40.83, 39.07, 39.04, 37.70, 37.03, 32.68, 31.94, 31.11, 28.49, 28.03, 27.96, 27.16, 26.29, 23.42, 18.50, 17.07, 16.28, 15.52

### 1.2 (N-prop-2-yn-1-yl) (3 $\beta$ ,20 $\beta$ )-3-hydroxy-11-oxo-olean-12-en-29-amide (**8**)<sup>[2]</sup>

To a solution of compound **7** (505 mg, 0.85 mmol) and 69  $\mu$ L propargyl amine (1.27 mmol) in DMF (15 mL) was added Na<sub>2</sub>CO<sub>3</sub> (361 mg, 1.62 mmol). The resulting solution was stirred vigorously for 24 h at room temperature. The solvent was removed by steaming. The residue was purified by column chromatography to give 223 mg (51%) of compound **8** as a white solid.  $R_f = 0.33$  (petroleum ether:ethyl acetate = 1:1); <sup>1</sup>H NMR (400 MHz, CDCl<sub>3</sub>):  $\delta$  5.83 (t, 1H,  $J = 4.2$  Hz), 5.68 (s, 1H), 4.11 (dd, 1H,  $J = 17.4, 2.9$  Hz), 4.02 (dd, 1H,  $J = 17.3, 2.9$  Hz), 3.22 (dd, 1H,  $J = 10.2, 5.8$  Hz), 2.78 (td, 1H,  $J = 13.4, 3.4$  Hz), 2.33 (s, 1H), 2.24 (t, 1H,  $J = 2.8$  Hz), 2.17–0.94 (m, other aliphatic ring protons), 1.37, 1.13 (s, each 3H, 2  $\times$  CH<sub>3</sub>), 1.12 (s, 6H, 2  $\times$  CH<sub>3</sub>), 1.00, 0.81, 0.80 (s, each 3H, 3  $\times$  CH<sub>3</sub>), 0.69 (d, 1H,  $J = 11.5$  Hz); <sup>13</sup>C NMR (100 MHz, CDCl<sub>3</sub>):  $\delta$  200.11, 175.46, 168.99, 128.54, 79.73, 78.76, 71.67, 61.81, 54.94, 48.02, 45.34, 43.51, 43.17, 41.79, 39.16, 39.12, 37.33, 37.07, 32.75, 31.89, 31.43, 29.30, 28.38, 28.09, 27.28, 26.45, 26.37, 23.33, 18.66, 17.46, 16.34

### 1.3 6<sup>A</sup>-O-(*p*-Toluenesulfonyl)- $\beta$ -CD (**14**)<sup>[3]</sup>

$\beta$ -CD (10.0g, 8.8 mmol) was suspended in 70 mL of water, and NaOH (1.06 g, 26.4 mmol) in 3.0 mL of water was added dropwise over 10 min. The suspension became homogeneous after the addition was complete. *p*-Toluenesulfonyl chloride (1.68 g, 8.8 mmol) in 4.0 mL CH<sub>3</sub>CN was added dropwise over 20 min. A white precipitate was visible immediately after the start of the addition. The reaction mixture was stirred another 2 h at room temperature and then filtered. The filtrate was acidified to about pH 6-7 with 1N HCl and the product allowed to precipitate at 4°C overnight. The resulting white precipitate was recovered by suction filtration to provide 1.65 g of crude product. Recrystallization of hot water afforded **2** (1.07 g) as a white solid in 9.4% yield.  $R_f = 0.52$  (*i*-PrOH:NH<sub>4</sub>OH:H<sub>2</sub>O = 5:2:2); <sup>1</sup>H NMR (400 MHz, DMSO-*d*<sub>6</sub>):  $\delta$  7.74 (d, 2H,  $J = 7.6$  Hz, 2  $\times$  arom-H), 7.42 (d, 2H,  $J = 7.5$  Hz, 2  $\times$  arom-H), 5.70 (br s, 14H, 14  $\times$  OH), 4.83 (br s, 5H, 5  $\times$  H<sub>1</sub>), 4.75 (br s, 2H, 2  $\times$  H<sub>1</sub>), 4.30-4.33 (m, 2H), 4.16-4.19 (m, 2H), 3.20-3.64 (m, 44H, overlaps with HOD), 2.42 (s, 3H, CH<sub>3</sub>); <sup>13</sup>C NMR (100 MHz, DMSO-*d*<sub>6</sub>):  $\delta$  144.78, 132.70, 129.86, 127.55, 102.23, 101.97, 101.92, 101.28, 81.67, 81.57, 81.51, 81.44, 81.20, 80.80, 73.06, 72.93, 72.73, 72.69, 72.43, 72.37, 72.16, 72.04, 71.88, 69.68, 68.91, 59.93, 59.83, 59.81, 59.55, 59.30, 21.18; ESI-HRMS Calcd for C<sub>49</sub>H<sub>80</sub>NO<sub>37</sub>S [M+NH<sub>4</sub>]<sup>+</sup>: 1306.4124. Found 1306.4128.

#### 1.4 6<sup>A</sup>-Azido-6<sup>A</sup>-deoxy-per-*O*-acetyl- $\beta$ -CD (**16**)<sup>[4, 5]</sup>

6<sup>A</sup>-*O*-(*p*-tolsulfonyl)- $\beta$ -CD (1.01 g, 0.78 mmol) was suspended in water (50 mL), NaN<sub>3</sub> (0.153 g, 0.24 mmol) was added. The reaction was carried out with stirring at 80°C for 12 h. The mixture was cooled to room temperature and poured into acetone (200 mL). The resulting precipitate was filtrated and dried in vacuo to give the azide product as a white power (0.736 g, 81%).  $R_f = 0.37$  (*i*-PrOH:NH<sub>4</sub>OH:H<sub>2</sub>O = 5:2:2).

To a solution of 6<sup>A</sup>-azido-6<sup>A</sup>-deoxy- $\beta$ -CD (160 mg, 0.14 mmol) in pyridine (2 mL) was added 16.8 mg of DMAP (0.14 mmol) and 1 mL Ac<sub>2</sub>O at room temperature. The reaction mixture was stirred for 18 h under nitrogen. The solvent was removed in vacuo. The residue was subjected to flash chromatography (eluent: CH<sub>2</sub>Cl<sub>2</sub>:CH<sub>3</sub>OH = 30:1) to give 237 mg (86%) of compound **4** as a white foam.  $R_f = 0.57$  (CH<sub>2</sub>Cl<sub>2</sub>:CH<sub>3</sub>OH = 10:1); <sup>1</sup>H NMR (400 MHz, CDCl<sub>3</sub>):  $\delta$  5.13-5.27 (m, 7H, 7  $\times$  H<sub>3</sub>), 5.07 (d, 1H,  $J = 3.9$  Hz, H<sub>1</sub>), 5.00-5.04 (m, 5H, 5  $\times$  H<sub>1</sub>), 4.93 (d, 1H,  $J = 3.8$  Hz, H<sub>1</sub>), 4.68-4.77 (m, 7H, 7  $\times$  H<sub>2</sub>), 4.45-4.54 (m, 6H, 6  $\times$  H<sub>6</sub>), 3.98-4.25 (m, 13H, 6  $\times$  H<sub>6</sub>, 7  $\times$  H<sub>4</sub>), 3.60-3.73 (m,

9H, 2 × H<sub>6</sub>, 7 × H<sub>5</sub>), 1.95-2.08 (m, 60H, 20 × CH<sub>3</sub>); <sup>13</sup>C NMR (100 MHz, CDCl<sub>3</sub>): δ 170.57, 170.54, 170.51, 170.47, 170.43, 170.34, 170.32, 170.24, 170.21, 170.19, 170.07, 169.25, 169.21, 169.20, 169.17, 169.15, 96.81, 96.75, 96.59, 96.53, 96.40, 96.35, 77.21, 76.68, 76.54, 76.37, 76.28, 71.11, 70.89, 70.76, 70.63, 70.54, 70.37, 70.19, 70.13, 69.95, 69.72, 69.50, 69.38, 69.27, 69.25, 62.52, 62.44, 62.31, 50.53, 20.67, 20.59; ESI-HRMS Calcd for C<sub>82</sub>H<sub>113</sub>N<sub>4</sub>O<sub>54</sub> [M+NH<sub>4</sub>]<sup>+</sup>: 2017.6214. Found 2017.6179; C<sub>82</sub>H<sub>109</sub>N<sub>3</sub>NaO<sub>54</sub> [M+Na]<sup>+</sup>: 2022.5768. Found 2022.5705; C<sub>82</sub>H<sub>110</sub>KN<sub>3</sub>O<sub>54</sub> [M+H+K]<sup>+</sup>: 2039.5591. Found 2039.5624.

#### 1.5 6<sup>A</sup>-Azido-per-*O*-methyl-β-CD (**17**)<sup>[4, 5]</sup>

To a solution of the azide product (365 mg, 0.31 mmol) in dried DMF (10 mL) was added 372 mg (60%, 9.3 mmol) of NaH at 0°C under nitrogen. After the reaction mixture was stirred at 0°C for 1 h, 0.72 mL of CH<sub>3</sub>I (8.1 mmol) was added. The reaction mixture was stirred at 0°C for 1 h and then kept at room temperature for another 12 h under nitrogen. CH<sub>3</sub>OH was added dropwise to quench the reaction and the solvent was removed in vacuo. The residue dissolved with CH<sub>2</sub>Cl<sub>2</sub>, washed with brine, dried with Na<sub>2</sub>SO<sub>4</sub>, filtrated and the solvent was removed in vacuo. The residue was subjected to flash chromatography (eluent: CH<sub>2</sub>Cl<sub>2</sub>:CH<sub>3</sub>OH = 40:1) to give 280 mg (62%) of **3** as a white foam. R<sub>f</sub> = 0.63 (CH<sub>2</sub>Cl<sub>2</sub>:CH<sub>3</sub>OH = 10:1); <sup>1</sup>H NMR (400 MHz, CDCl<sub>3</sub>): δ 5.08-5.13 (m, 6H, 6 × H<sub>1</sub>), 5.05 (d, 1H, *J* = 3.7 Hz, H<sub>1</sub>), 3.41-3.94 (m, 33H), 3.72 (m, 1H, H<sub>6β</sub><sup>A</sup>), 3.64 (s, 3H, OCH<sub>3</sub>), 3.63 (s, 3H, OCH<sub>3</sub>), 3.62 (2 × s, 15H, 5 × OCH<sub>3</sub>), 3.62 (m, 1H, H<sub>6α</sub><sup>A</sup>), 3.50 (2 × s, 6H, 2 × OCH<sub>3</sub>), 3.49 (s, 9H, 3 × OCH<sub>3</sub>), 3.48 (s, 6H, 2 × OCH<sub>3</sub>), 3.38 (s, 3H, OCH<sub>3</sub>), 3.37 (s, 15H, 5 × OCH<sub>3</sub>), 3.14-3.19 (m, 7H, 7 × H<sub>2</sub>); <sup>13</sup>C NMR (100 MHz, CDCl<sub>3</sub>): δ 99.34, 99.12, 98.97, 98.86, 98.39, 82.10, 82.06, 82.00, 81.91, 81.87, 81.80, 81.74, 81.72, 81.43, 80.37, 80.27, 80.22, 80.18, 80.11, 80.01, 71.57, 71.45, 71.43, 71.37, 71.27, 71.13, 71.01, 70.96, 70.89, 70.84, 61.49, 61.45, 61.42, 61.39, 61.32, 61.30, 58.99, 58.96, 58.91, 58.64, 58.56, 58.52, 58.51, 58.45, 58.41, 52.07; ESI-HRMS Calcd for C<sub>62</sub>H<sub>113</sub>N<sub>4</sub>O<sub>34</sub> [M+NH<sub>4</sub>]<sup>+</sup>: 1457.7231. Found 1457.7279; C<sub>62</sub>H<sub>109</sub>N<sub>3</sub>NaO<sub>34</sub> [M+Na]<sup>+</sup>: 1462.6785. Found 1462.6831; C<sub>62</sub>H<sub>109</sub>N<sub>3</sub>O<sub>34</sub>K [M+K]<sup>+</sup>: 1478.6519. Found 1478.6588.

#### 1.6 3β-hydroxy-11-oxo-18β-olean-12-en-30-oic acid benzyl ester (**36**)<sup>[6]</sup>

To a solution of glycyrrhetic acid **1** (1.05 g, 2.20 mmol) in DMF (20 mL) was added 367 mg of  $K_2CO_3$  (2.6 mmol) and 320  $\mu$ L benzyl bromide (2.60 mmol). The resulting solution was stirred vigorously for 24 h at 60°C. The solvent was removed by steaming. The residue was purified by reverse column chromatography to give 1.10 g (89%) of compound **36** as a white solid.  $R_f = 0.15$  (petroleum ether:ethyl acetate = 1:1);  $^1H$  NMR (400 MHz,  $CDCl_3$ ):  $\delta$  7.39–7.32 (m, 5H), 5.54 (s, 1H), 5.20 (d, 1H,  $J = 12.2$  Hz), 5.09 (d, 1H,  $J = 12.2$  Hz), 3.22 (dd, 1H,  $J = 10.6, 5.4$  Hz), 2.78 (td, 1H,  $J = 13.5, 3.6$  Hz), 2.31 (s, 1H), 2.03–0.92 (m, other aliphatic ring protons), 1.34, 1.15, 1.13, 1.10, 1.00, 0.80, 0.73 (s, each 3H,  $7 \times CH_3$ ), 0.68 (d, 1H,  $J = 10.1$  Hz);  $^{13}C$  NMR (100 MHz,  $CDCl_3$ ):  $\delta$  200.14, 176.21, 169.01, 136.13, 128.62, 128.53, 128.30, 128.25, 78.75, 66.23, 61.79, 54.94, 48.21, 45.35, 43.99, 43.17, 41.08, 39.14, 37.65, 37.07, 32.77, 31.78, 31.17, 28.42, 28.30, 28.11, 27.31, 26.47, 26.41, 23.36, 18.68, 17.49, 16.38, 15.60

Reference:

- [1] S. Schwarz, S.D. Lucas, S. Sommerwerk, R. Csuk, Amino derivatives of glycyrrhetic acid as potential inhibitors of cholinesterases, *Bioorg Med Chem* 22 (2014) 3370-3378.
- [2] I. Beseda, L. Czollner, P.S. Shah, R. Khunt, R. Gaware, et al., Synthesis of glycyrrhetic acid derivatives for the treatment of metabolic diseases, *Bioorg Med Chem* 18 (2010) 433-454.
- [3] D. Vizitiu, C.S. Walkinshaw, B.I. Gorin, G.R.J. Thatcher, Synthesis of monofacially functionalized cyclodextrins bearing amino pendent groups, *J. Org. Chem.* 62 (1997) 8760–8766.
- [4] F. Giacalone, F. D'Anna, R. Giacalone, M. Gruttadauria, S. Riela, Cyclodextrin-[6]fullerene conjugates: synthesis, characterization, and electrochemical behavior, *Tetrahedron Lett.* 47 (2006) 8105–8108.
- [5] S. Xiao, Q. Wang, L. Si, X. Zhou, Y. Zhang, et al., Synthesis and biological evaluation of novel pentacyclic triterpene alpha-cyclodextrin conjugates as HCV entry inhibitors, *Eur J Med Chem* 124 (2016) 1-9.
- [6] R.K. Wolfram, L. Heller, R. Csuk, Targeting mitochondria: Esters of rhodamine B with triterpenoids are mitocanic triggers of apoptosis, *Eur J Med Chem* 152 (2018) 21-30.



## 2. Selected $^1\text{H}$ , $^{13}\text{C}$ NMR and HRMS spectra

### $^1\text{H}$ NMR of compound **9**

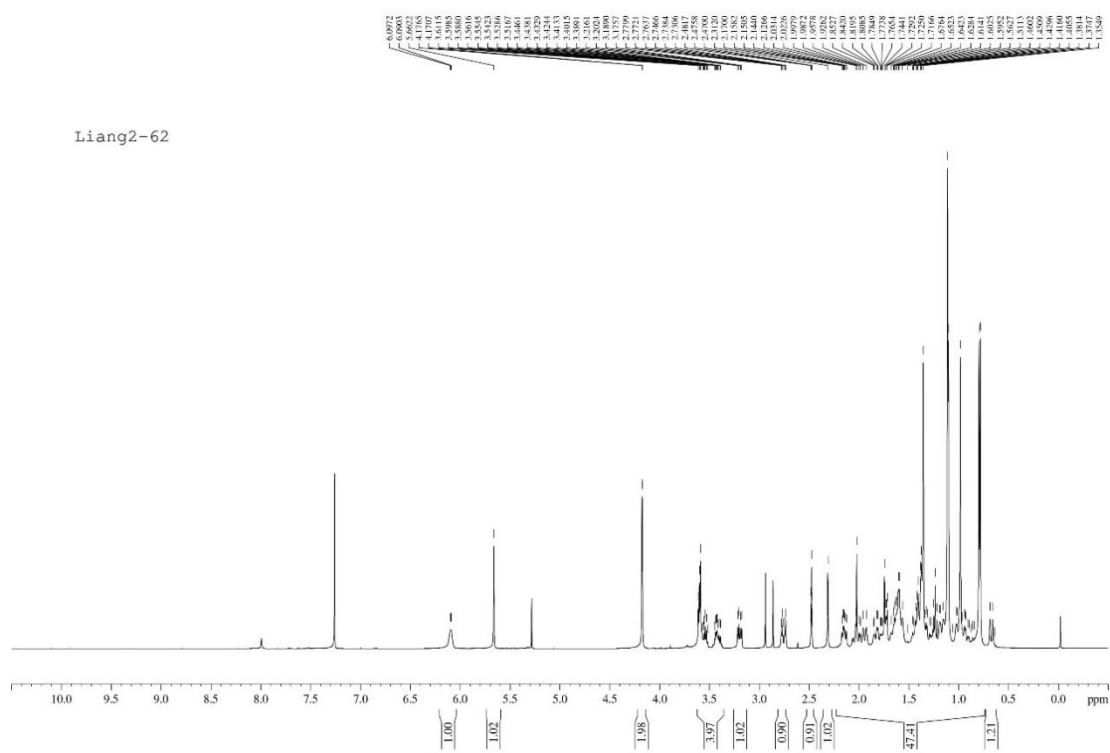

### $^{13}\text{C}$ NMR of compound **9**

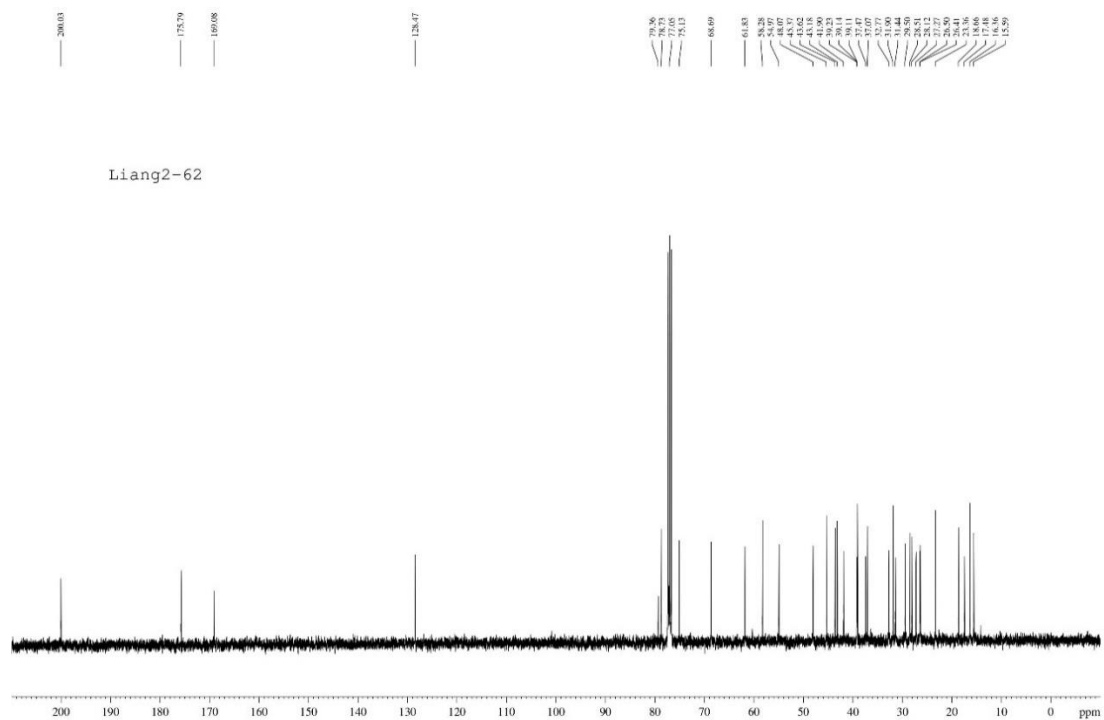



<sup>13</sup>C NMR of compound **10**

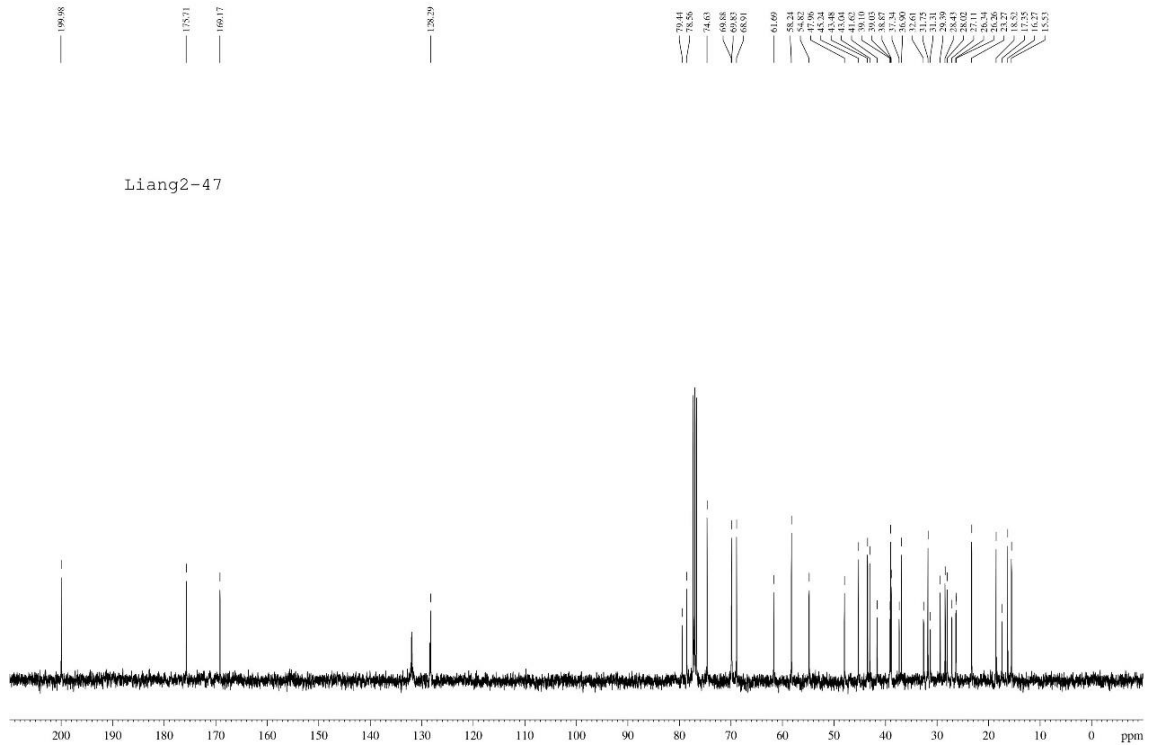

HRMS of compound **10**

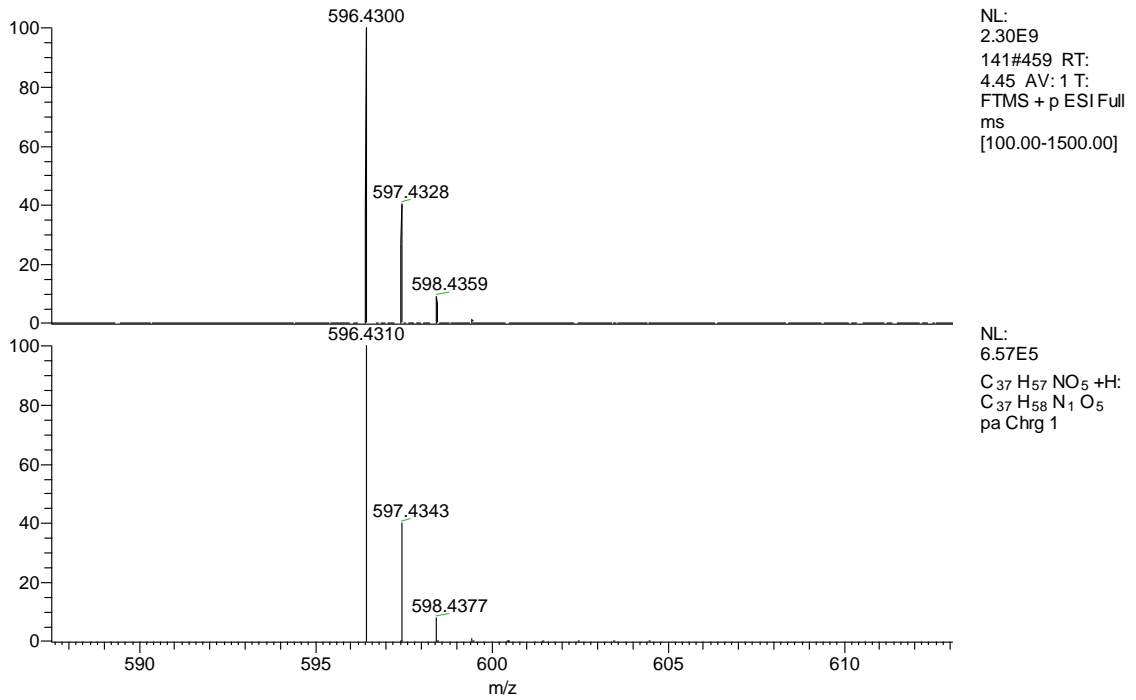

# <sup>1</sup>H NMR of compound 11

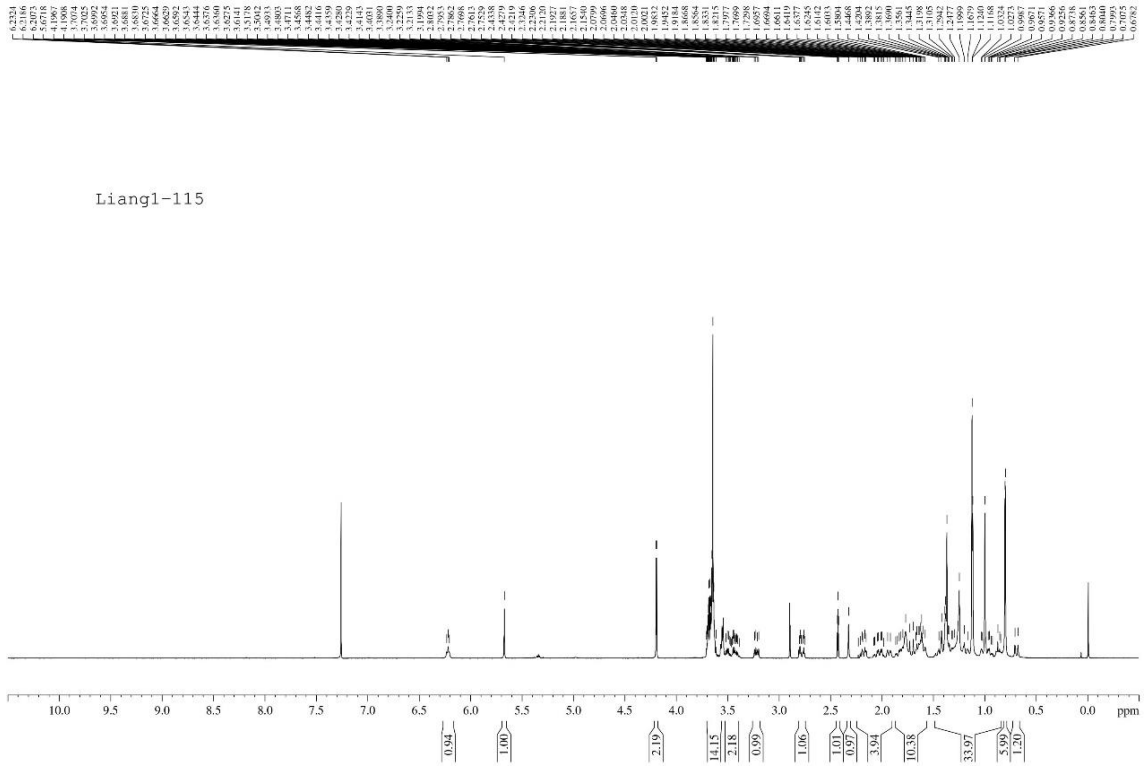

Liangl-115

# <sup>13</sup>C NMR of compound 11

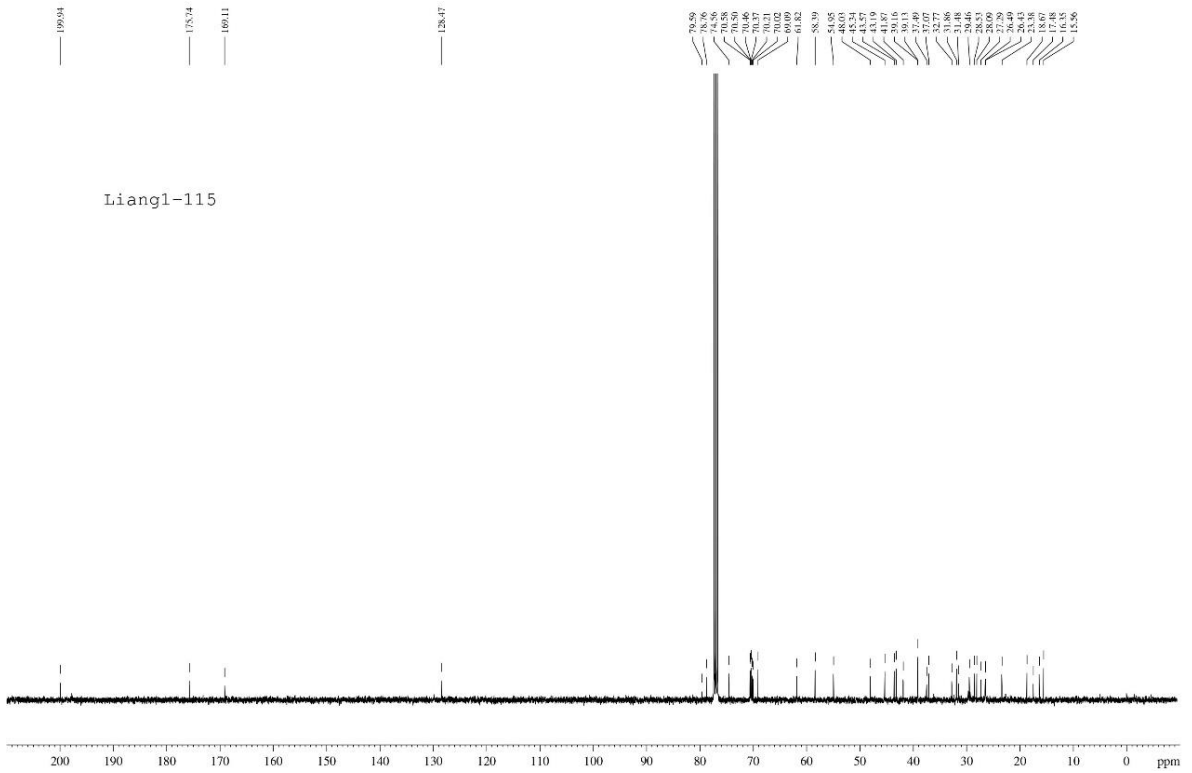

Liangl-115

### HRMS of compound 11

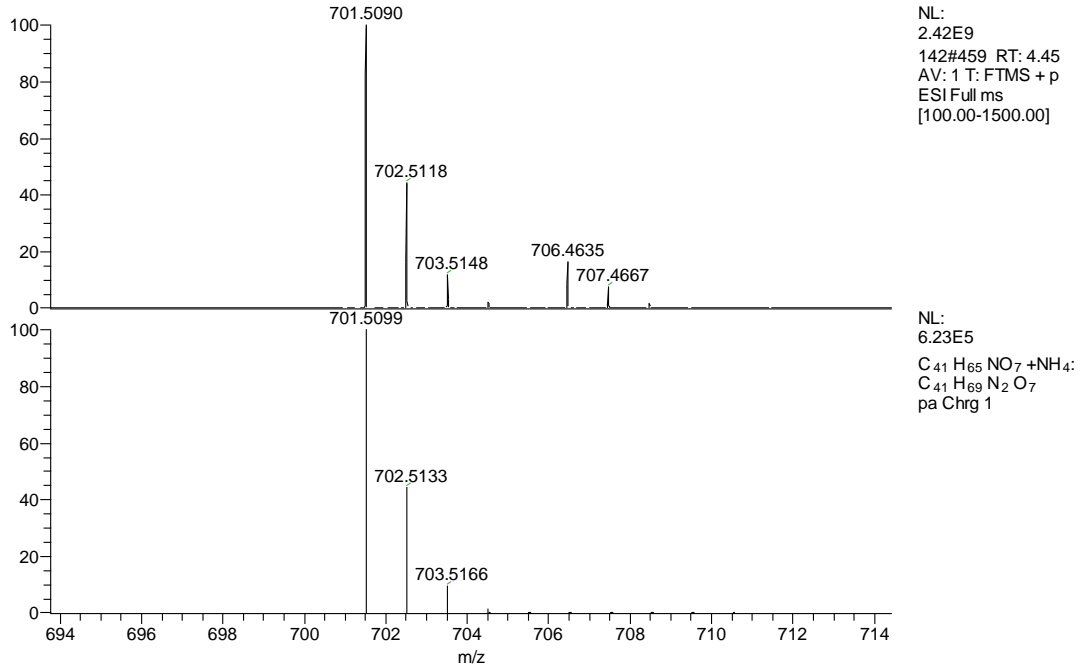

### <sup>1</sup>H NMR of compound 12

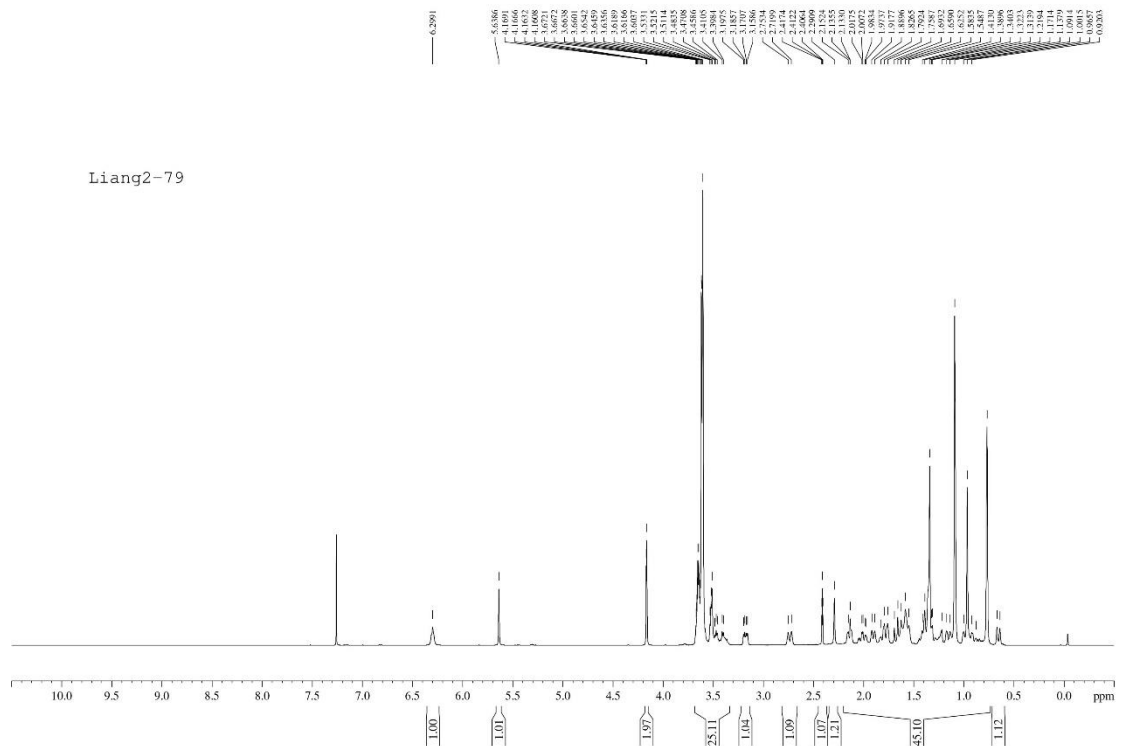

### <sup>13</sup>C NMR of compound **12**

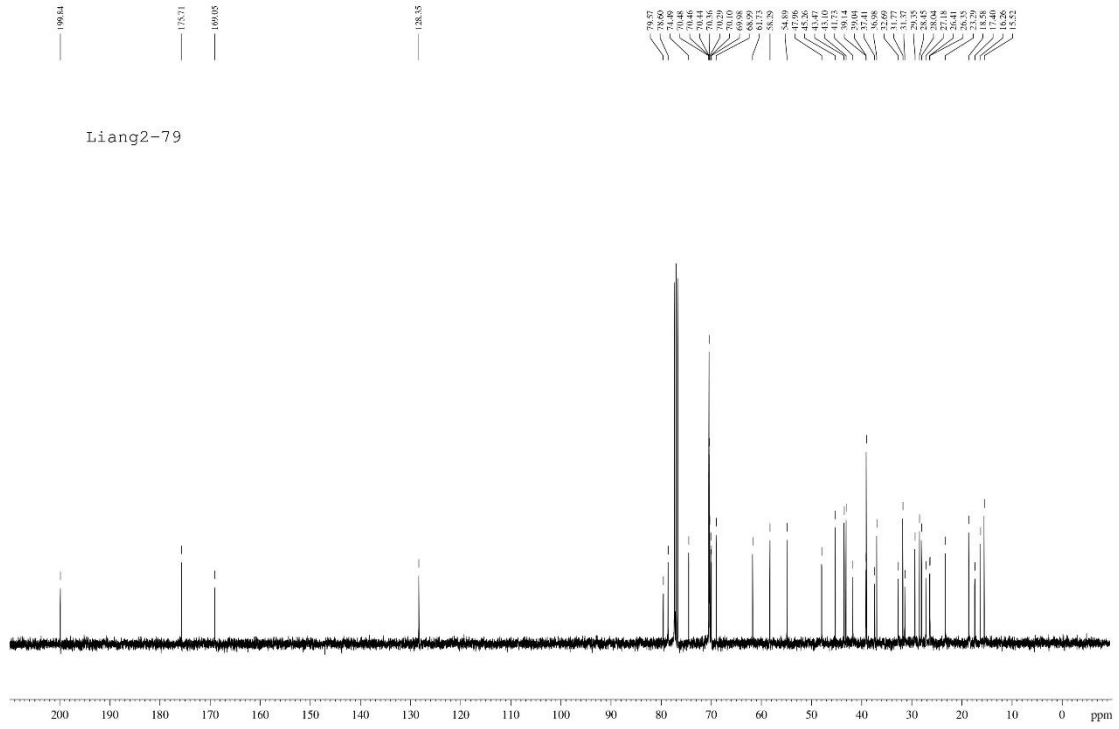

### HRMS of compound **12**

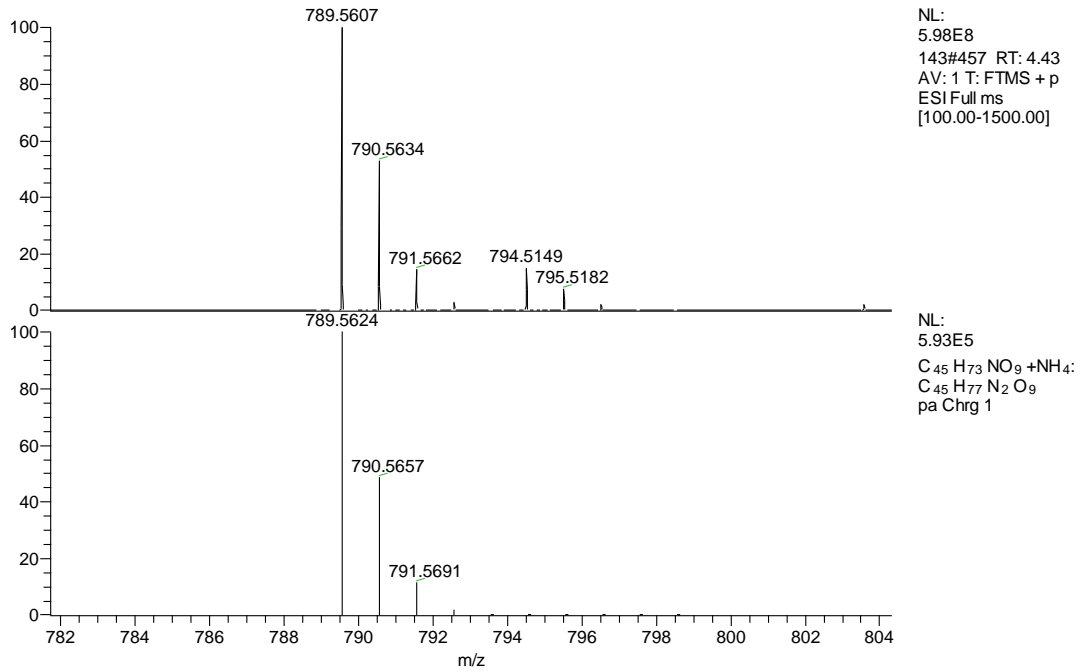



### HSQC of compound 18

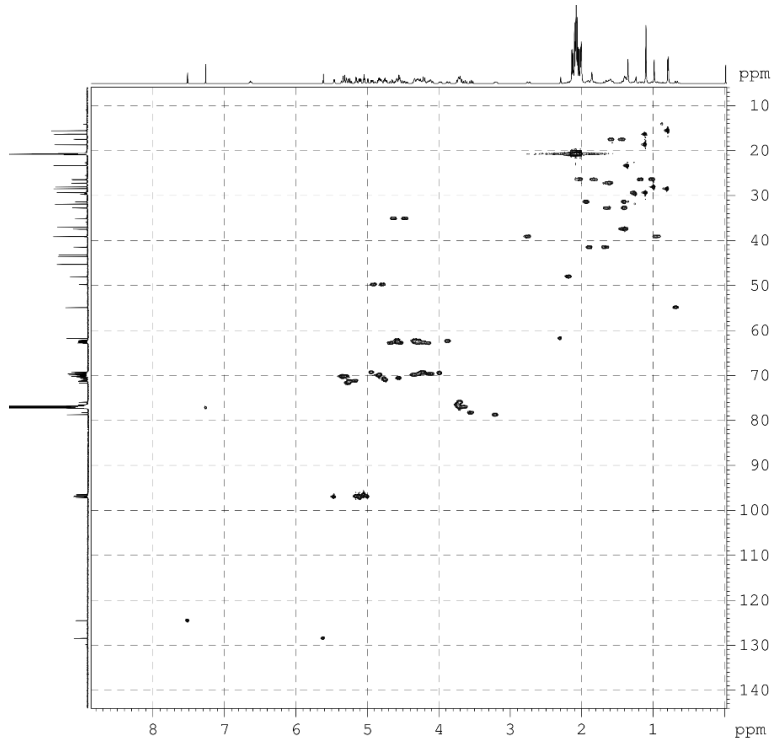

```
NAME      Liang2-125-hsqc
EXPNO     1
PROCNO    1
Date_     20190113
Time      11.19
INSTRUM   spect
PROBHD    5 mm PADUL 13C
PULPROG   hsqcetgp
TD         2048
SOLVENT   CDCl3
NS         6
DS         16
SWH        5341.880
FIDRES    2.608340
AQ         0.1917428
RG         2050
DW         93.600
DE         6.50
TE         196.6
```

### H-H COSY of compound 18

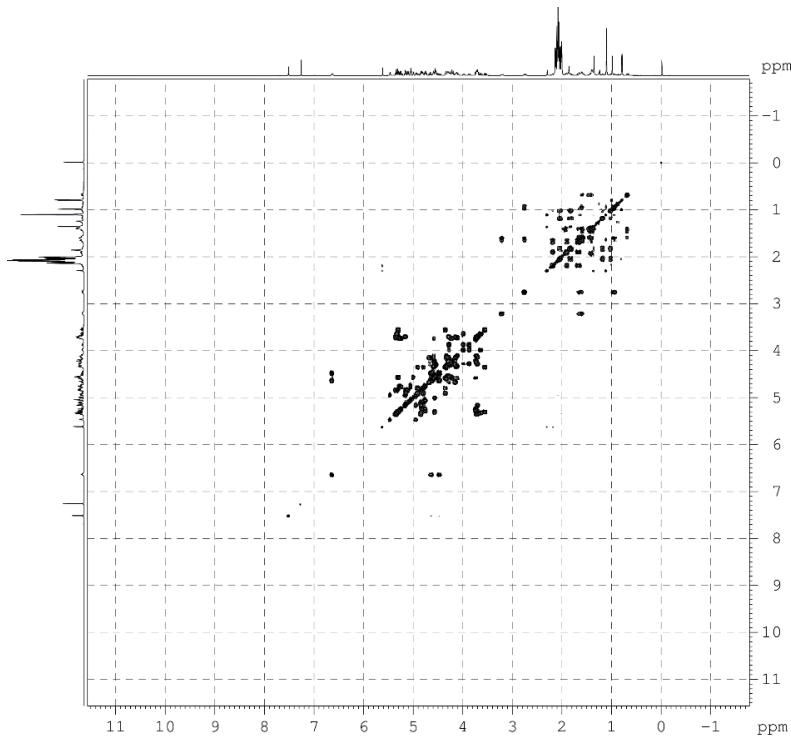

```
NAME      Liang2-125-cosh
EXPNO     1
PROCNO    1
Date_     20190119
Time      20.36
INSTRUM   spect
PROBHD    5 mm PADUL 13C
PULPROG   cosygpmfqq
TD         2048
SOLVENT   CDCl3
NS         6
DS         16
SWH        5341.880
FIDRES    2.608340
AQ         0.1917428
RG         2050
DW         93.600
DE         6.50
TE         195.8
```



### HRMS of compound 18

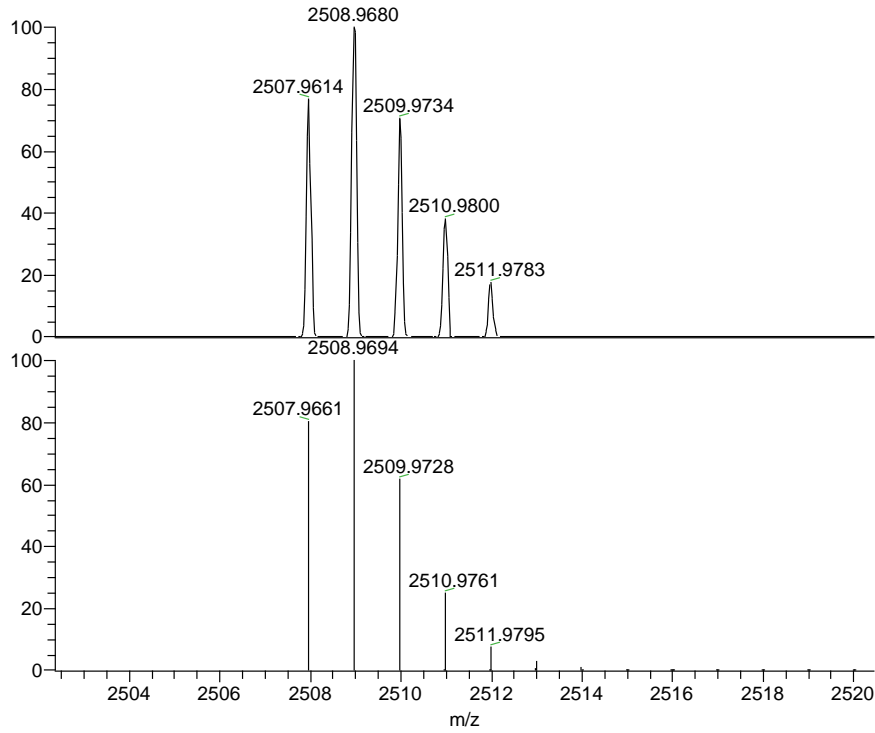

NL:  
1.84E6  
122\_180824220059#5  
15 RT: 5.01 AV: 1 T:  
FTMS + p ESI Full ms  
[200.00-3000.00]

NL:  
3.04E5  
C<sub>115</sub>H<sub>158</sub>N<sub>4</sub>O<sub>57</sub> +H:  
C<sub>115</sub>H<sub>159</sub>N<sub>4</sub>O<sub>57</sub>  
pa Chrg 1

### <sup>1</sup>H NMR of compound 19

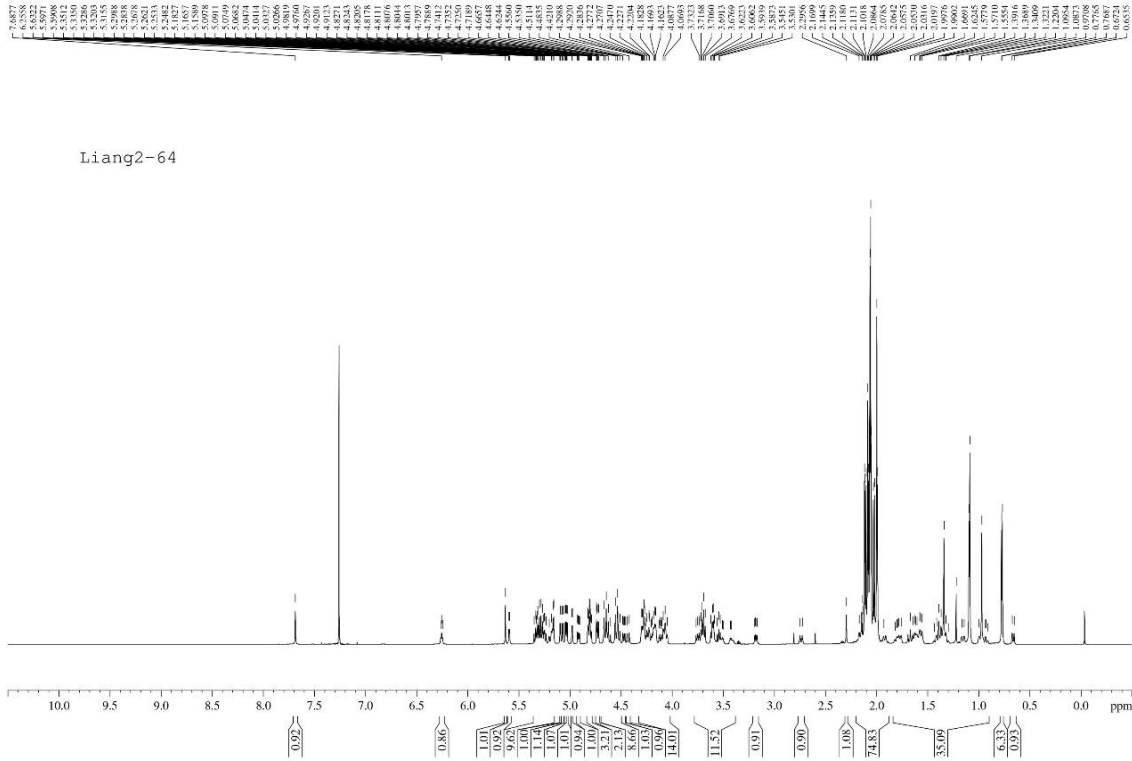

Liang2-64

<sup>13</sup>C NMR of compound **19**

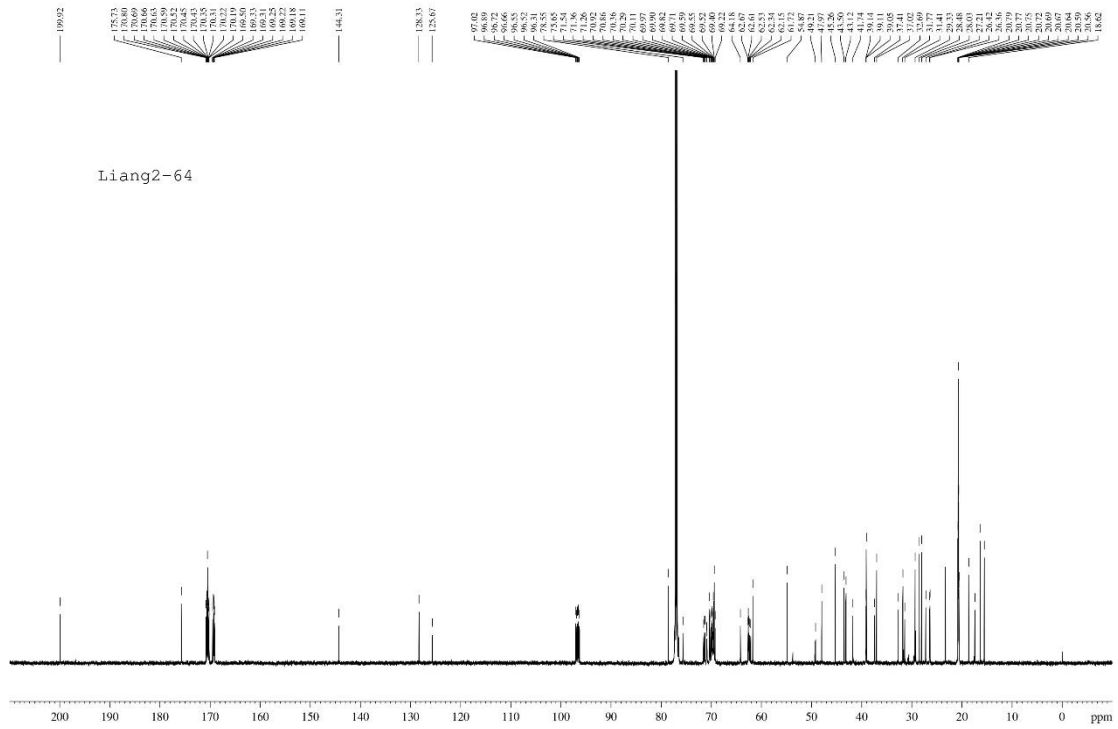

HSQC of compound **19**

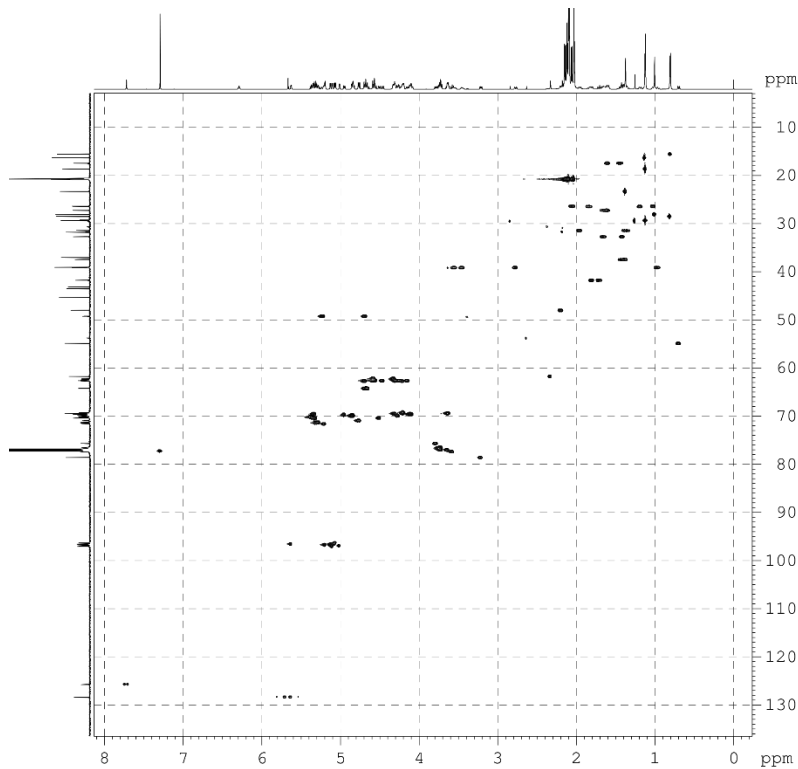

|         |                |
|---------|----------------|
| NAME    | Liang2-64      |
| EXPNO   | 4              |
| PROCNO  | 1              |
| Date_   | 20180413       |
| Time    | 15.06          |
| INSTRUM | spect          |
| PROBHD  | 5 mm CPTCI 1H- |
| PULPROG | hsqcetgp       |
| TD      | 2048           |
| SOLVENT | CDCl3          |
| NS      | 8              |
| DS      | 16             |
| SWH     | 5647.590       |
| FIDRES  | 2.757612       |
| AQ      | 0.1813663      |
| RG      | 203            |
| DW      | 88.533         |
| DE      | 10.00          |
| TE      | 300.4          |

# HRMS of compound 19

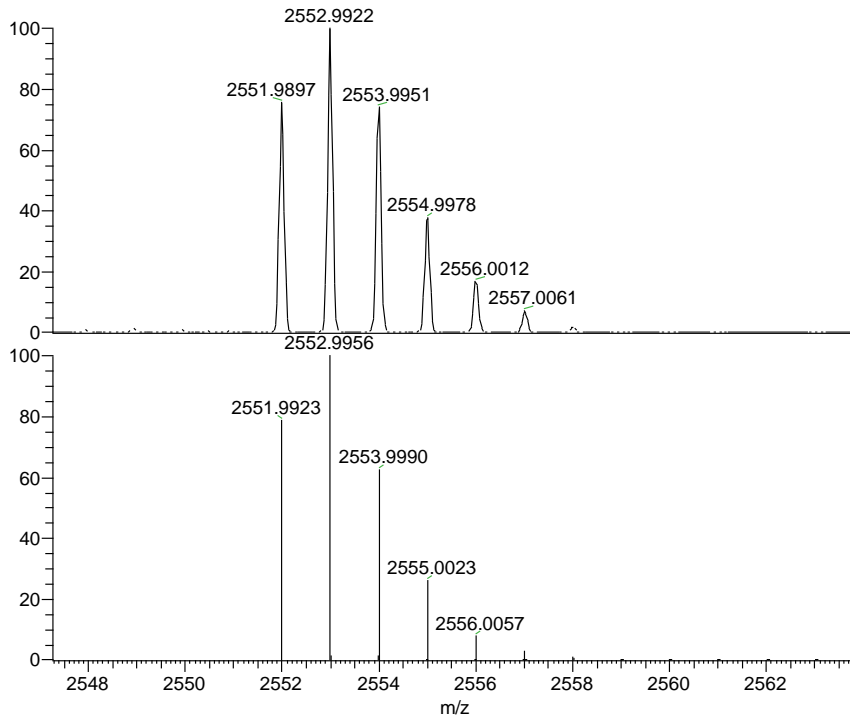

NL:  
1.64E7  
123\_180824173235#4  
77 RT: 4.63 AV: 1 T:  
FTMS + p ESI Full ms  
[200.00-3000.00]

NL:  
3.02E5  
C<sub>117</sub>H<sub>162</sub>N<sub>4</sub>O<sub>58</sub> +H:  
C<sub>117</sub>H<sub>163</sub>N<sub>4</sub>O<sub>58</sub>  
pa Chrg 1

# <sup>1</sup>H NMR of compound 20

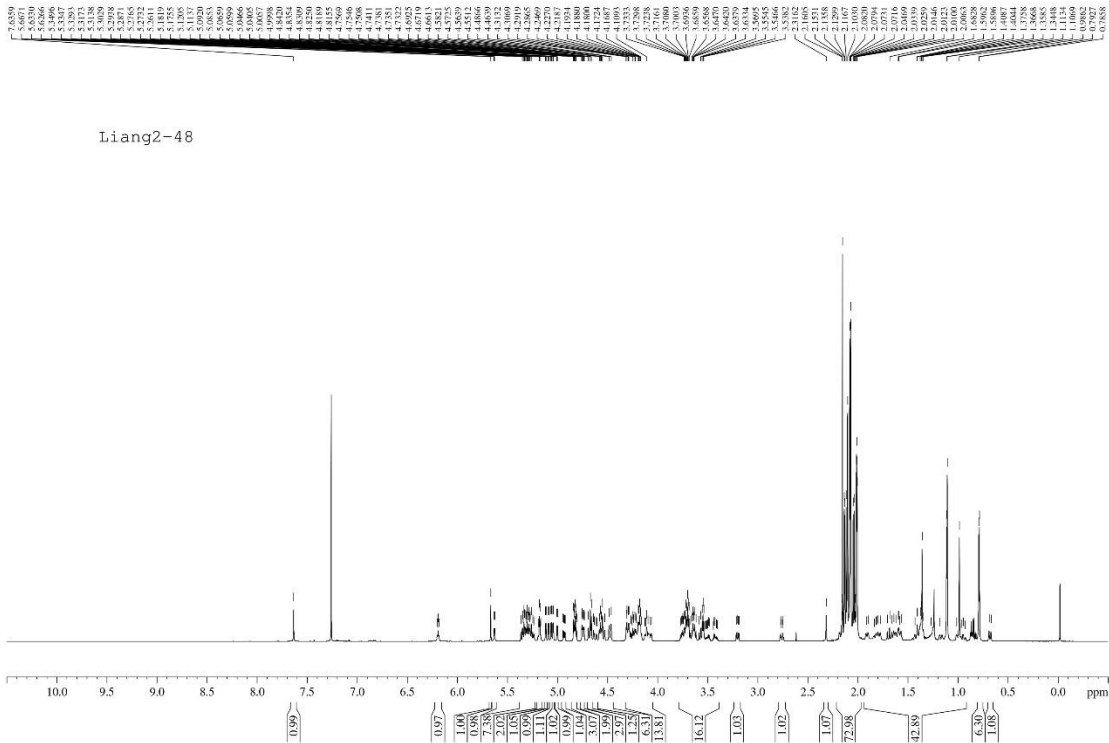



### HRMS of compound 20

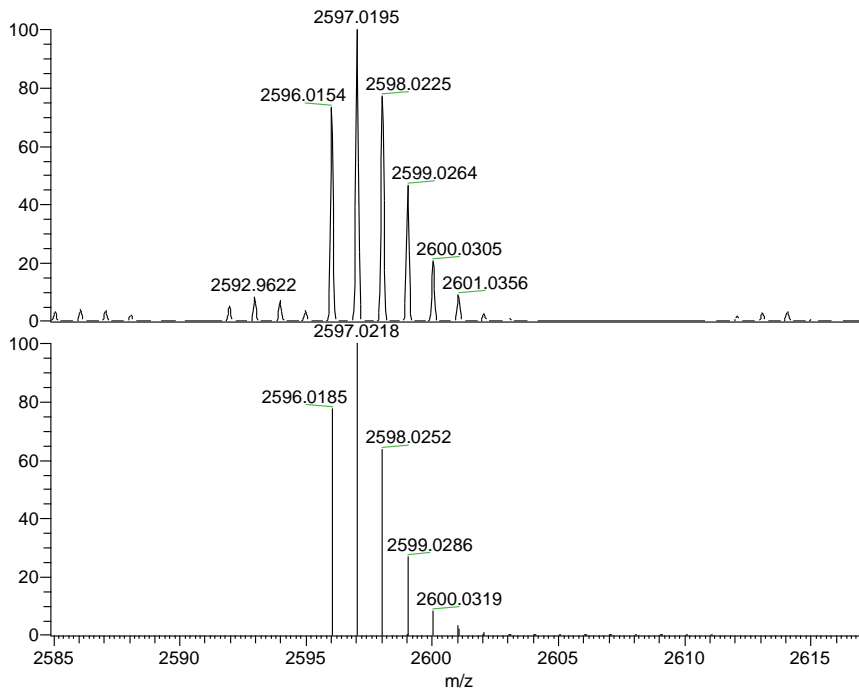

NL:  
2.09E6  
124\_180824173930#4  
73 RT: 4.62 AV: 1 T:  
FTMS + p ESI Full ms  
[200.00-3000.00]

NL:  
3.00E5  
C 119 H 166 N 4 O 59 +H:  
C 119 H 167 N 4 O 59  
pa Chrg 1

### <sup>1</sup>H NMR of compound 21

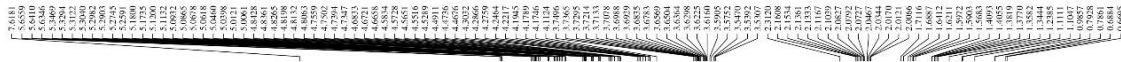

Liang1-136

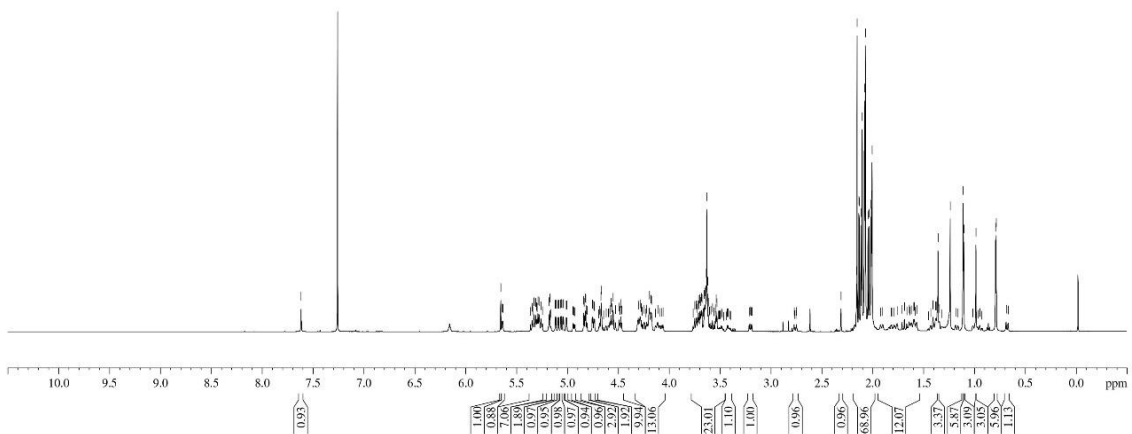

### <sup>13</sup>C NMR of compound 21

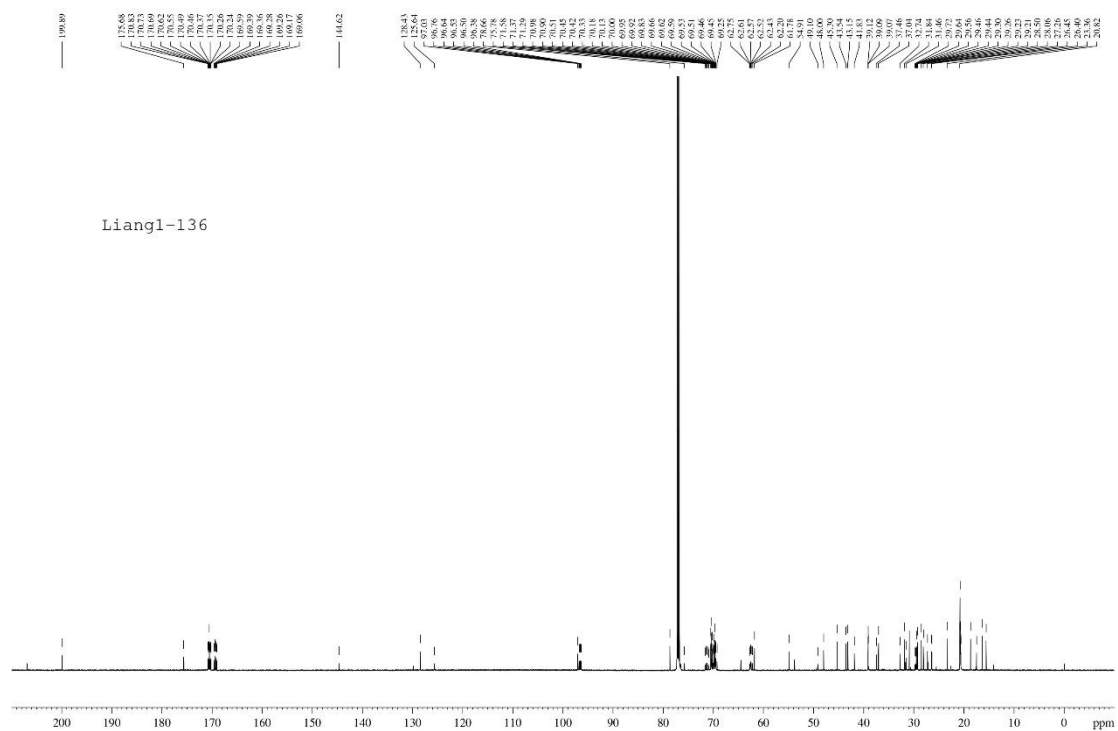

### HSQC of compound 21

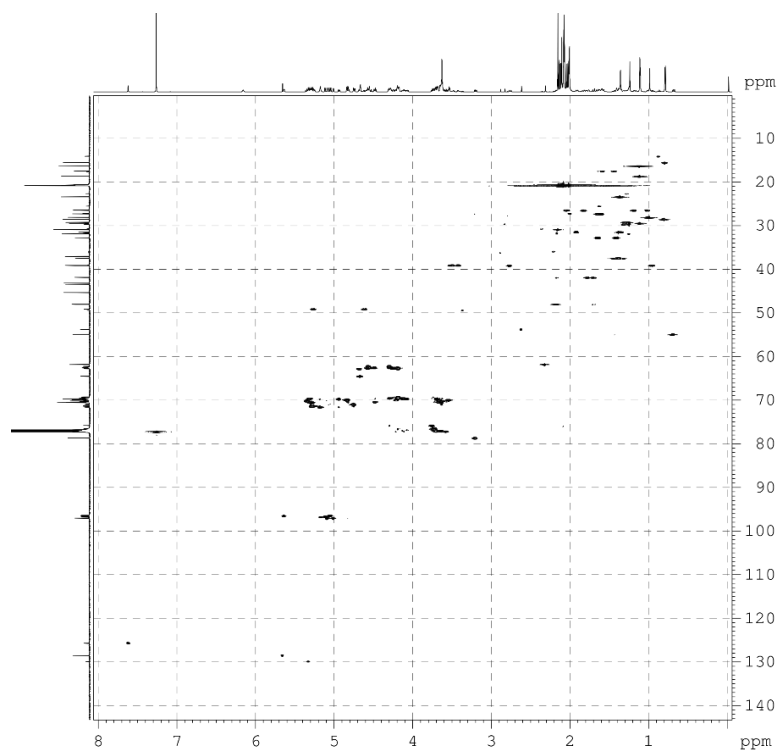

|         |                |
|---------|----------------|
| NAME    | Liang1-136     |
| EXPNO   | 4              |
| PROCNO  | 1              |
| Date_   | 20171117       |
| Time    | 11.59          |
| INSTRUM | spect          |
| PROBHD  | 5 mm CPTCI 1H- |
| PULPROG | hsqcetgpsi     |
| TD      | 2048           |
| SOLVENT | CDC13          |
| NS      | 4              |
| DS      | 16             |
| SWH     | 5980.861       |
| FIDRES  | 2.920342       |
| AQ      | 0.1712628      |
| RG      | 203            |
| DW      | 83.600         |
| DE      | 10.00          |
| TE      | 300.4          |

### HRMS of compound 21

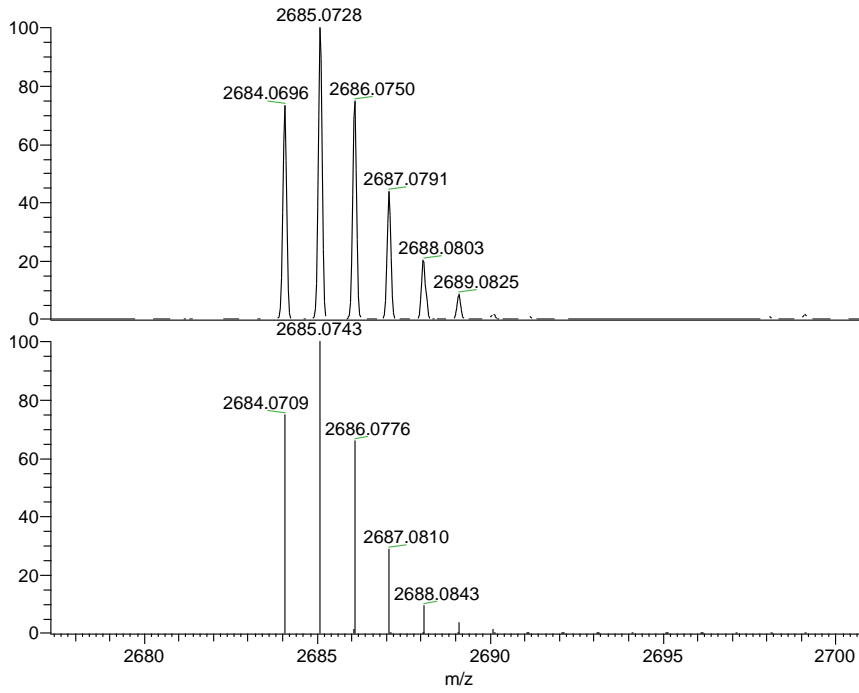

NL:  
4.39E7  
125\_180824174624#4  
69 RT: 4.58 AV: 1 T:  
FTMS + p ESI Full ms  
[200.00-3000.00]

NL:  
2.95E5  
C<sub>123</sub>H<sub>174</sub>N<sub>4</sub>O<sub>61</sub> +H:  
C<sub>123</sub>H<sub>175</sub>N<sub>4</sub>O<sub>61</sub>  
pa Chrg 1

### <sup>1</sup>H NMR of compound 22

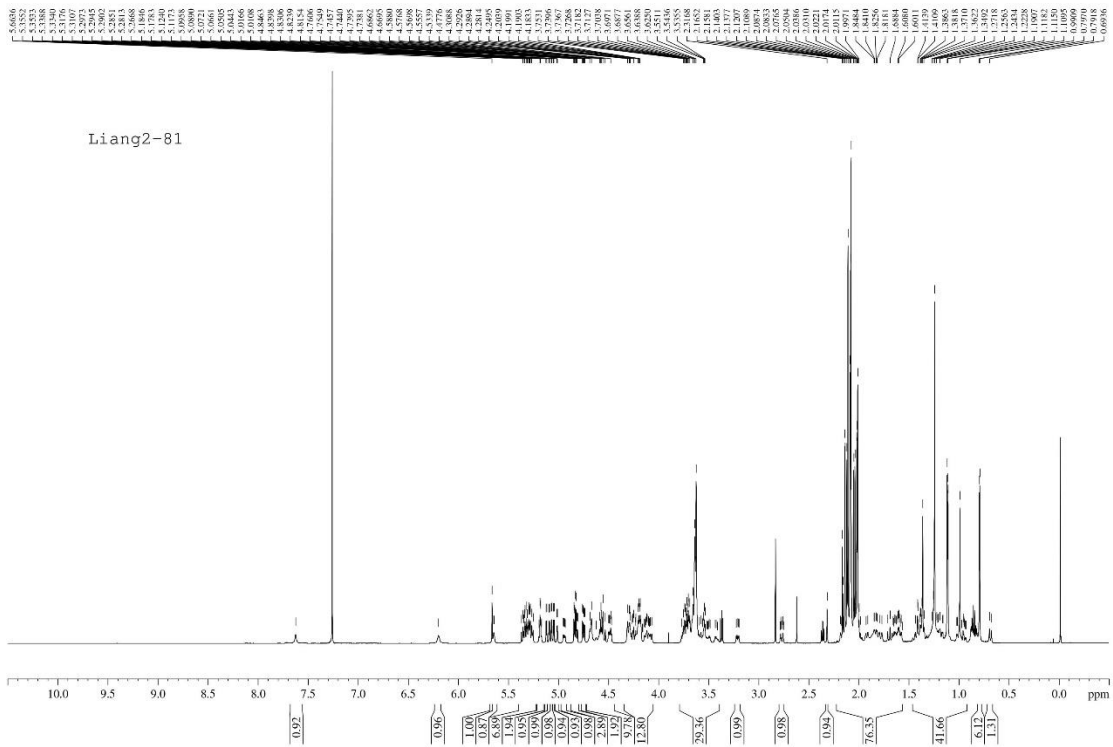





### HRMS of compound 22

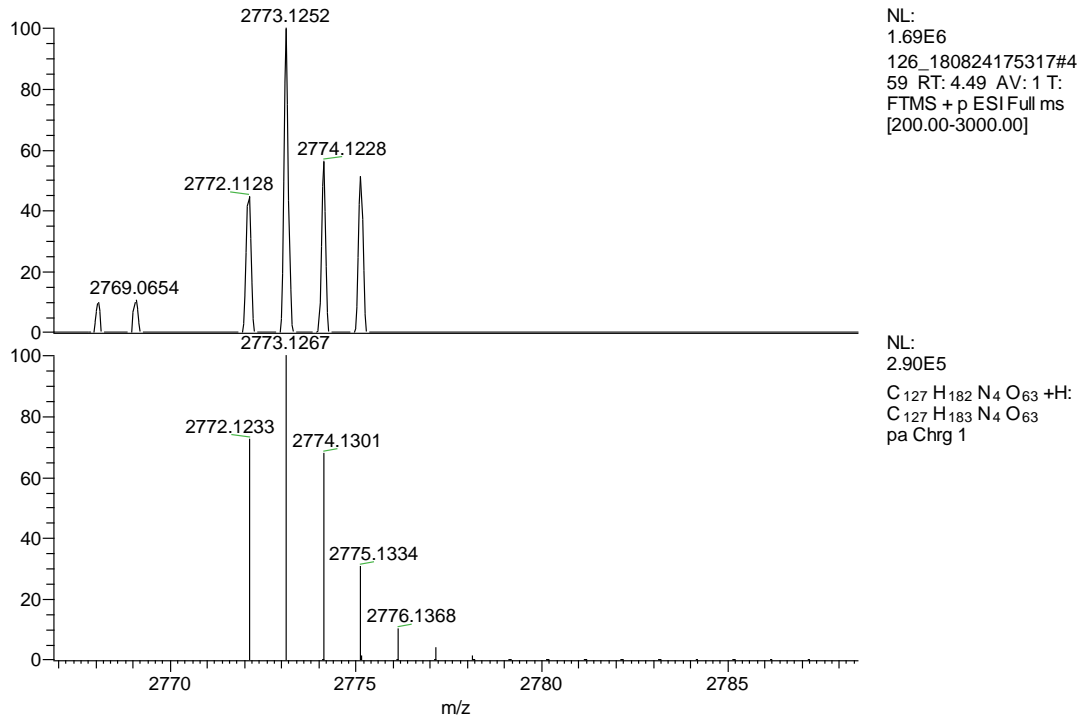

### <sup>1</sup>H NMR of compound 23

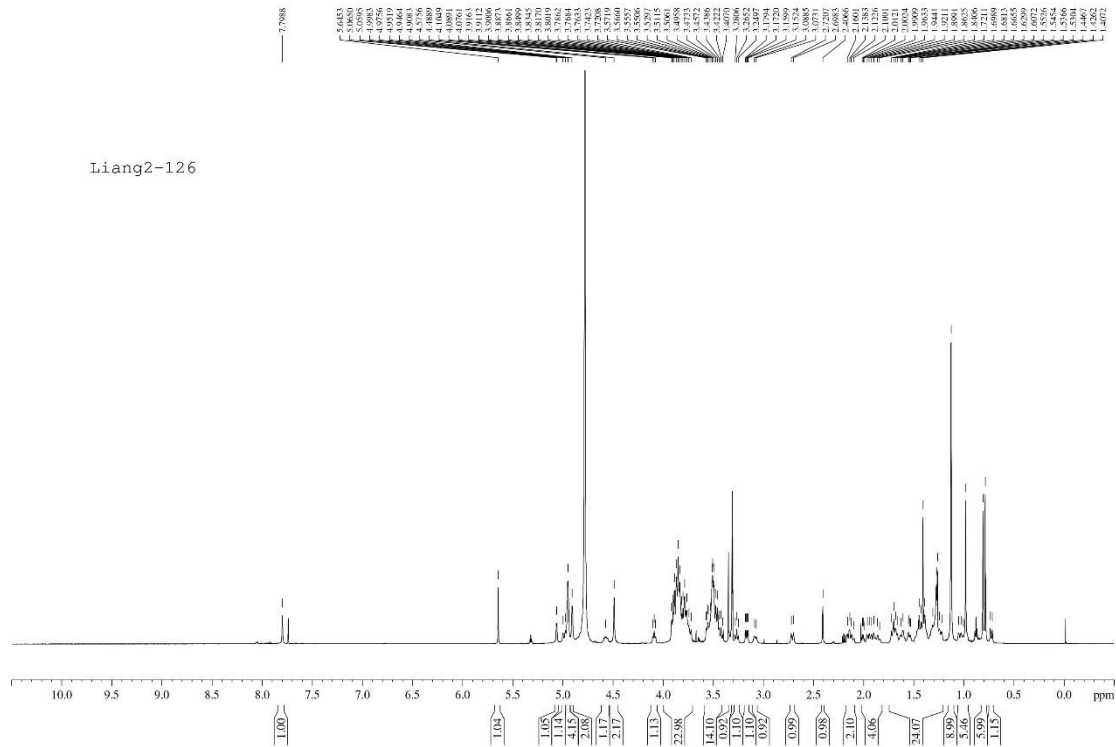

<sup>13</sup>C NMR of compound 23

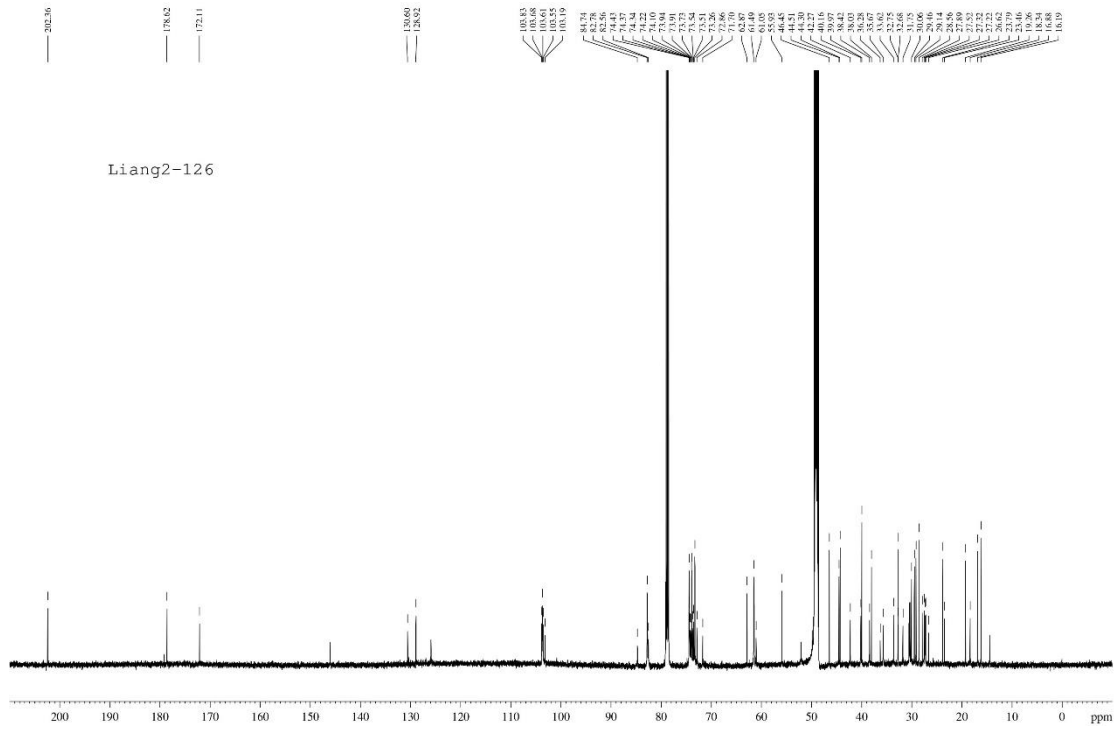

HSQC of compound 23

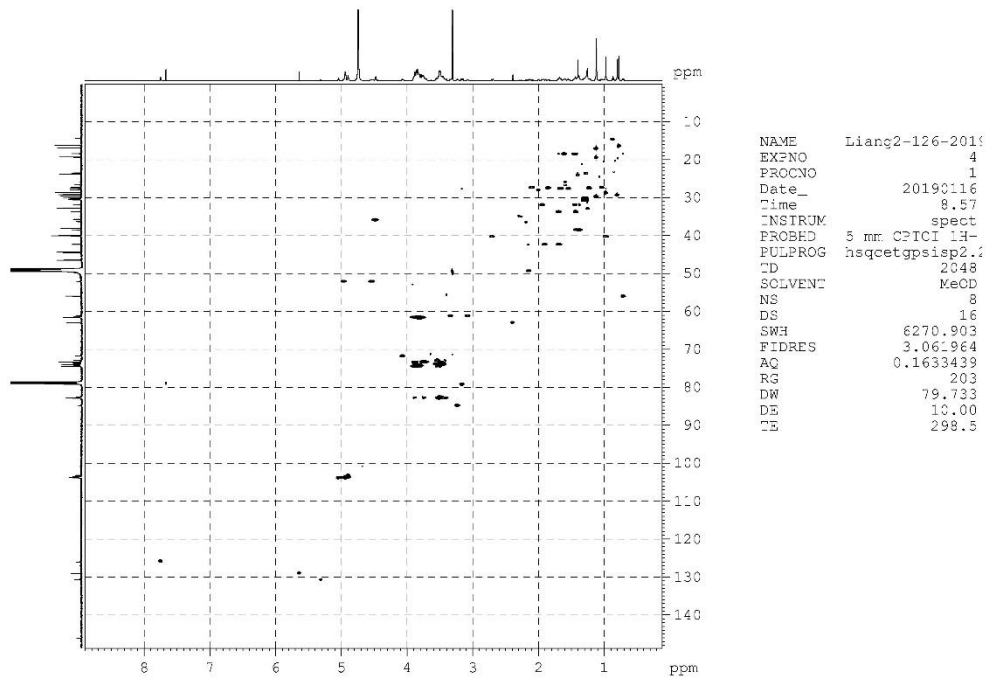

### HRMS of compound 23

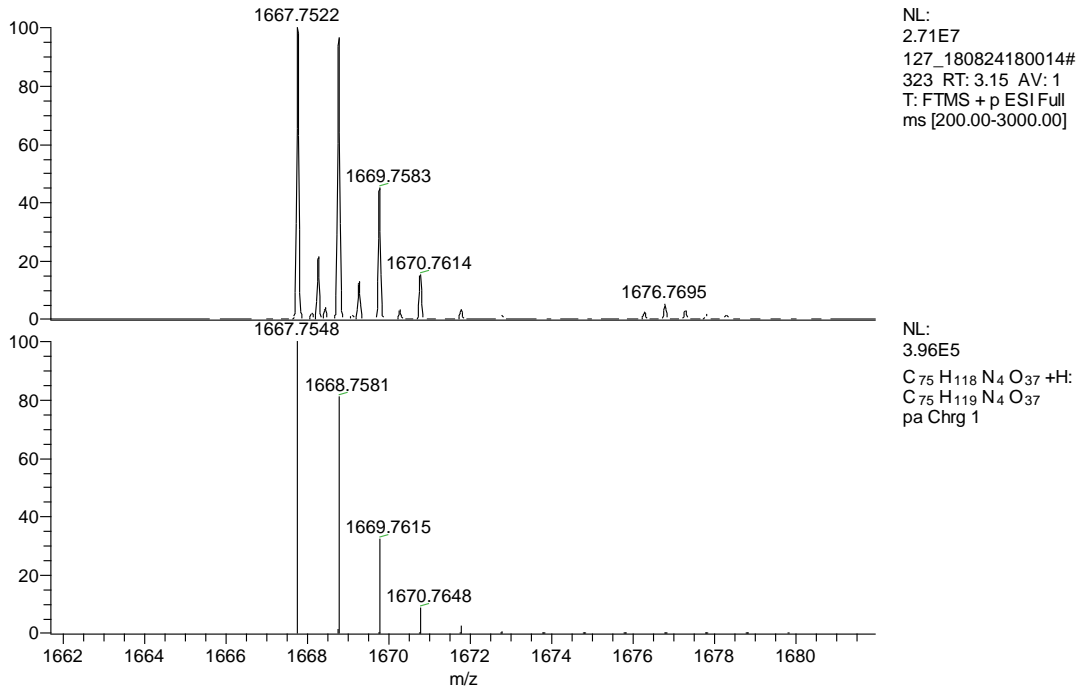

### <sup>1</sup>H NMR of compound 24

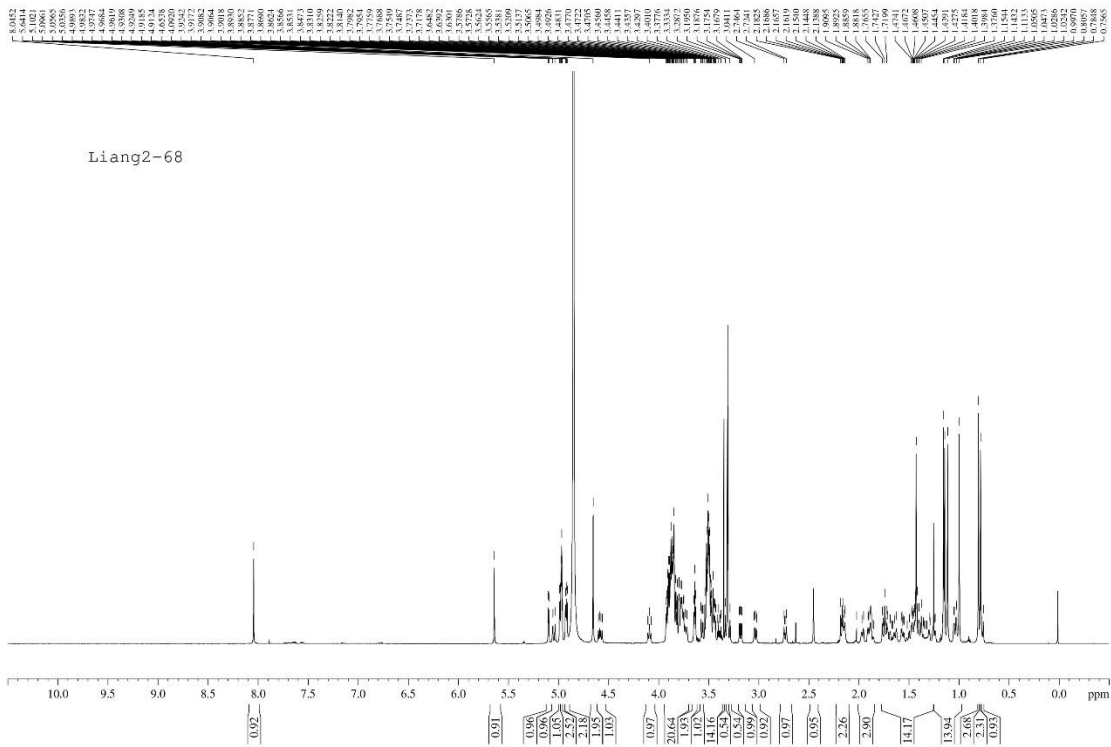

### <sup>13</sup>C NMR of compound 24

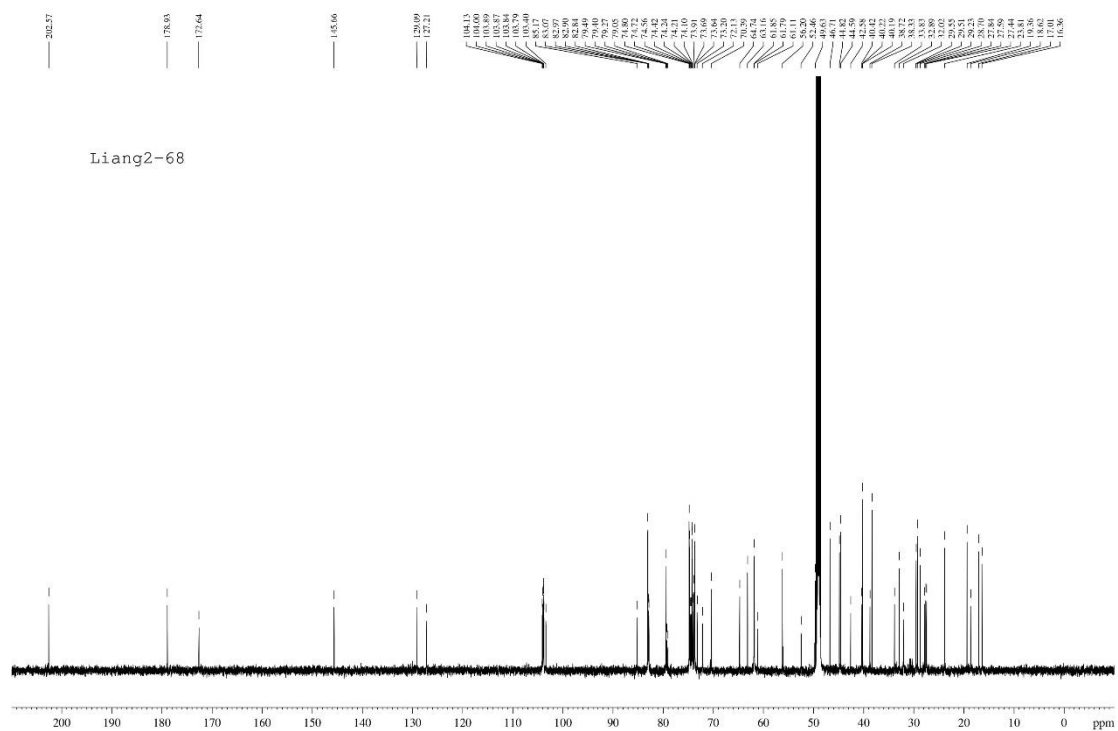

### HSQC of compound 24

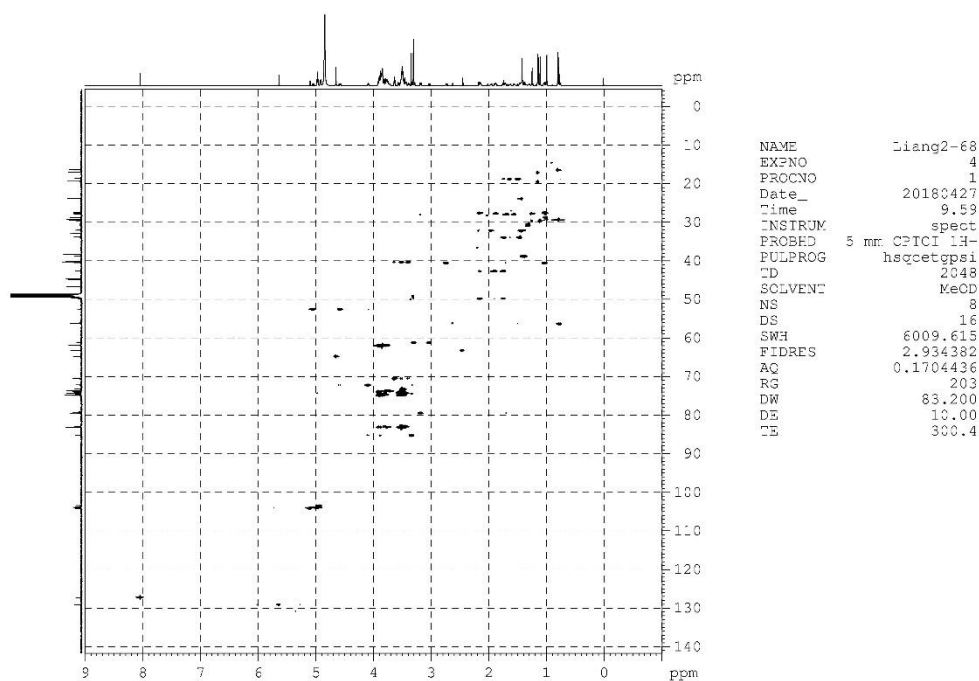

### HRMS of compound 24

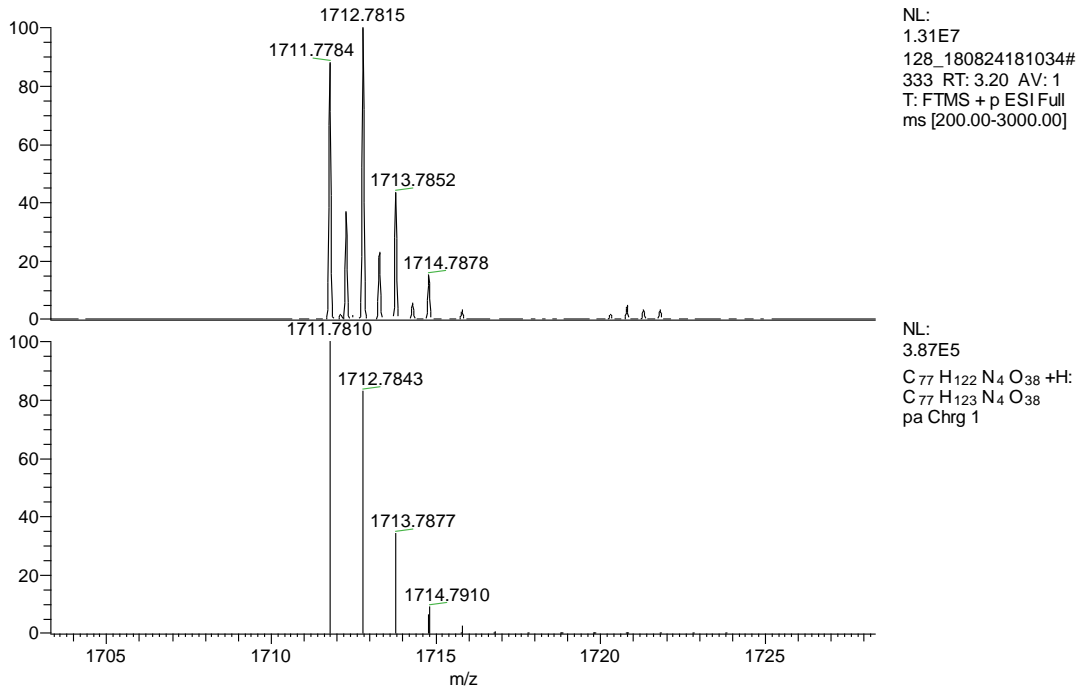

### <sup>1</sup>H NMR of compound 25

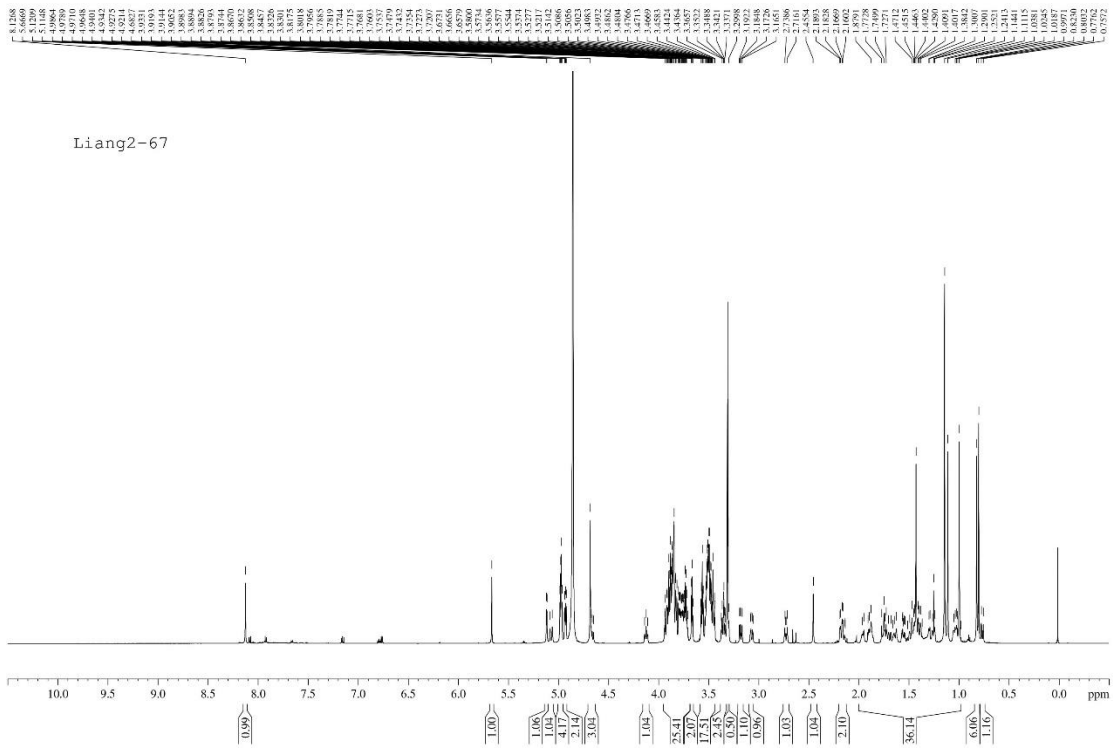



HRMS of compound 25

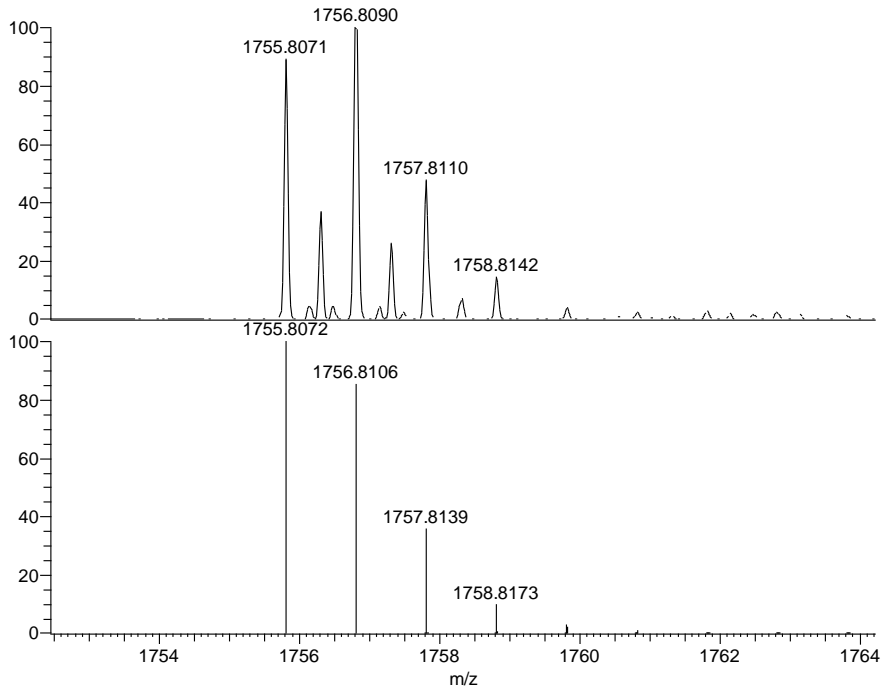

NL:  
6.37E7  
129\_180824181732#  
285 RT: 2.75 AV: 1  
T: FTMS + p ESI Full  
ms [200.00-3000.00]

NL:  
3.78E5  
C<sub>79</sub> H<sub>126</sub> N<sub>4</sub> O<sub>39</sub> +H:  
C<sub>79</sub> H<sub>127</sub> N<sub>4</sub> O<sub>39</sub>  
pa Chrg 1

<sup>1</sup>H NMR of compound 26

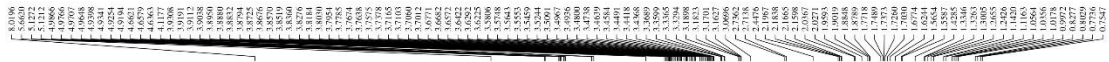

Liang2-18

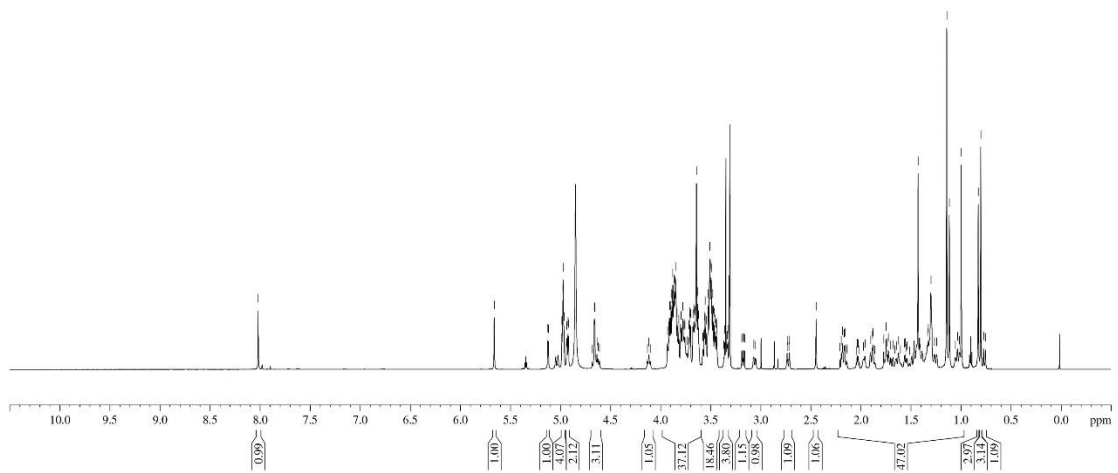





# HRMS of compound 26

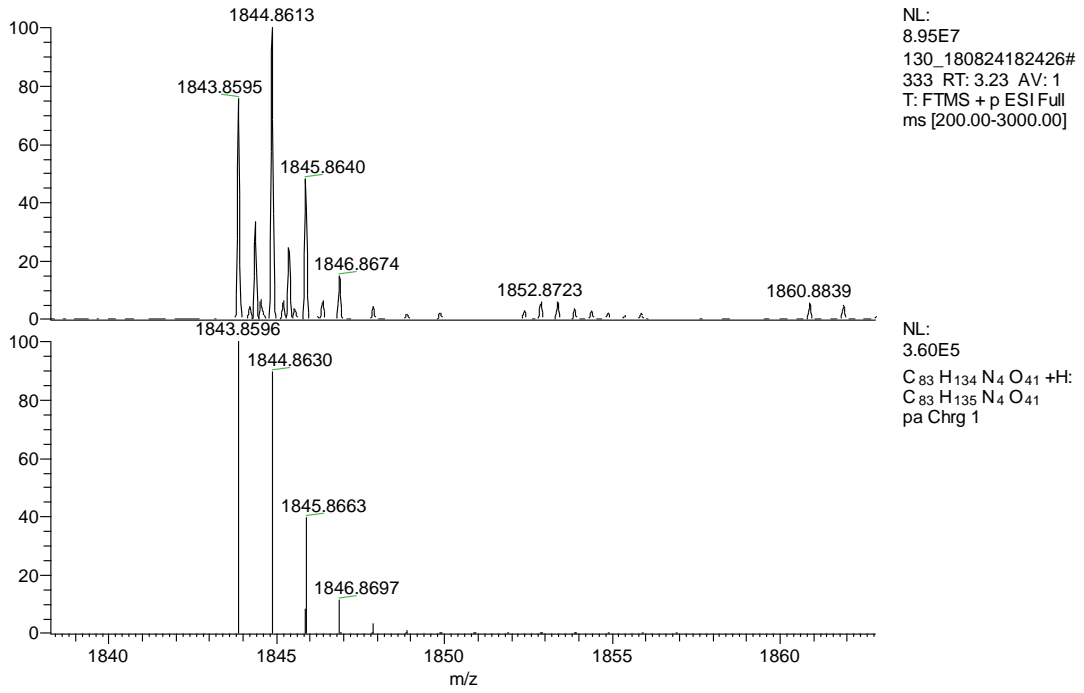

# <sup>1</sup>H NMR of compound 27

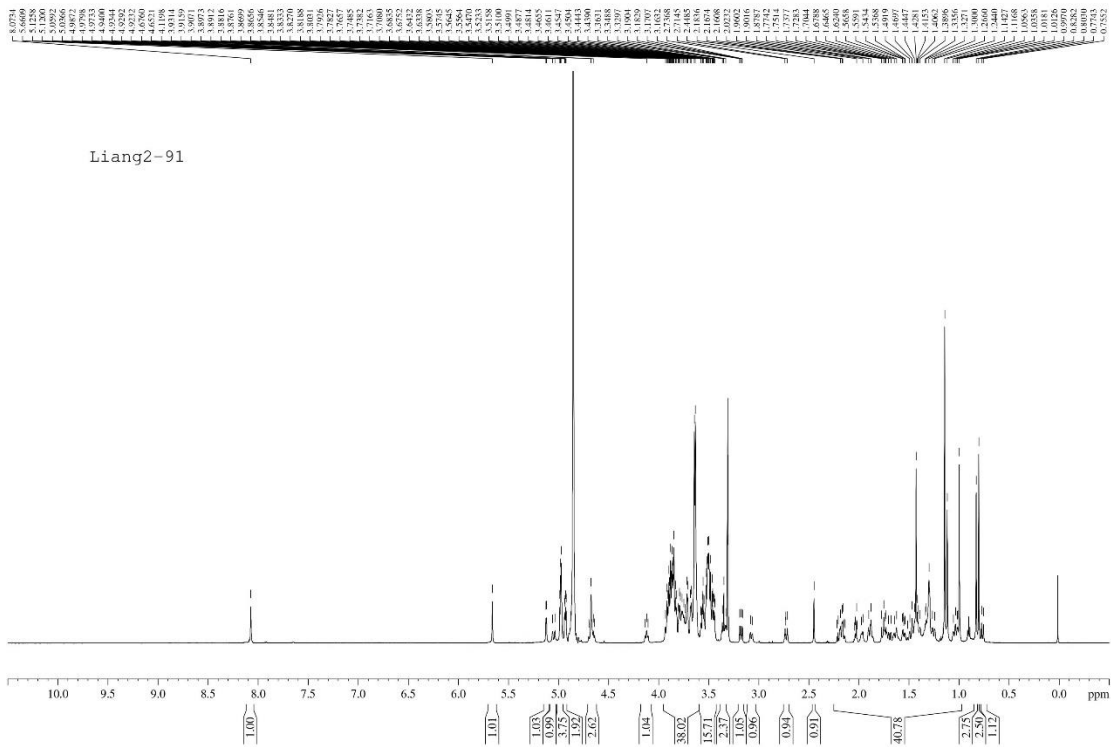

### <sup>13</sup>C NMR of compound 27

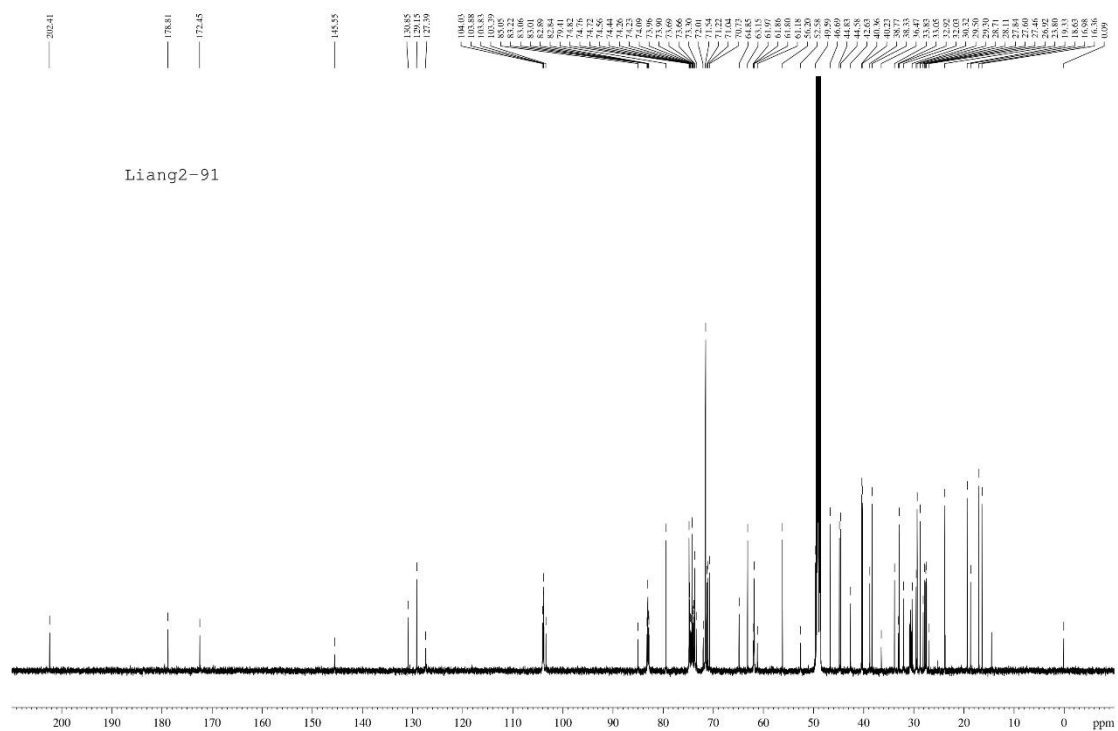

Liang2-91

### HSQC of compound 27

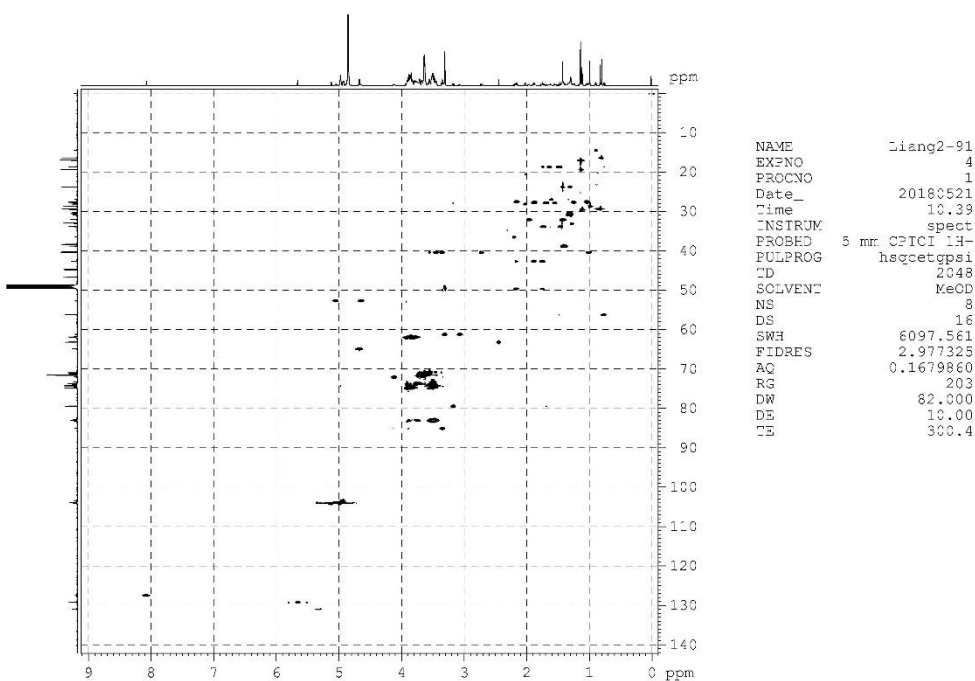

### HRMS of compound 27

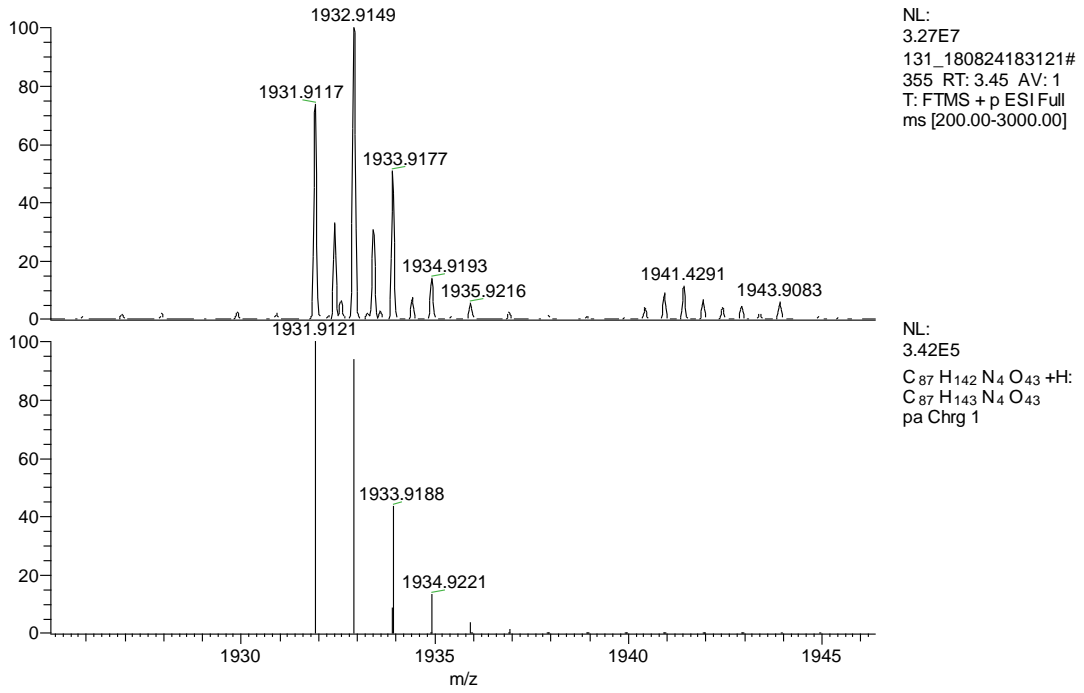

### <sup>1</sup>H NMR of compound 28

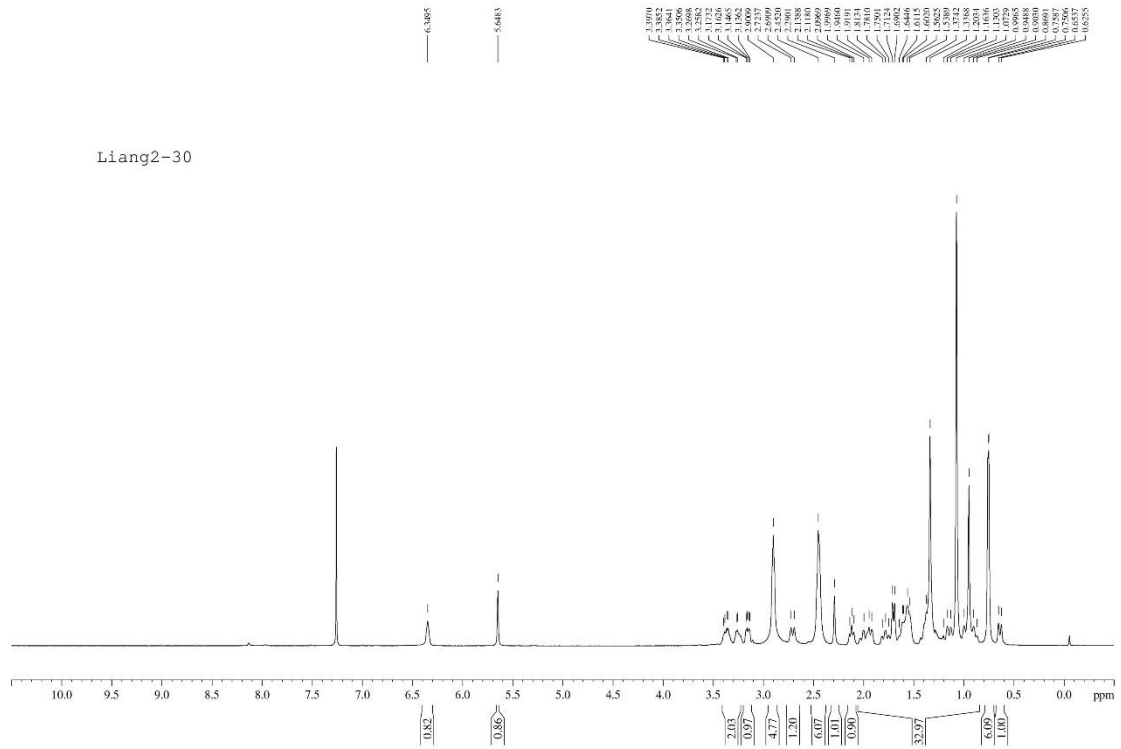

### <sup>13</sup>C NMR of compound 28

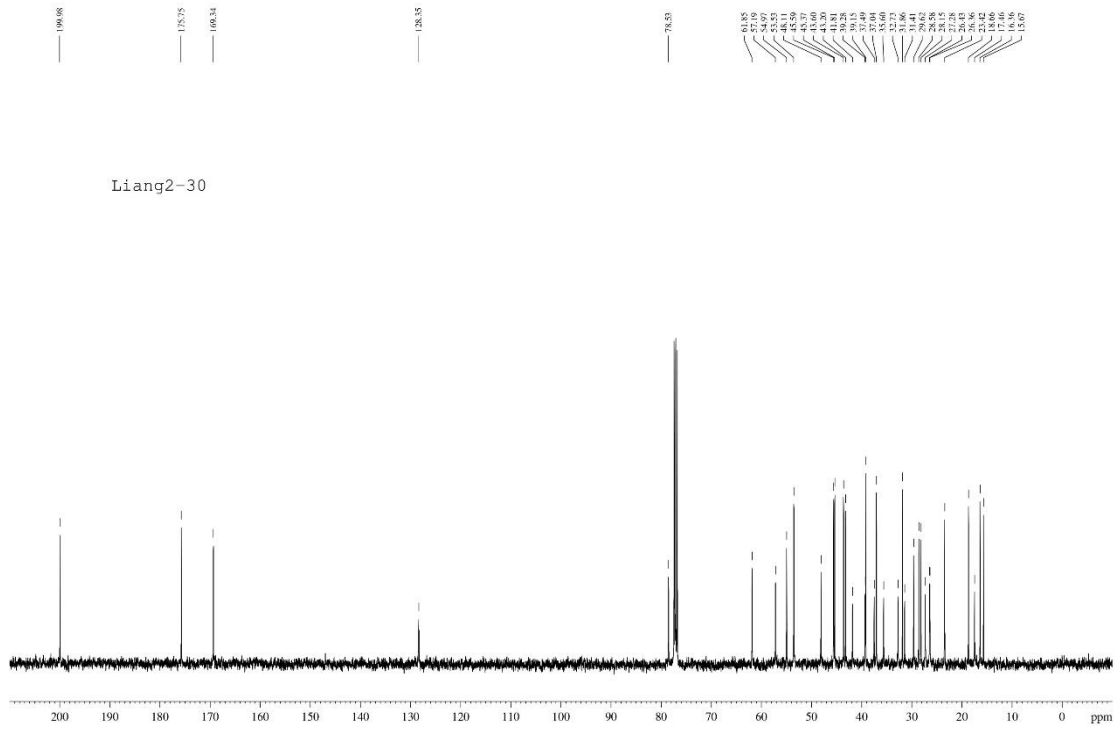

### HRMS of compound 28

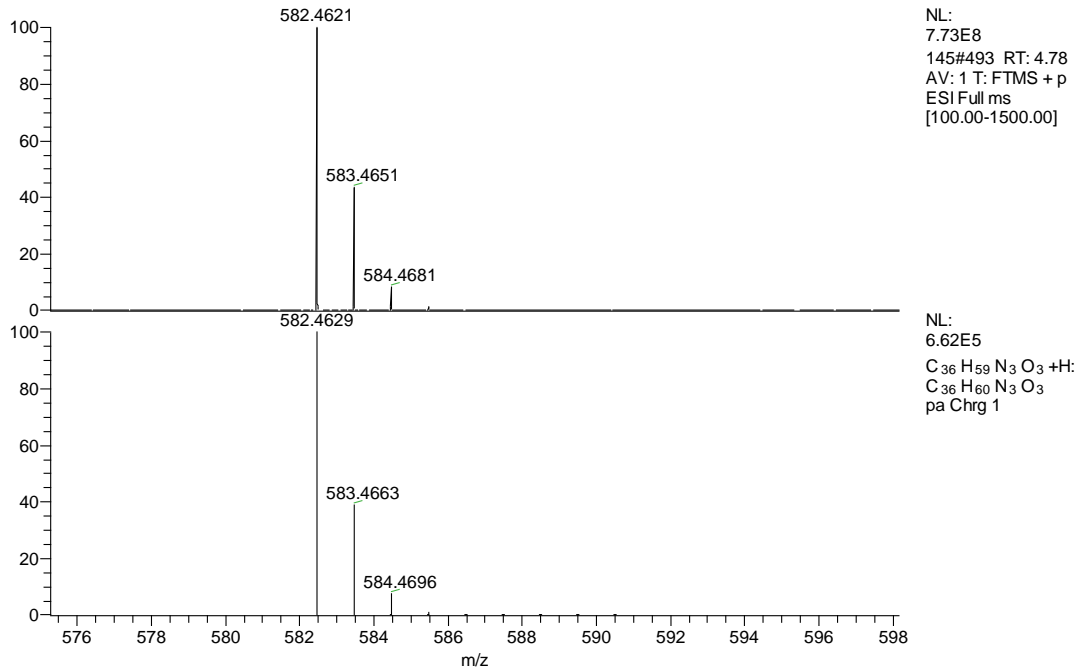

<sup>1</sup>H NMR of compound 29

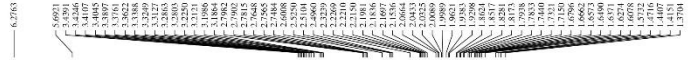

Liang2-33

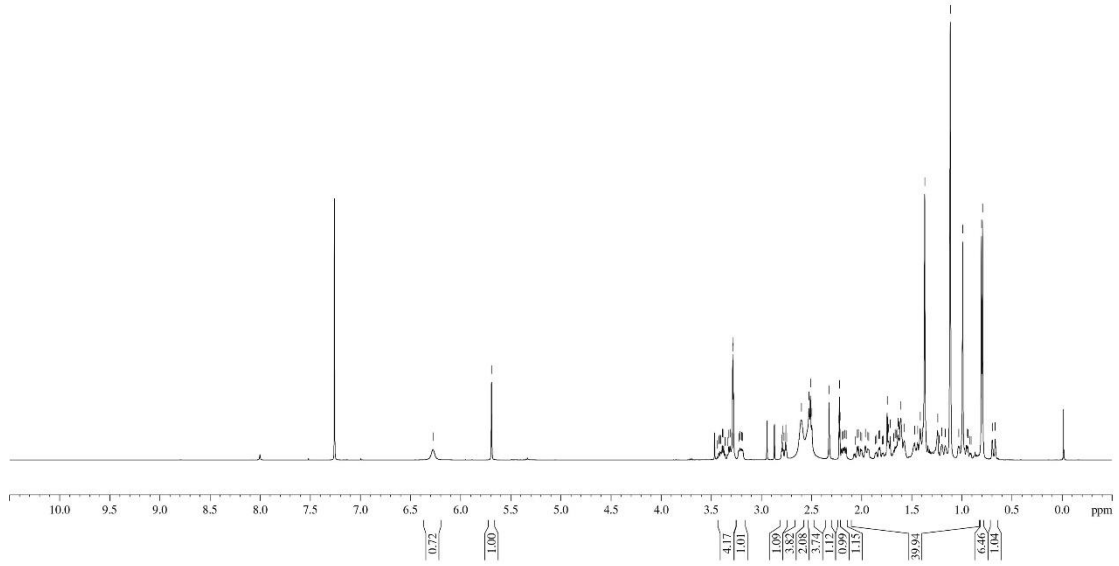

<sup>13</sup>C NMR of compound 29

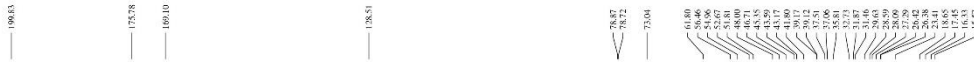

Liang2-33

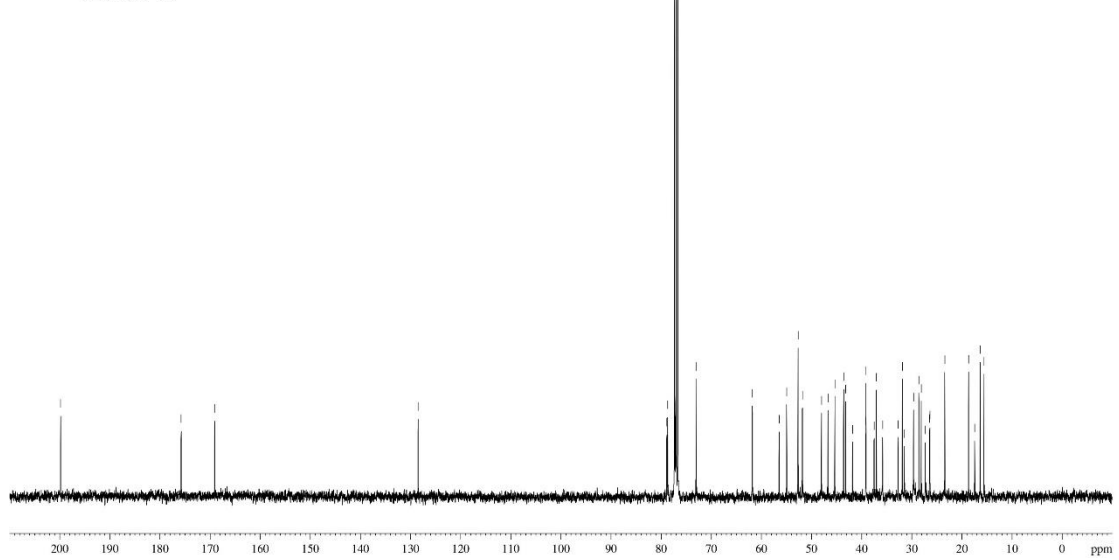

### HRMS of compound 29

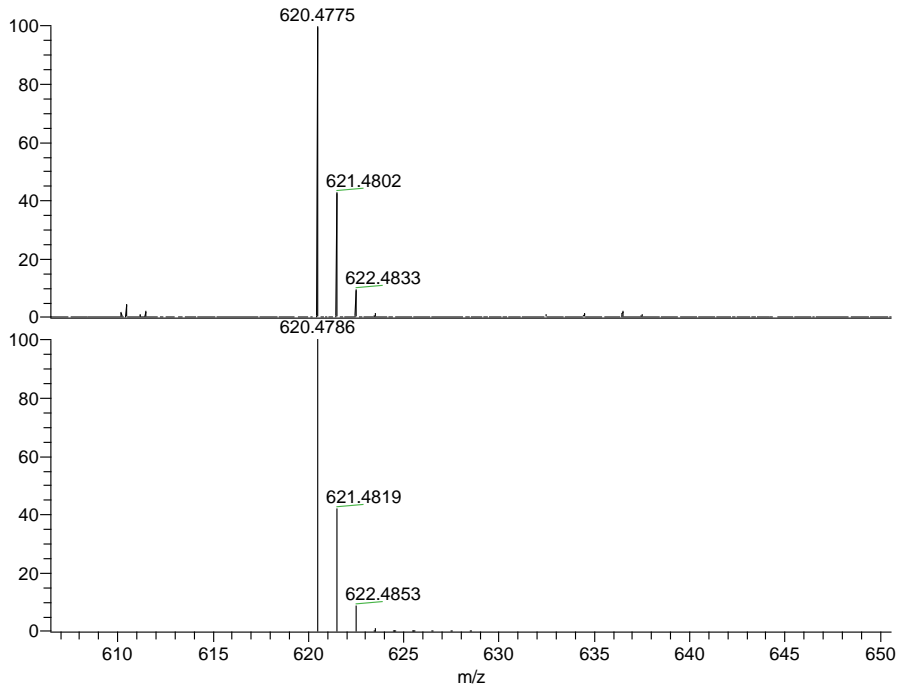

NL:  
4.21E8  
146\_180824210130  
#617 RT: 6.00 AV:  
1 T: FTMS + p ESI  
Full ms  
[100.00-1500.00]

NL:  
6.41E5  
C<sub>39</sub>H<sub>61</sub>N<sub>3</sub>O<sub>3</sub> +H:  
C<sub>39</sub>H<sub>62</sub>N<sub>3</sub>O<sub>3</sub>  
pa Chrg 1

### <sup>1</sup>H NMR of compound 30

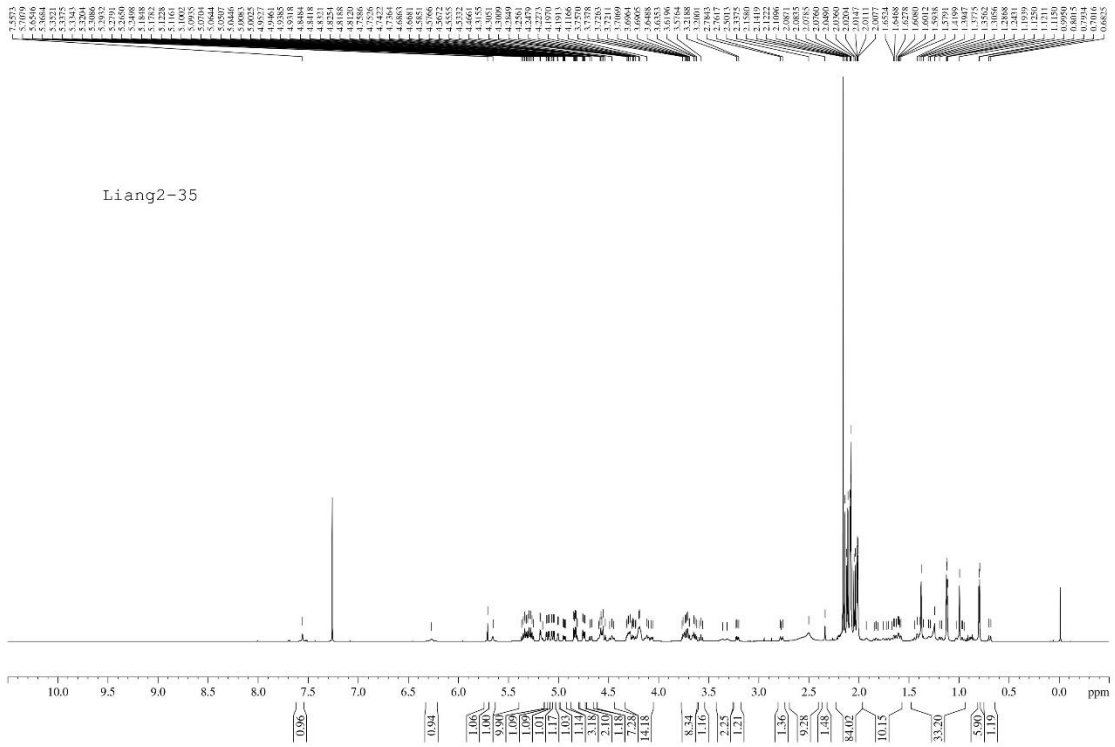

Liang2-35

### <sup>13</sup>C NMR of compound 30

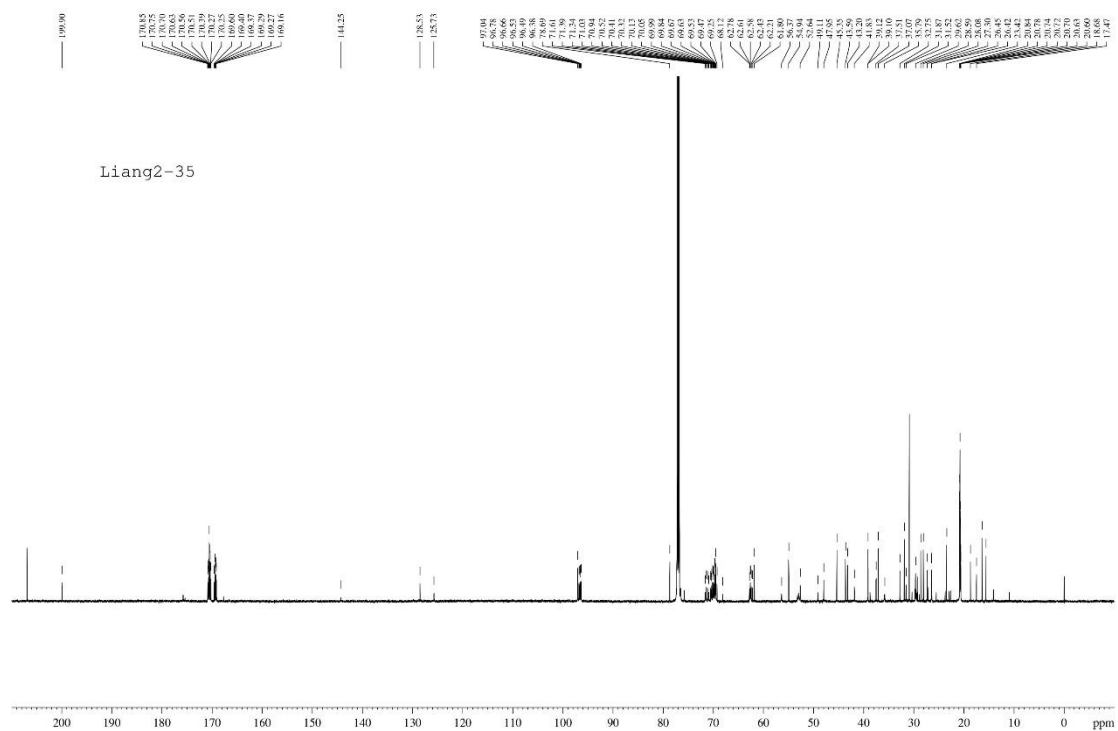

### HSQC of compound 30

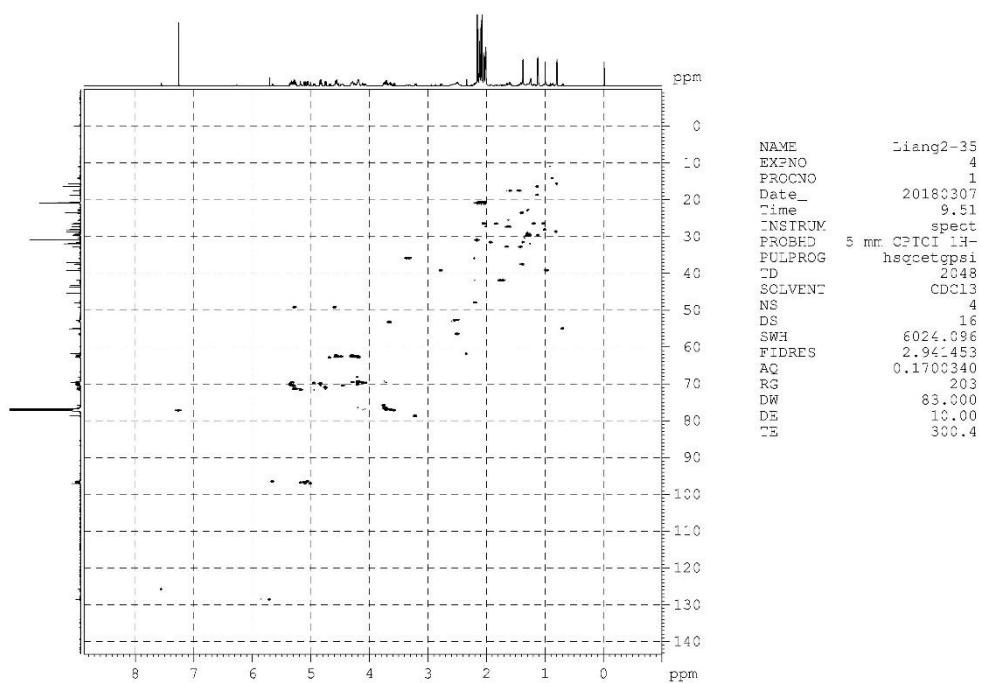

### HRMS of compound 30

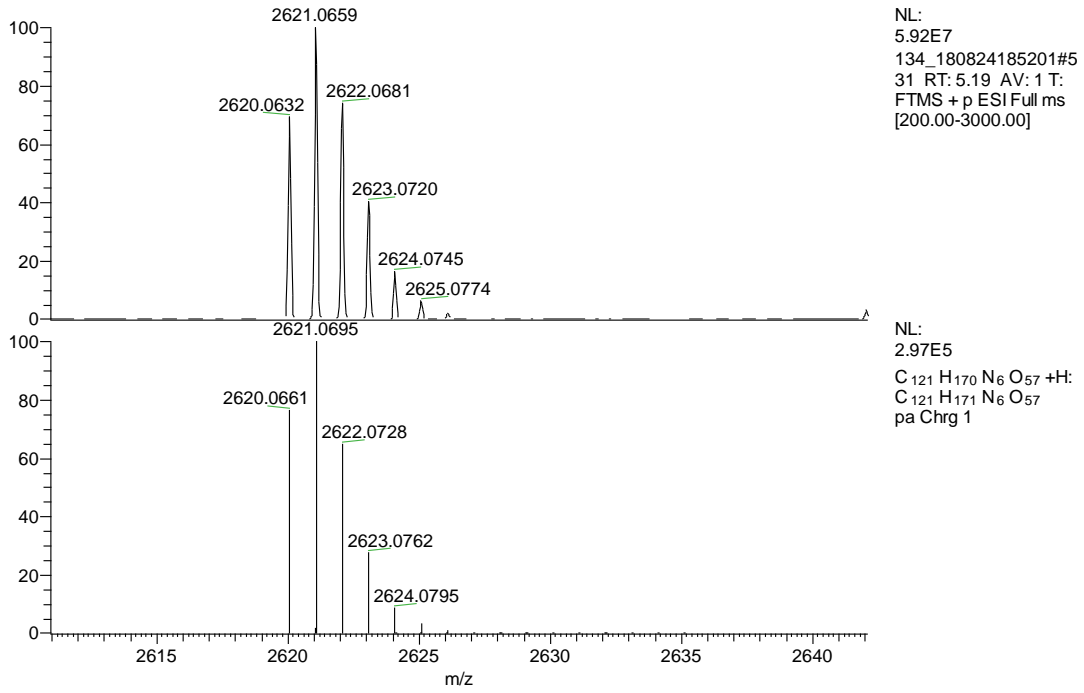

### <sup>1</sup>H NMR of compound 31

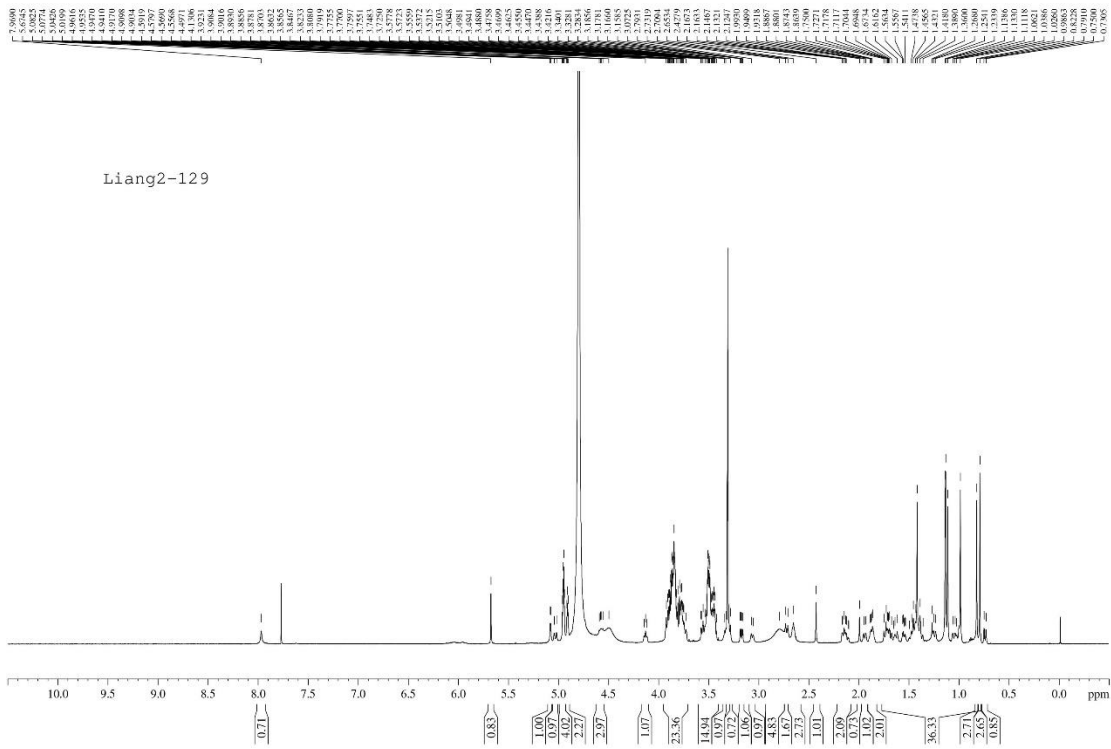



<sup>13</sup>C NMR of compound 31

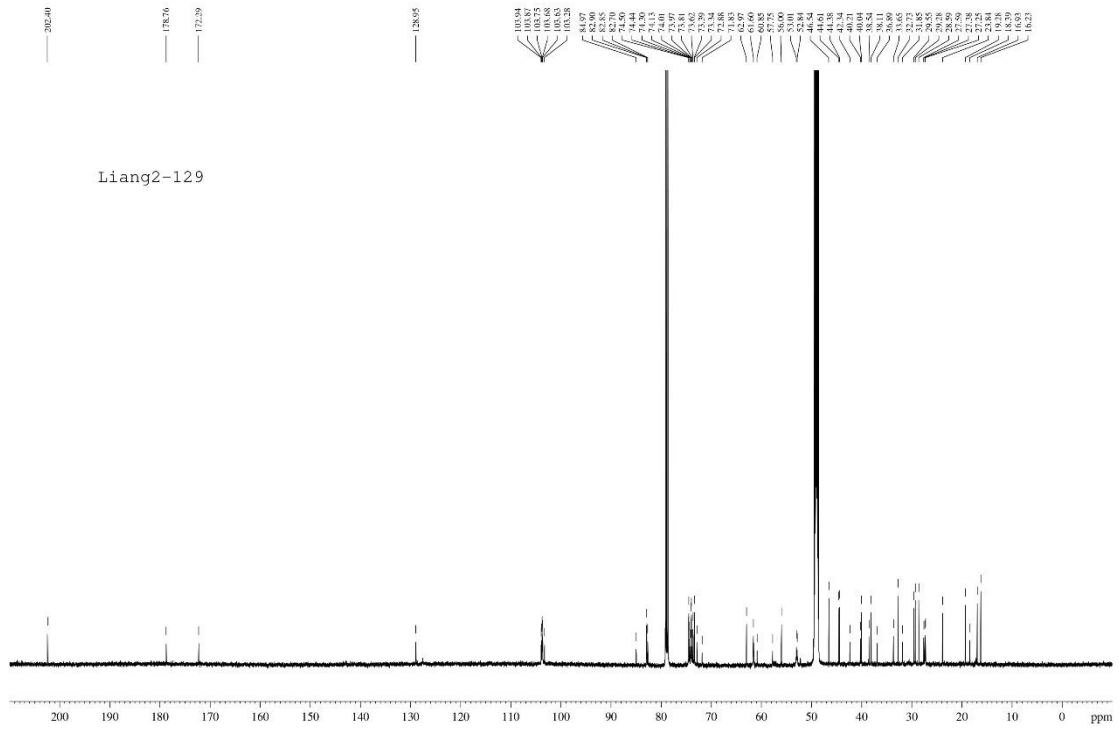

HSQC of compound 31

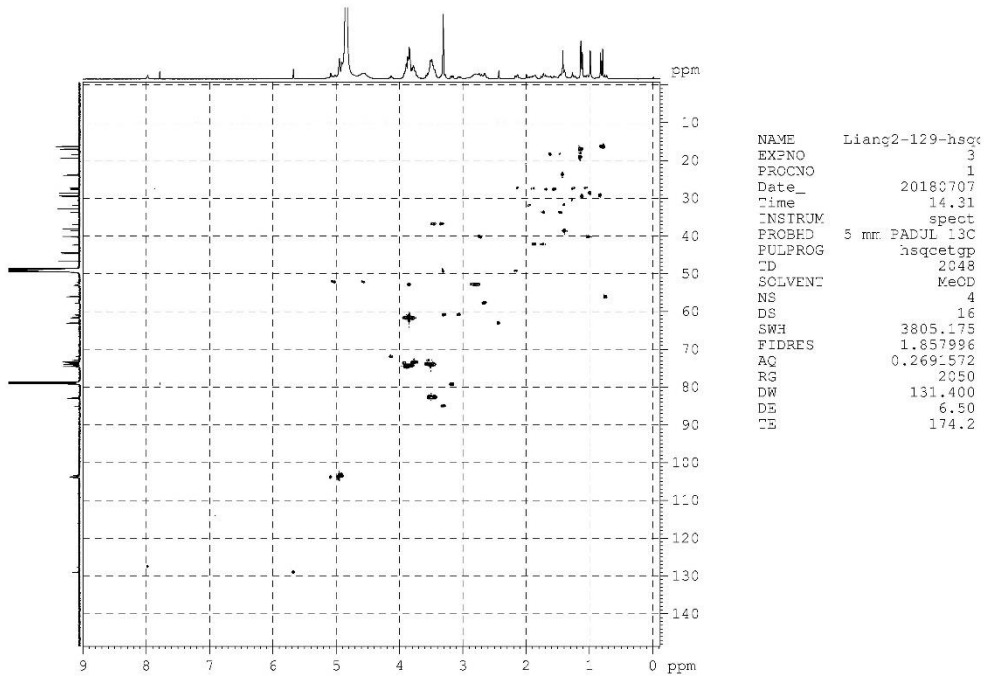

### HRMS of compound 31

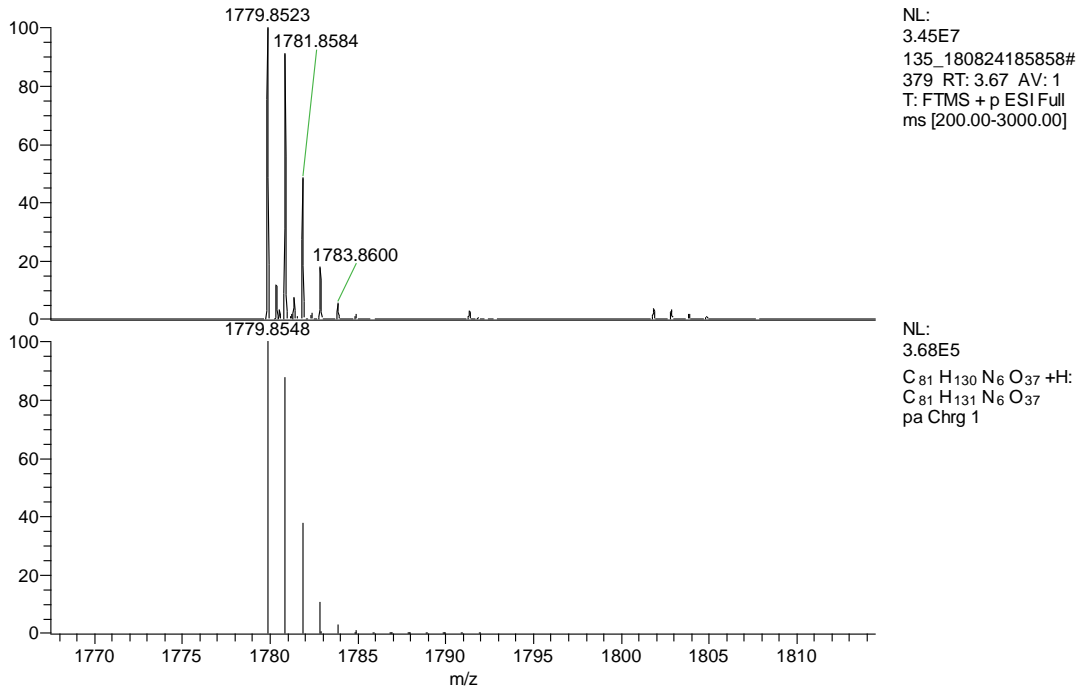

### <sup>1</sup>H NMR of compound 32

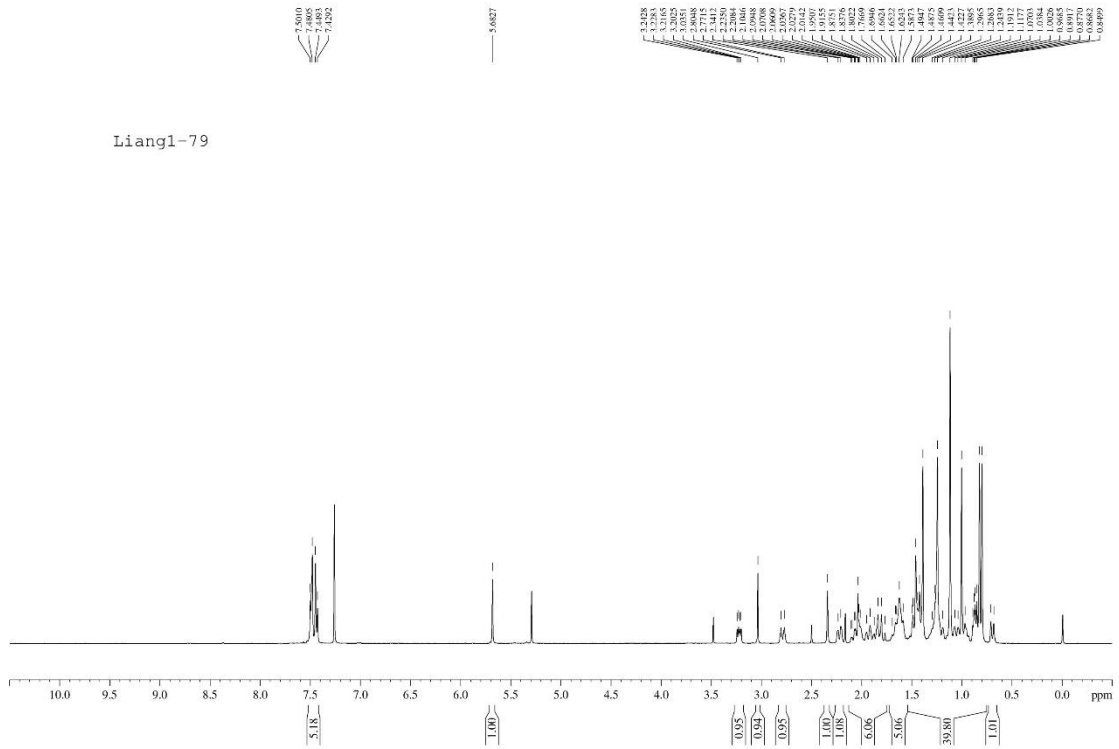

<sup>13</sup>C NMR of compound 32

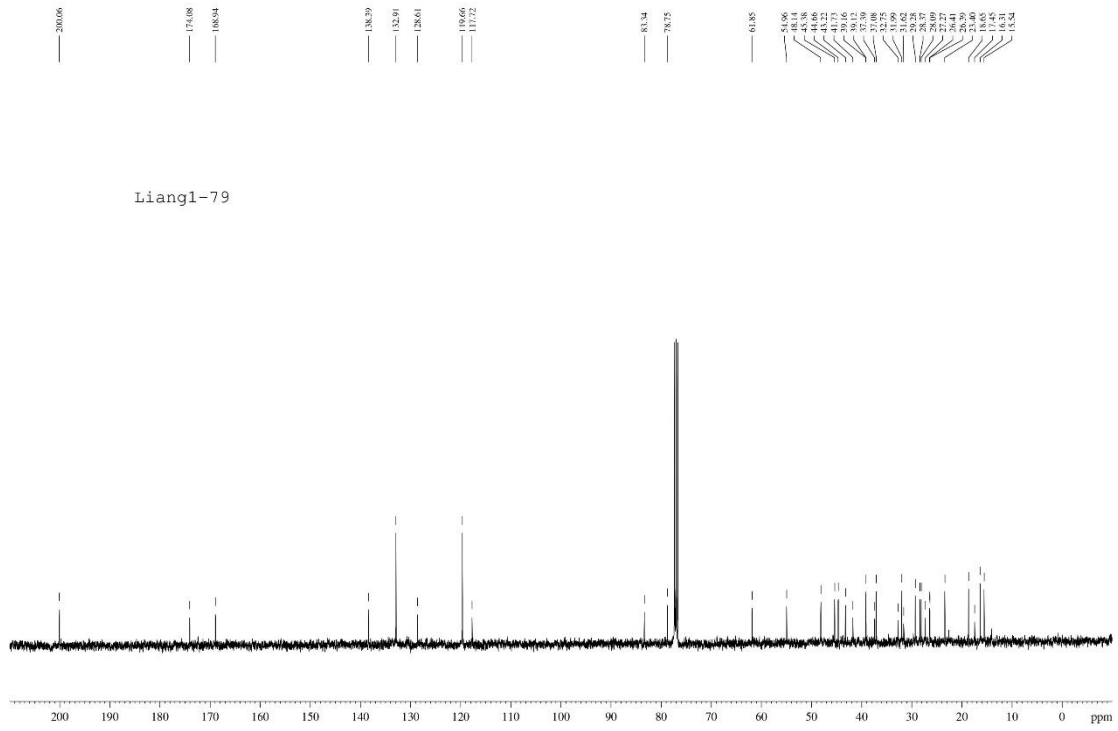

HRMS of compound 32

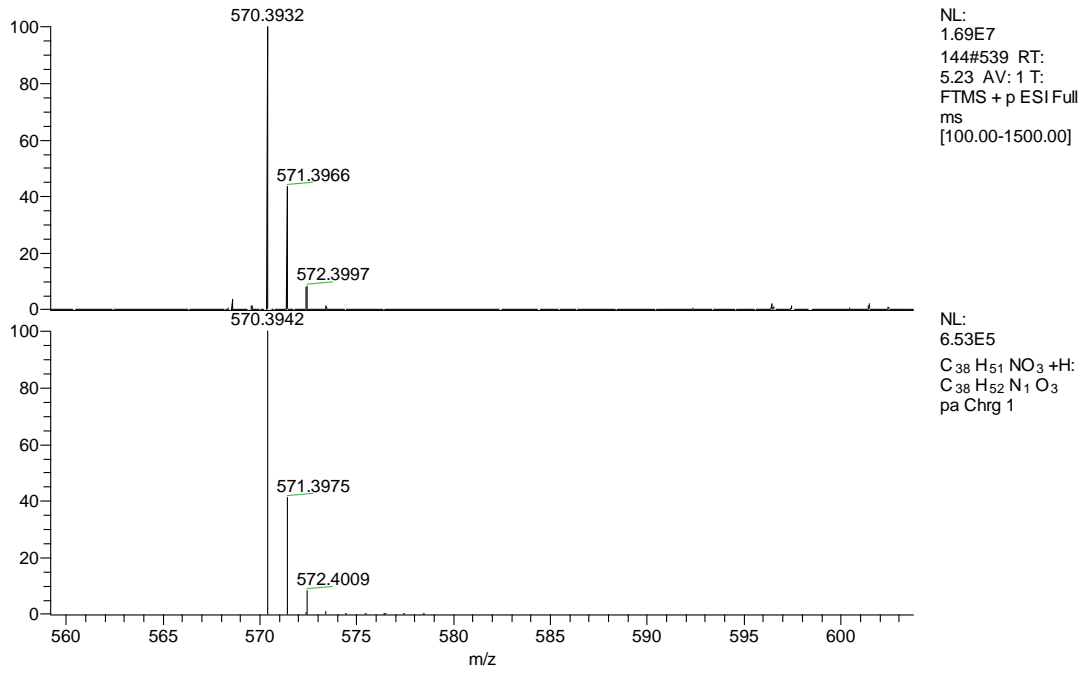



### HSQC of compound 33

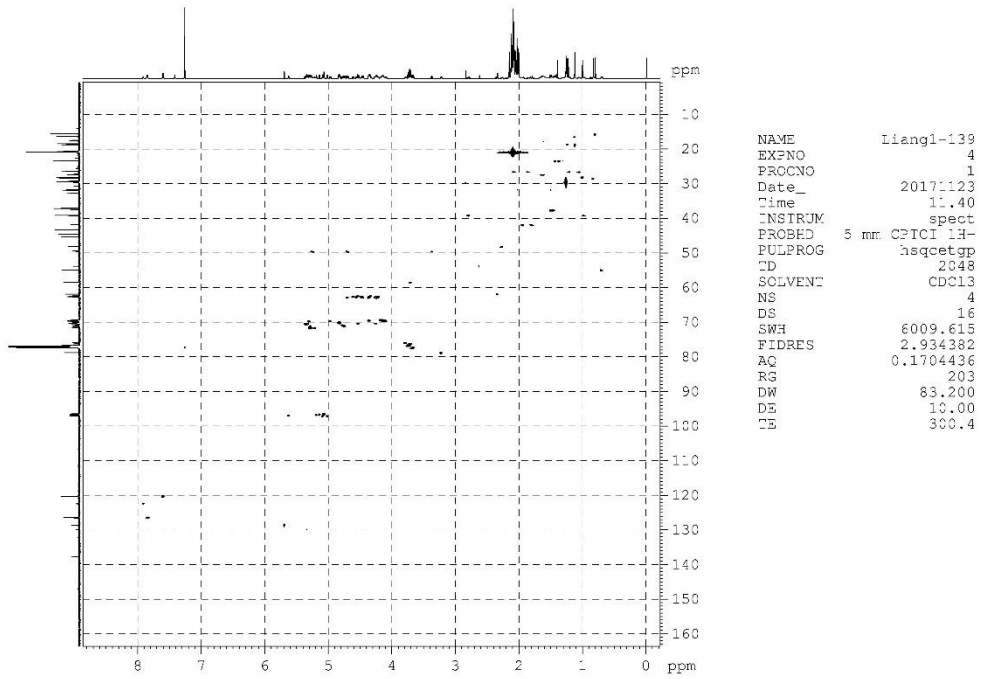

### HRMS of compound 33

132\_180824183815 #513 RT: 5.03 AV: 1 NL: 3.38E6  
T: FTMS + p ESI Full ms [200.00-3000.00]

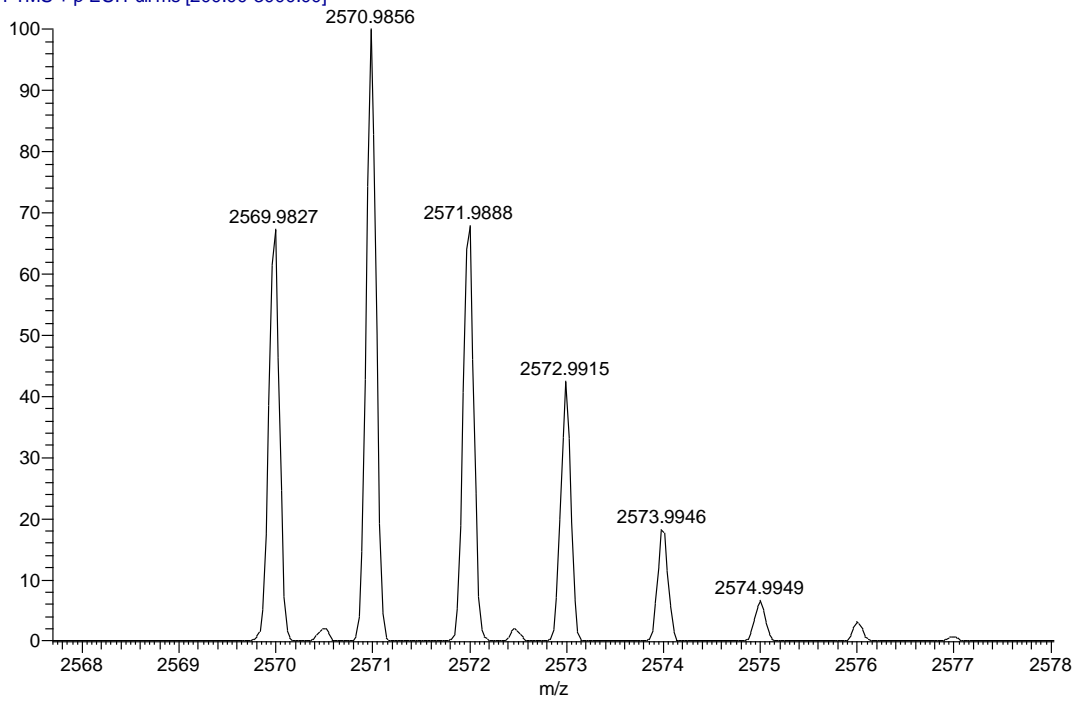

<sup>1</sup>H NMR of compound 34

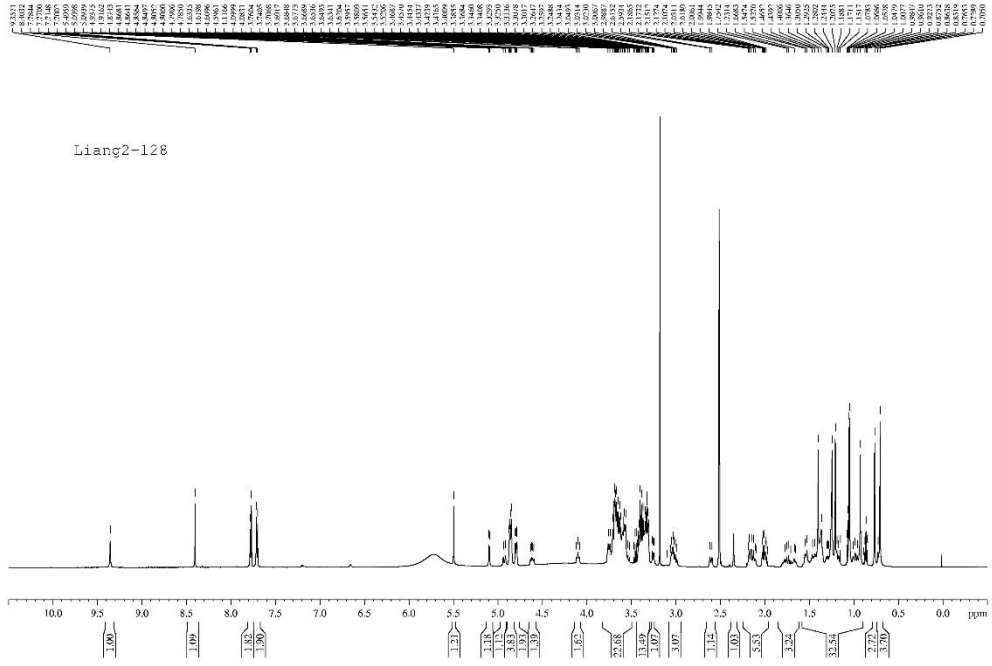

<sup>13</sup>C NMR of compound 34

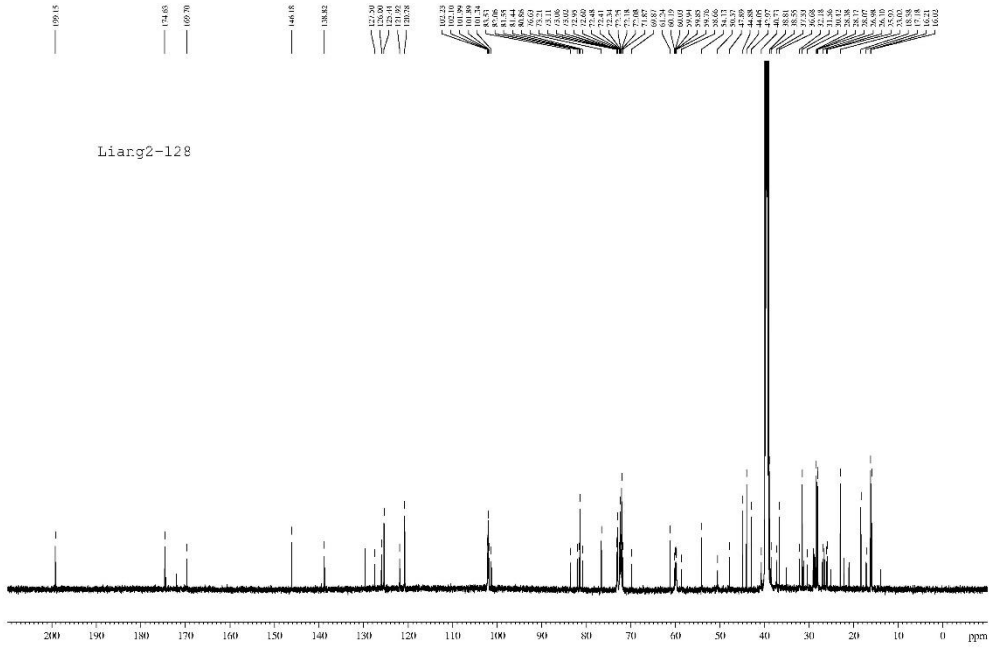

### HSQC of compound 34

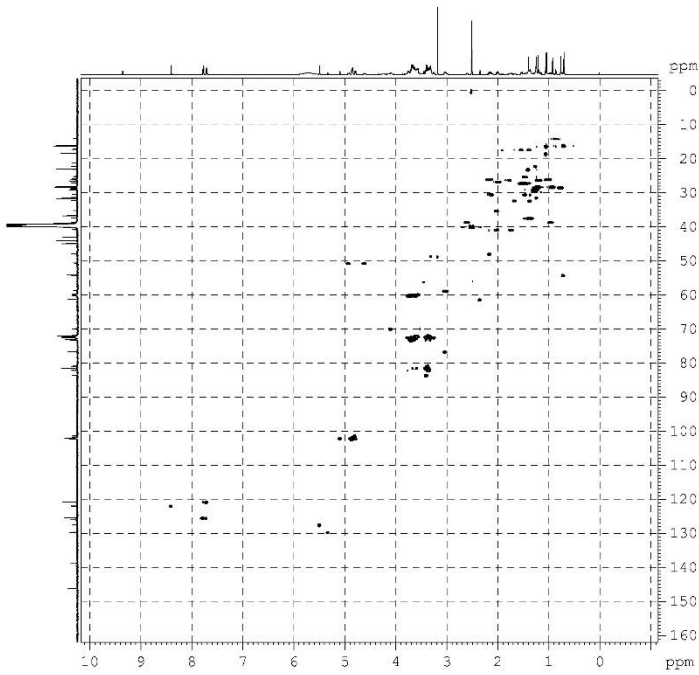

NAME Liang2-128-hsqc  
EXPNO 4  
PROCNO 1  
Date\_ 20180122  
Time 9.48  
INSTRUM spect  
PROBHD 5 mm CPIC1 1H-  
PULPROG hsqcetgpsisp2.2  
TD 2048  
SOLVENT DMSO  
NS 8  
DS 32  
SWH 6793.478  
FIDRES 3.317128  
AQ 0.1507828  
RG 203  
DW 73.600  
DE 10.00  
TE 300.4

### HRMS of compound 34

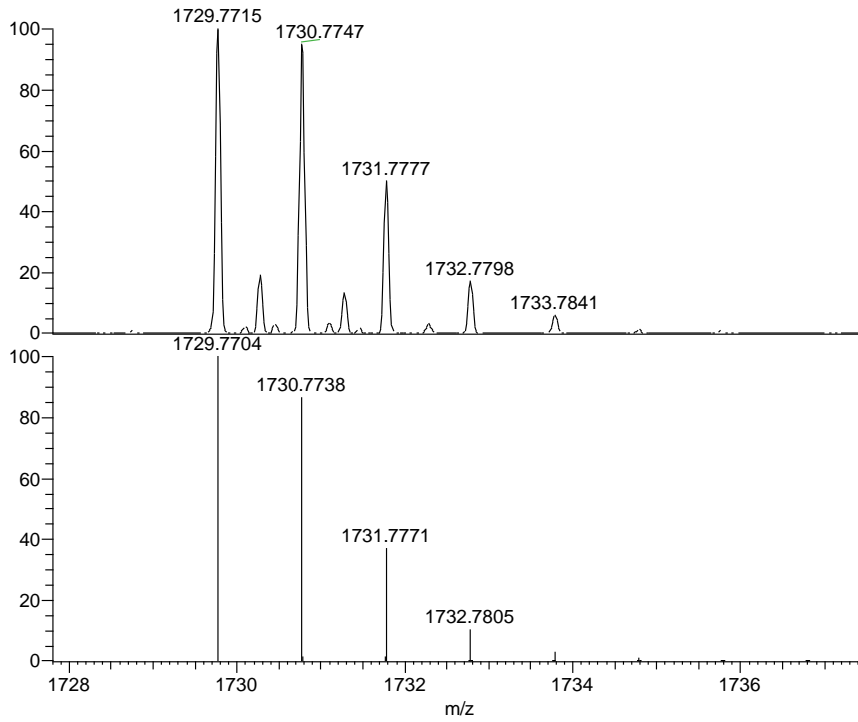

NL:  
2.17E7  
133\_180824184508#  
337 RT: 3.27 AV: 1  
T: FTMS + p ESI Full  
ms [200.00-3000.00]

NL:  
3.76E5  
C<sub>80</sub>H<sub>120</sub>N<sub>4</sub>O<sub>37</sub>+H:  
C<sub>80</sub>H<sub>121</sub>N<sub>4</sub>O<sub>37</sub>  
pa Chrg 1

# <sup>1</sup>H NMR of compound 35

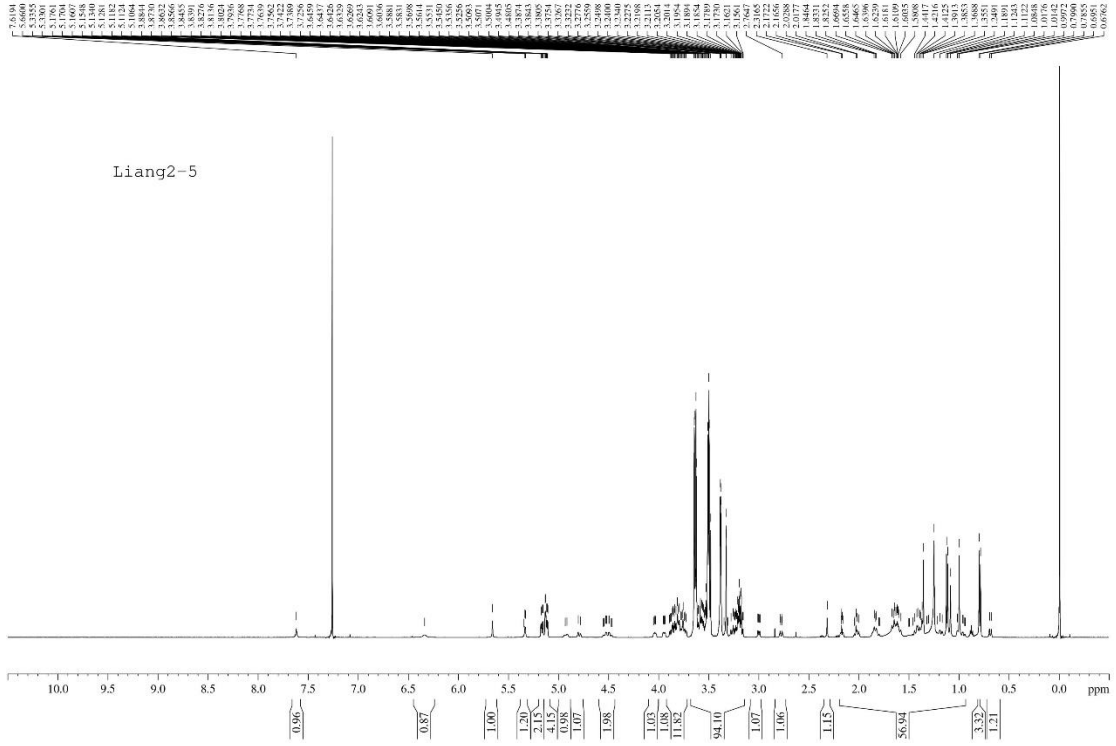



### HSQC of compound 35

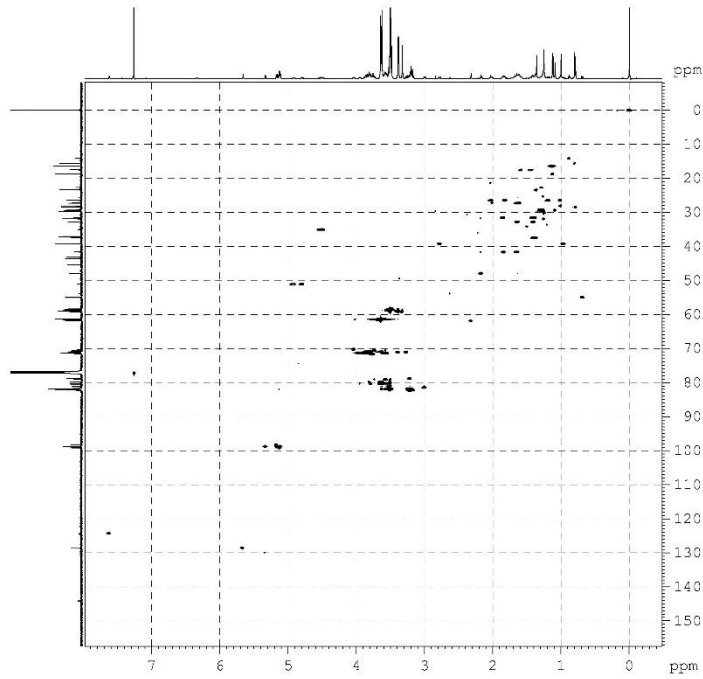

```

NAME          Liang2-5
EXPNO         4
PROCNO        1
Date_         2017-212
Time          23.57
INSTRUM       spect
PROBHD        5 mm CPIC1 1H-
PULPROG       hsqcetpsi
TD            2048
SOLVENT       CDCl3
NS            16
DS            16
SWH           5081.301
FIDRES        2.481104
AQ            0.2015732
RG            203
DW            98.400
DE            10.00
TE            300.4
    
```

### HRMS of compound 35

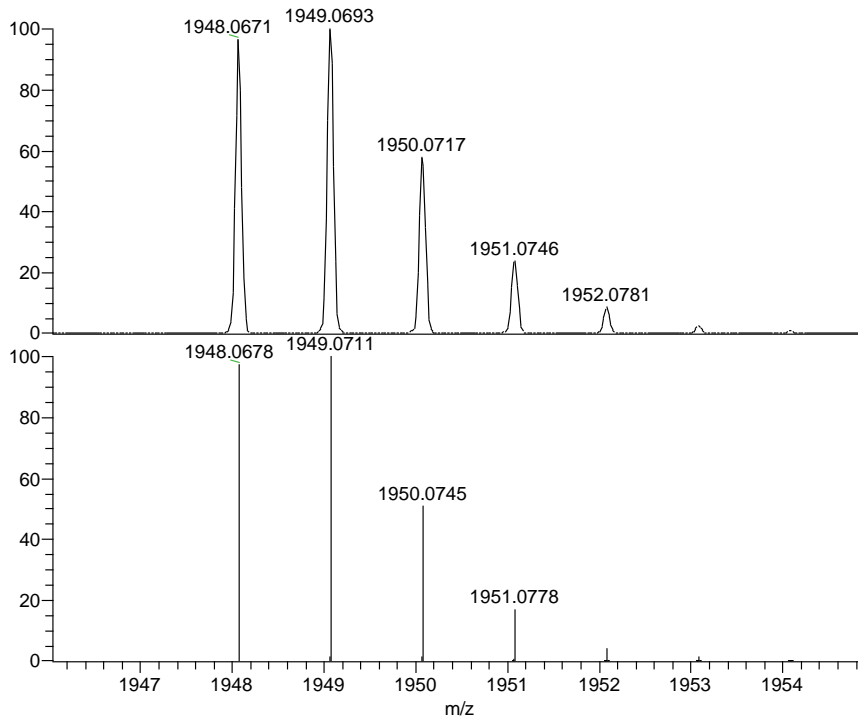

```

NL:
6.75E7
139_180824192638#
505 RT: 4.92 AV: 1
T: FTMS + p ESI Full
ms [200.00-3000.00]
    
```

```

NL:
3.27E5
C95H158N4O37 +H:
C95H159N4O37
pa Chrg 1
    
```



HRMS of compound 37

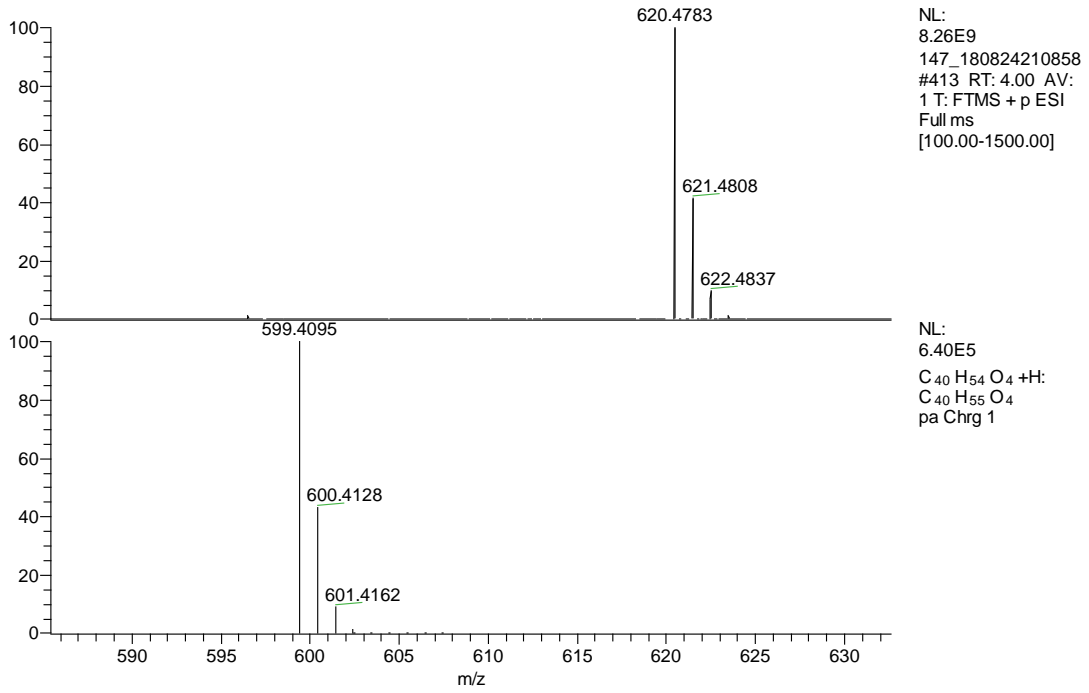

<sup>1</sup>H NMR of compound 38

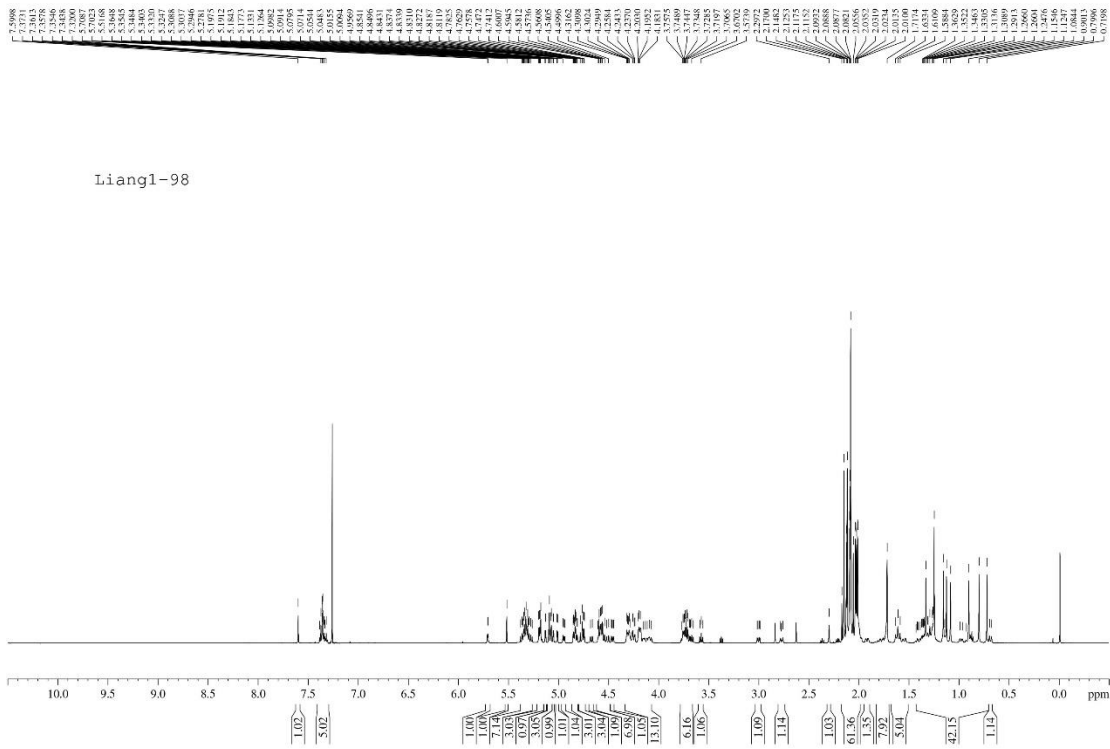

<sup>13</sup>C NMR of compound 38

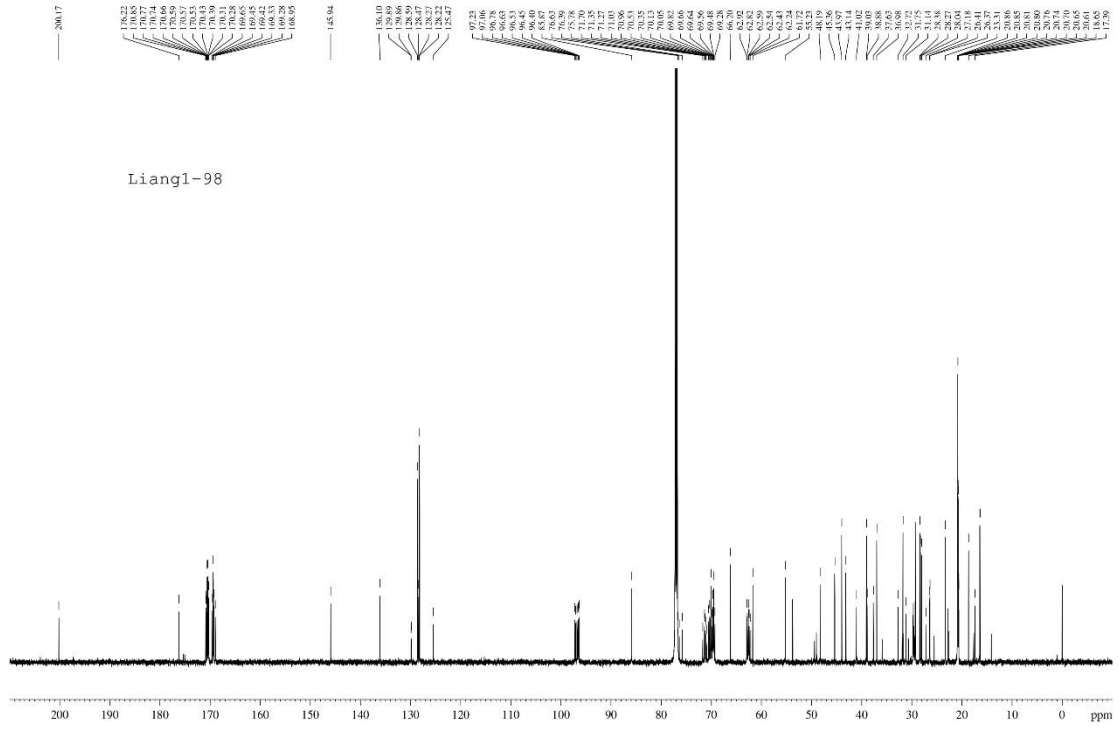

HSQC of compound 38

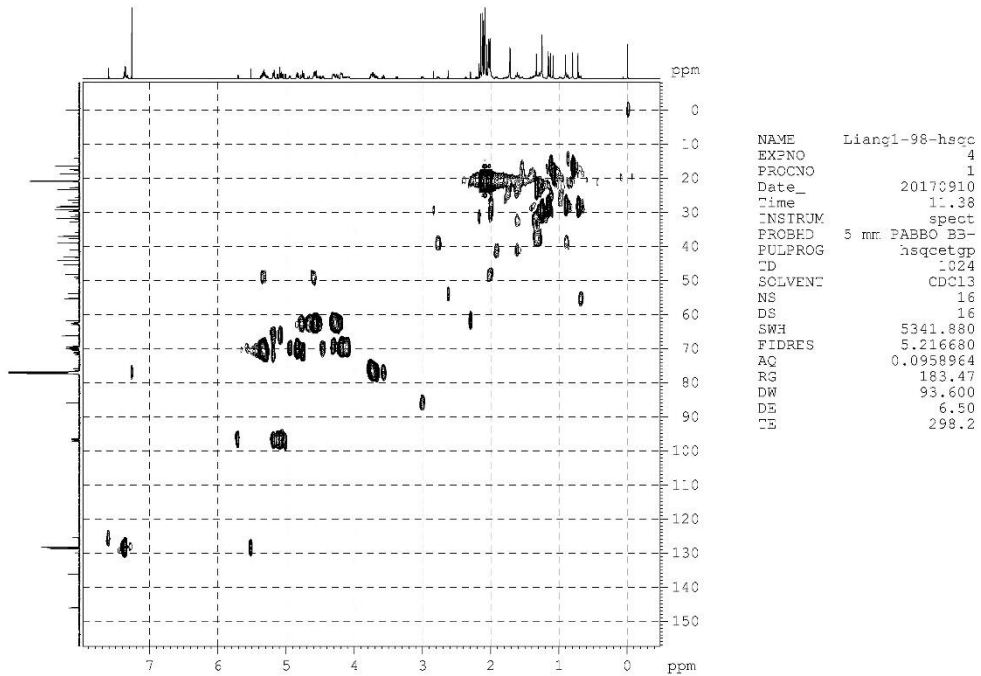

### HRMS of compound 38

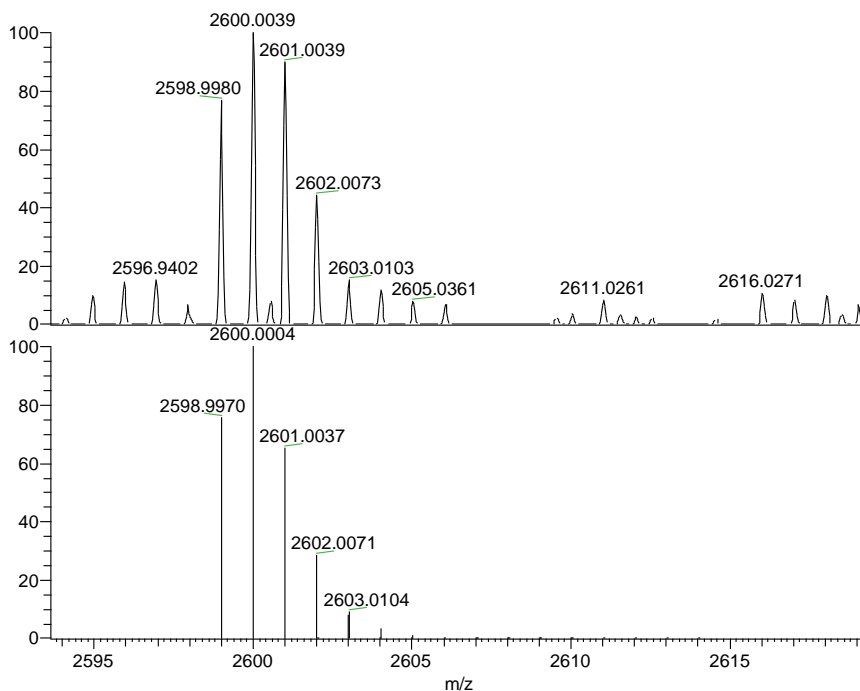

NL:  
1.43E6  
136\_180824190552#6  
11 RT: 5.95 AV: 1 T:  
FTMS + p ESI Full ms  
[200.00-3000.00]

NL:  
2.99E5  
C<sub>122</sub>H<sub>163</sub>N<sub>3</sub>O<sub>58</sub> +H:  
C<sub>122</sub>H<sub>164</sub>N<sub>3</sub>O<sub>58</sub>  
pa Chrg 1

### <sup>1</sup>H NMR of compound 39

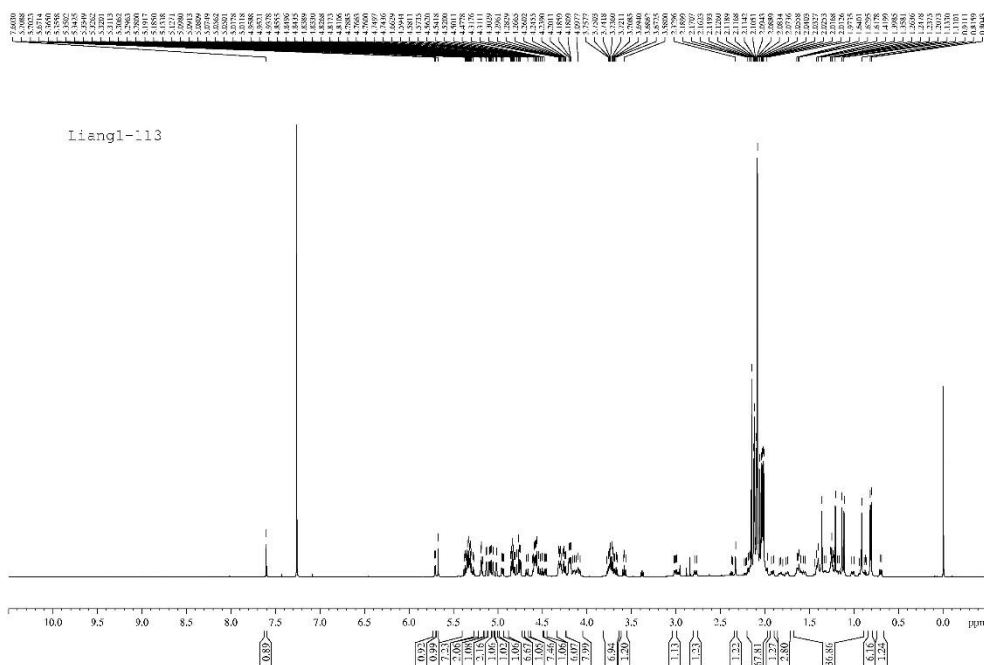

### <sup>13</sup>C NMR of compound 39

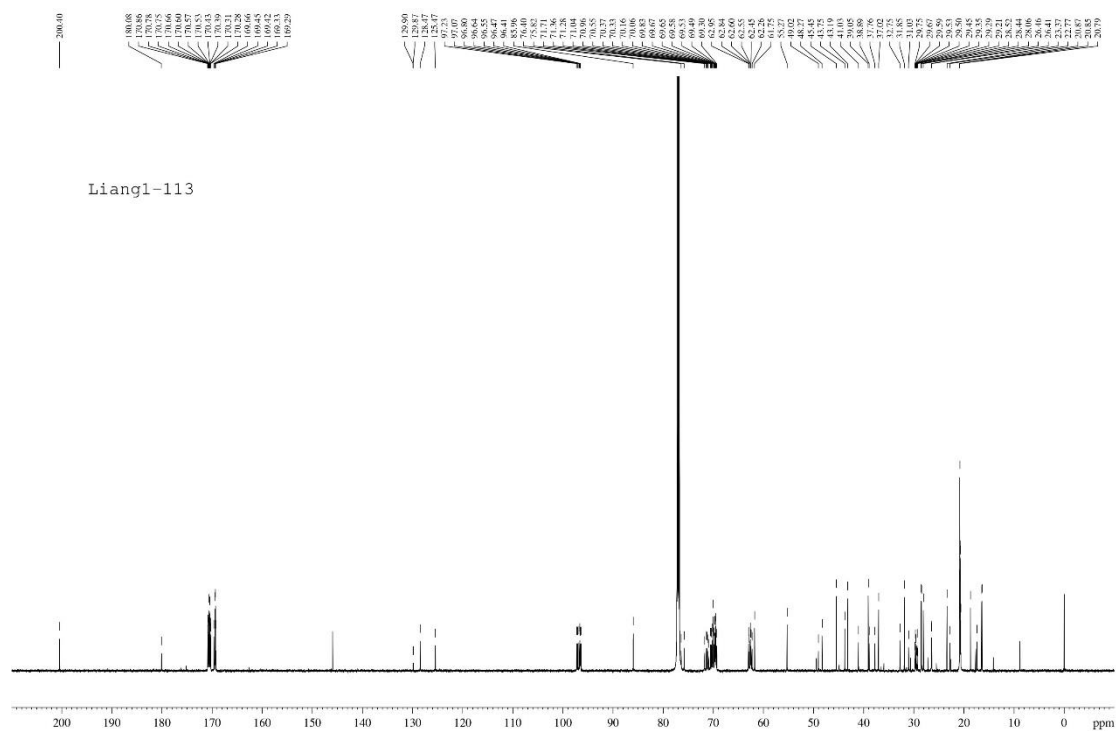

### HSQC of compound 39

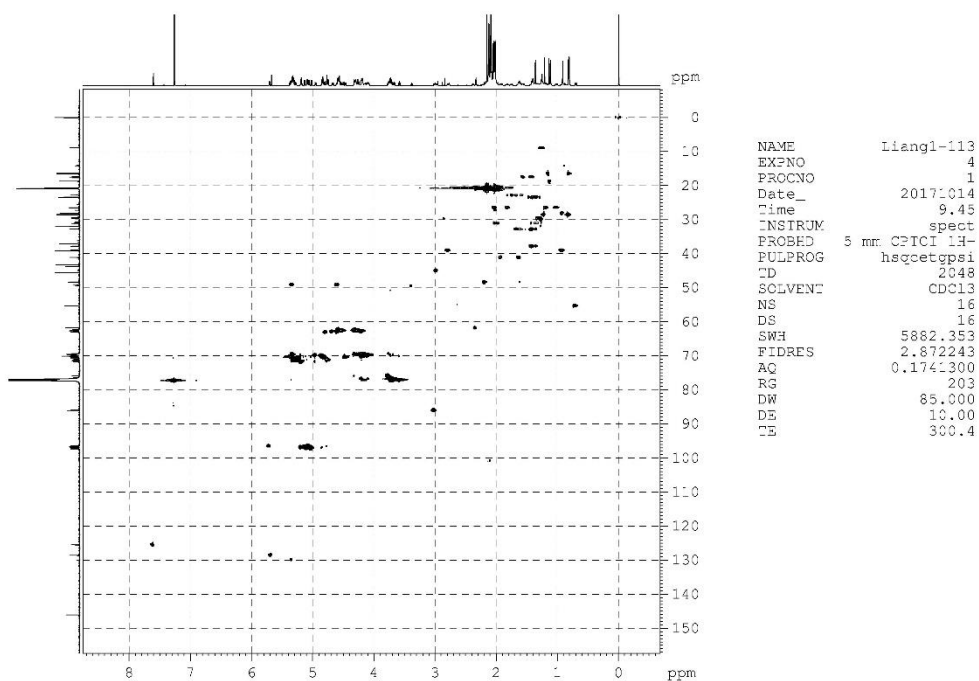

### HRMS of compound 39

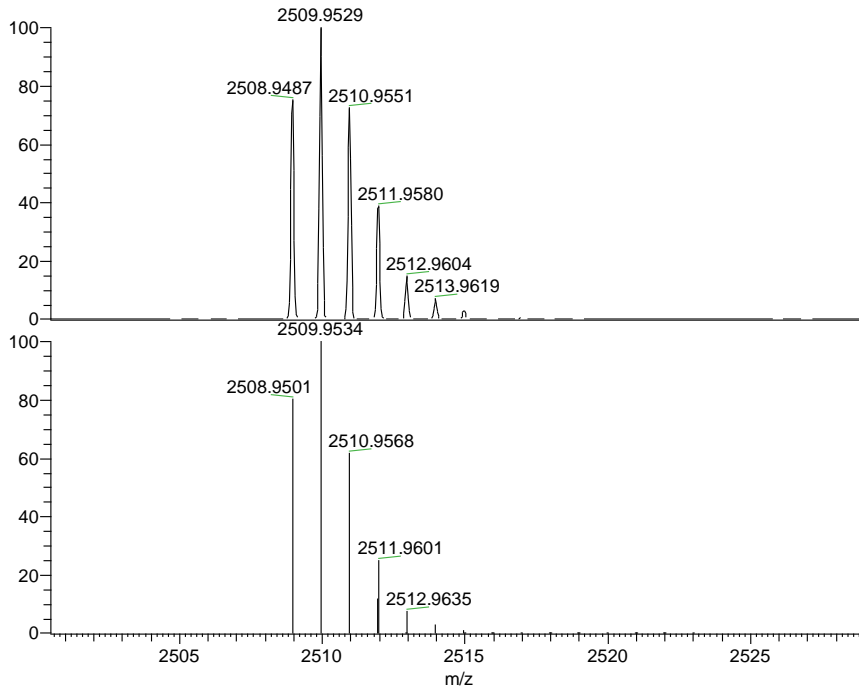

NL:  
1.08E7  
137\_180824191247#4  
95 RT: 4.79 AV: 1 T:  
FTMS + p ESI Full ms  
[200.00-3000.00]

NL:  
3.04E5  
C<sub>115</sub>H<sub>157</sub>N<sub>3</sub>O<sub>58</sub> +H:  
C<sub>115</sub>H<sub>158</sub>N<sub>3</sub>O<sub>58</sub>  
pa Chrg 1

### <sup>1</sup>H NMR of compound 40

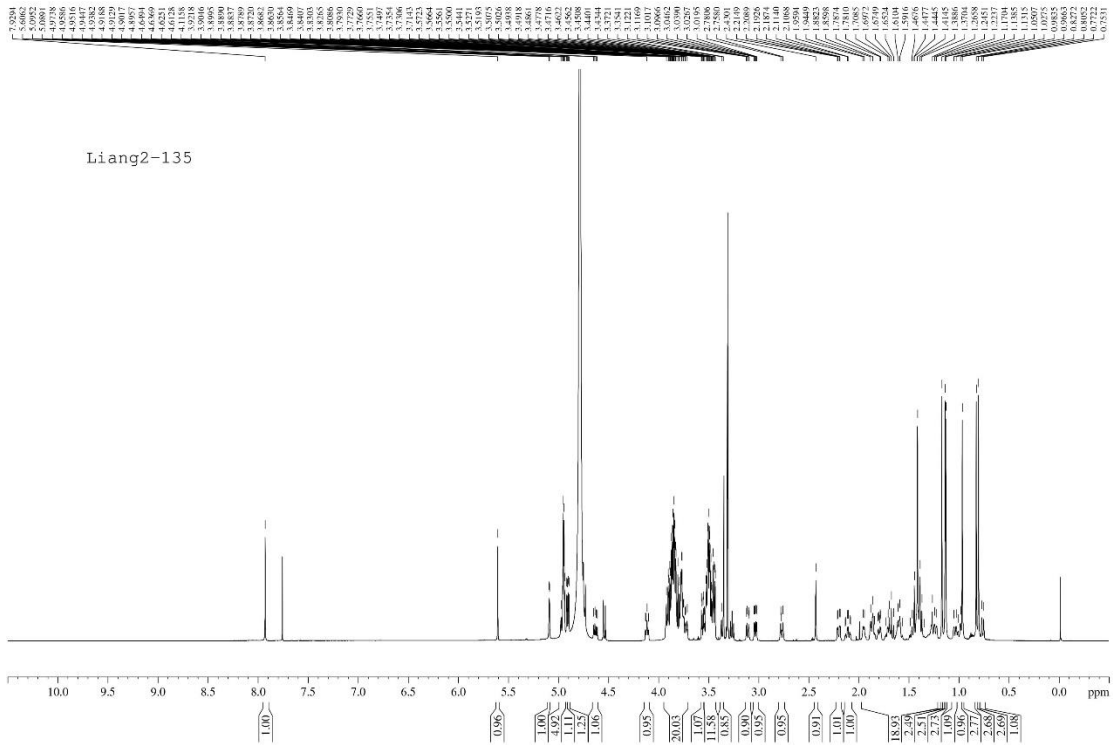

### <sup>13</sup>C NMR of compound 40

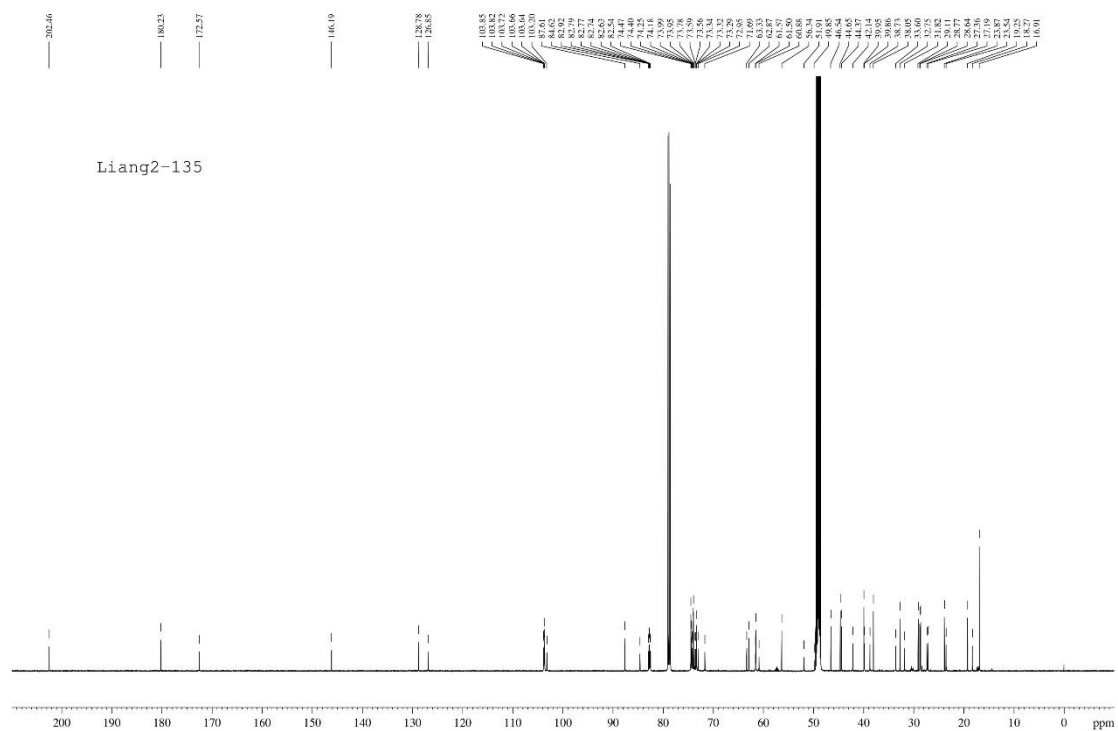

### HSQC of compound 40

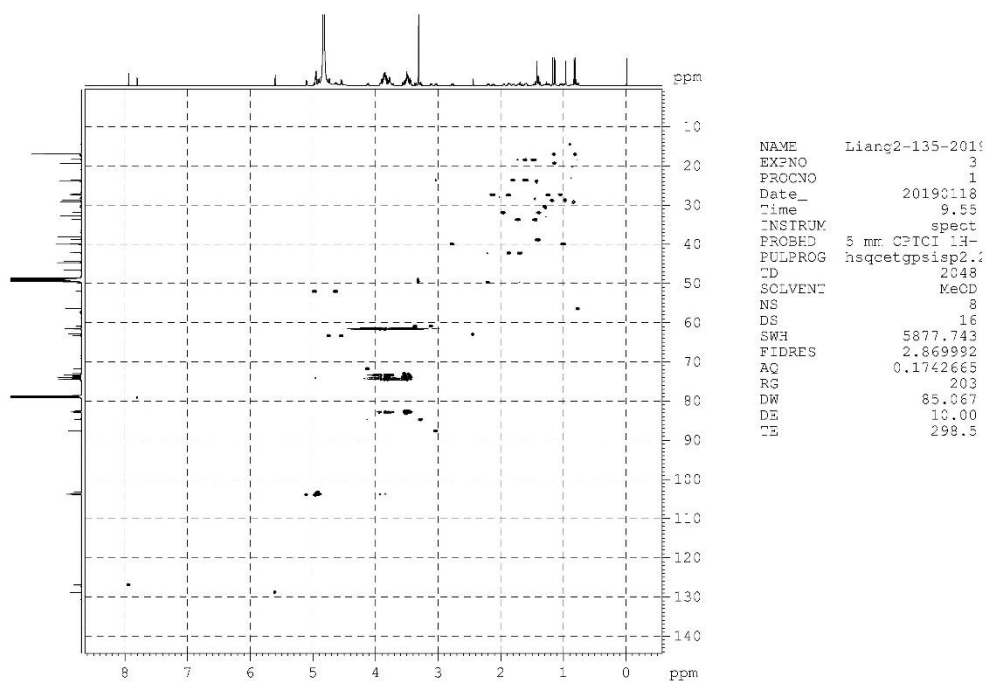



HRMS of compound **40**

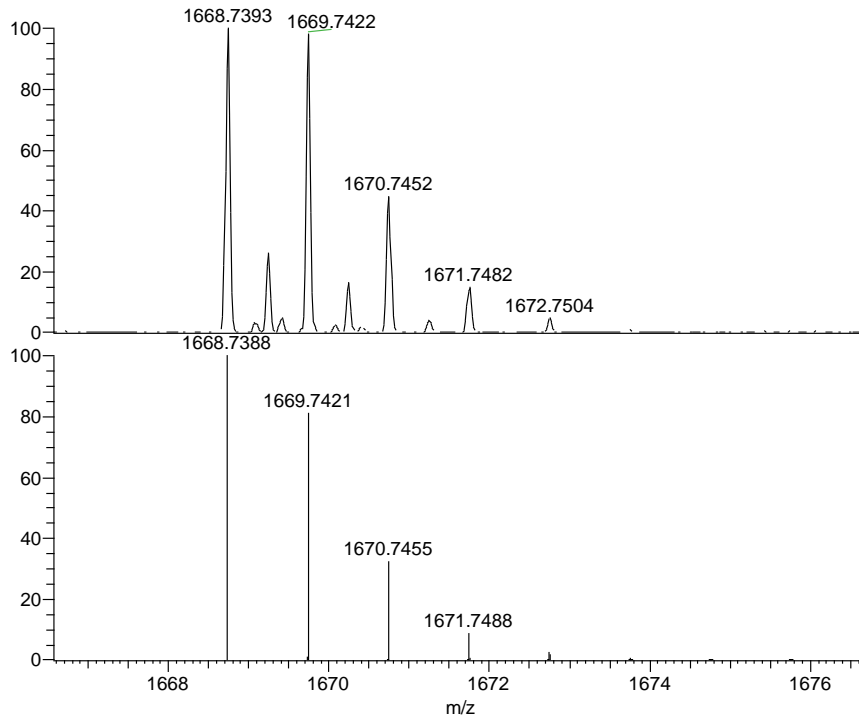

NL:  
5.69E7  
138\_180824191943#  
331 RT: 3.22 AV: 1  
T: FTMS + p ESI Full  
ms [200.00-3000.00]

NL:  
3.97E5  
C<sub>75</sub> H<sub>117</sub> N<sub>3</sub> O<sub>38</sub> +H:  
C<sub>75</sub> H<sub>118</sub> N<sub>3</sub> O<sub>38</sub>  
pa Chrg 1
